# Supplementary material for: Plant defense synergies and antagonisms affect performance of specialist herbivores of common milkweed
Source: bioRxiv or medRxiv preprint supplement (doi:10.1101/2021.09.13.460116), 2022-08-03

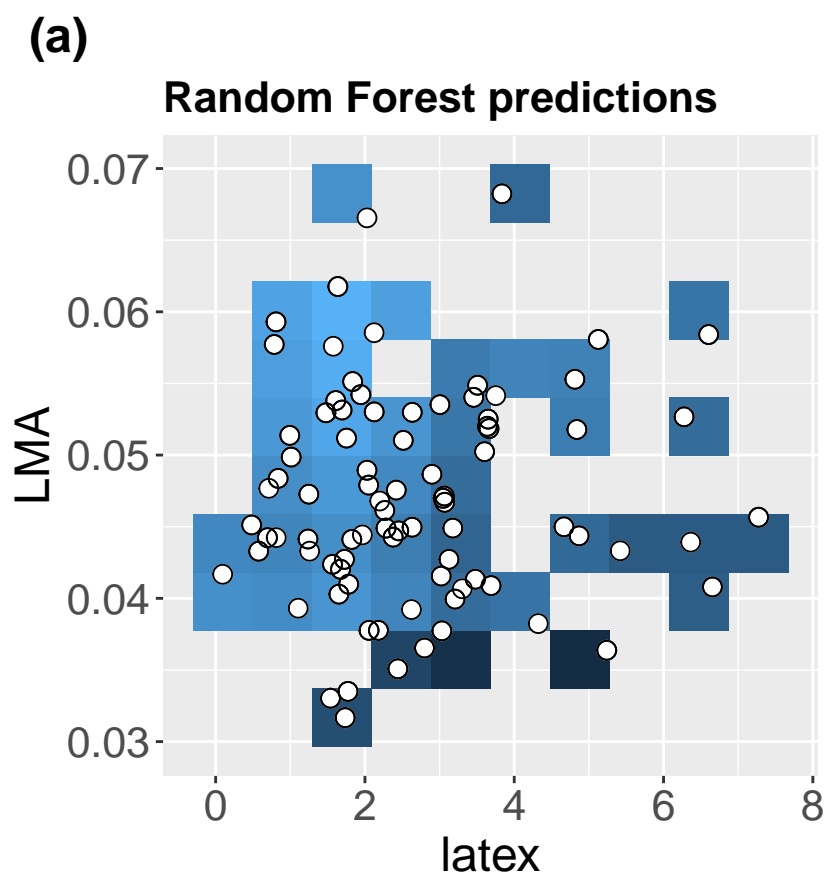

Monarch Growth

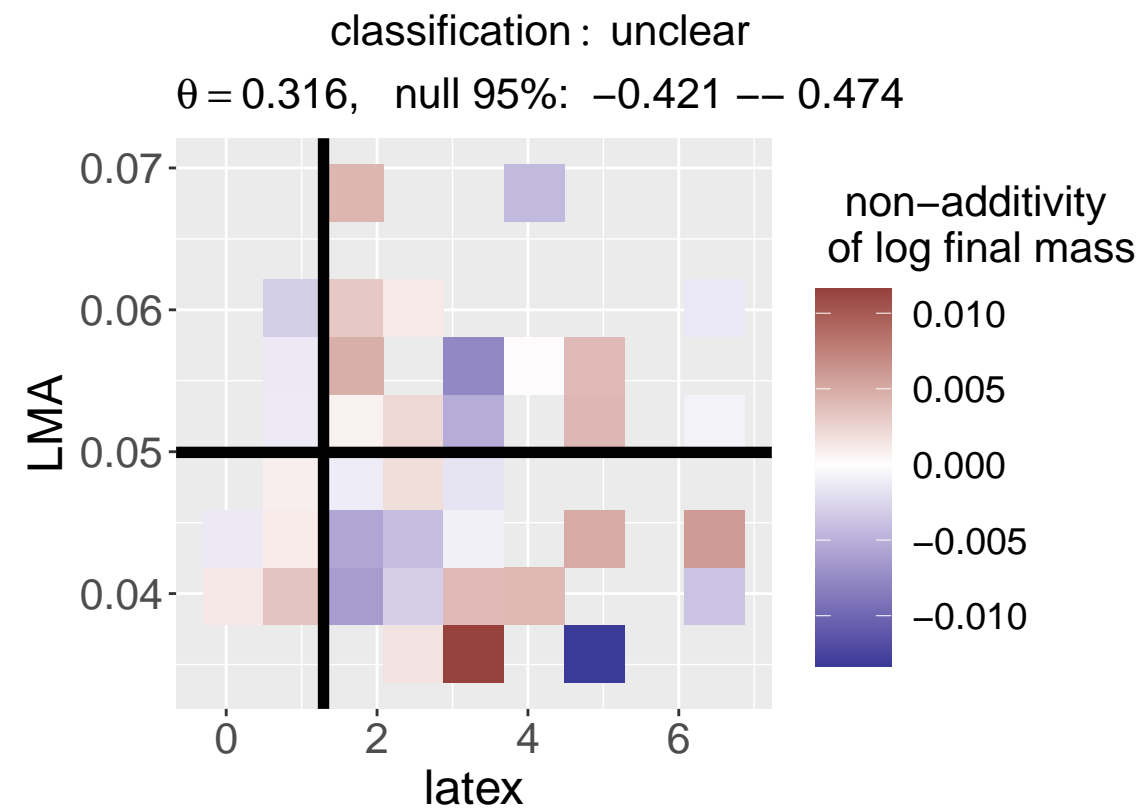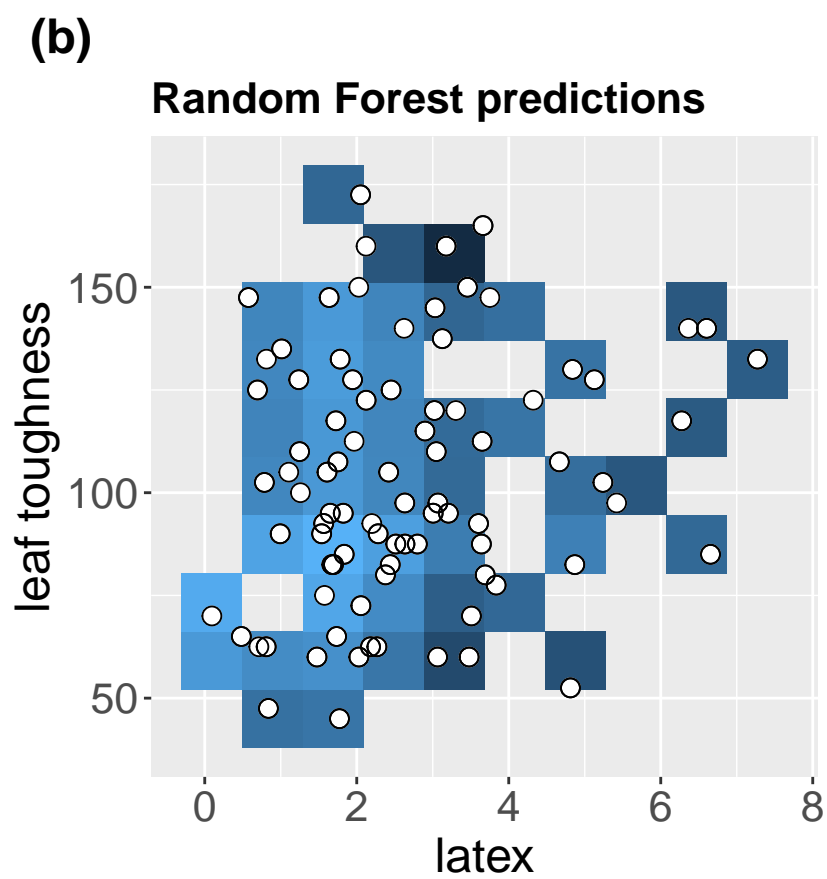

Monarch Growth

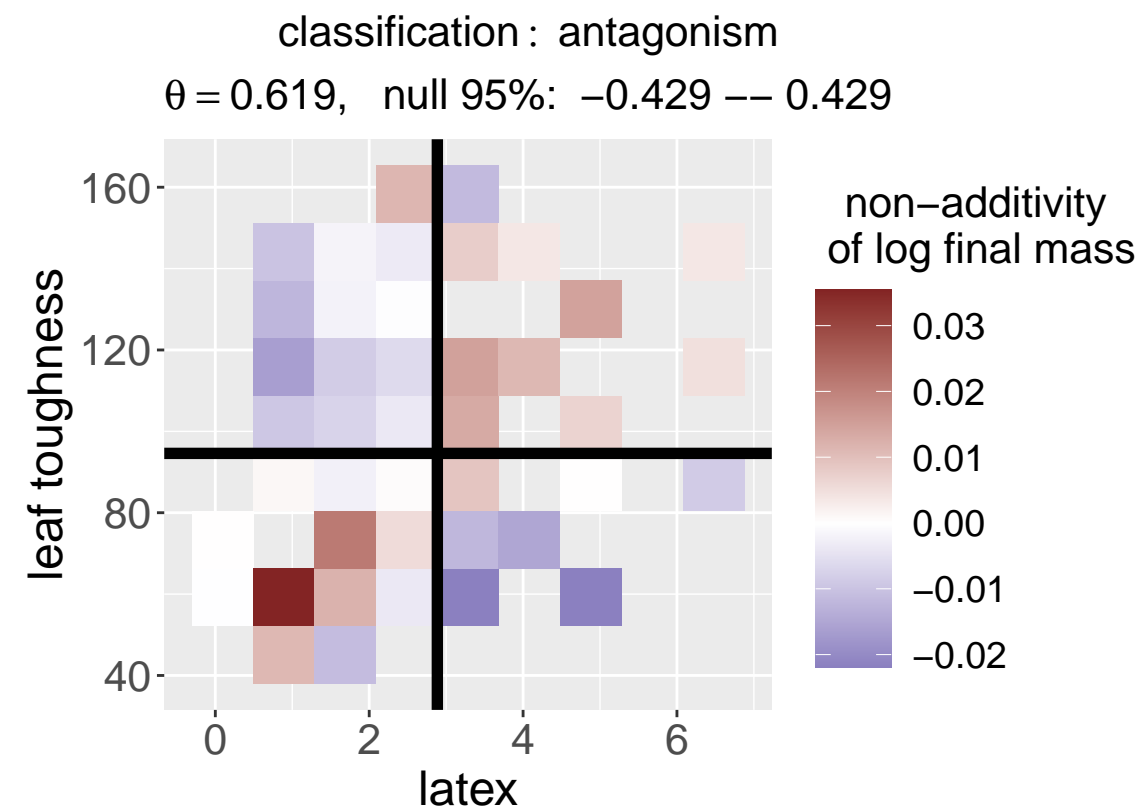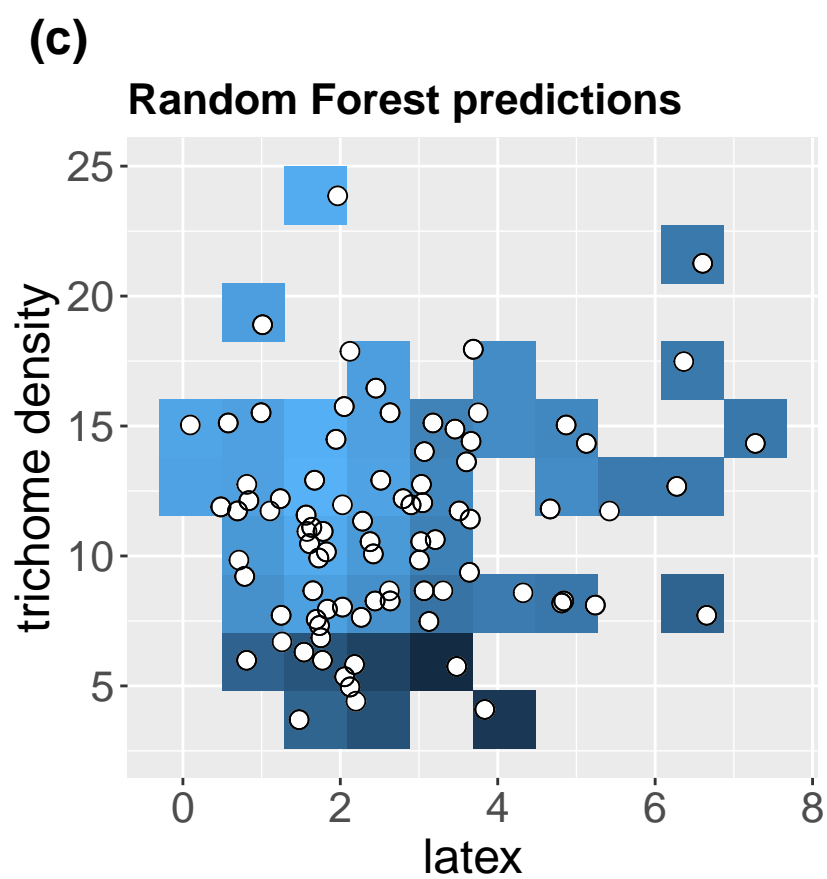

Monarch Growth

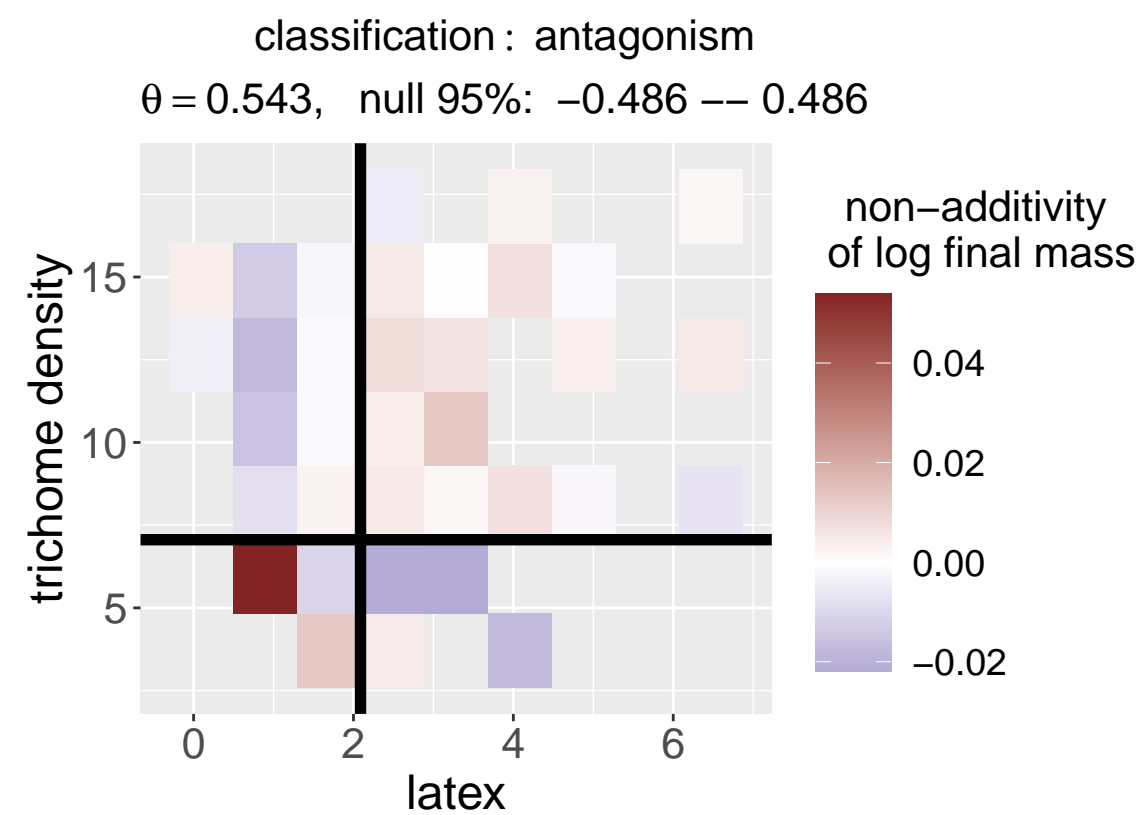

**(d)****Random Forest predictions**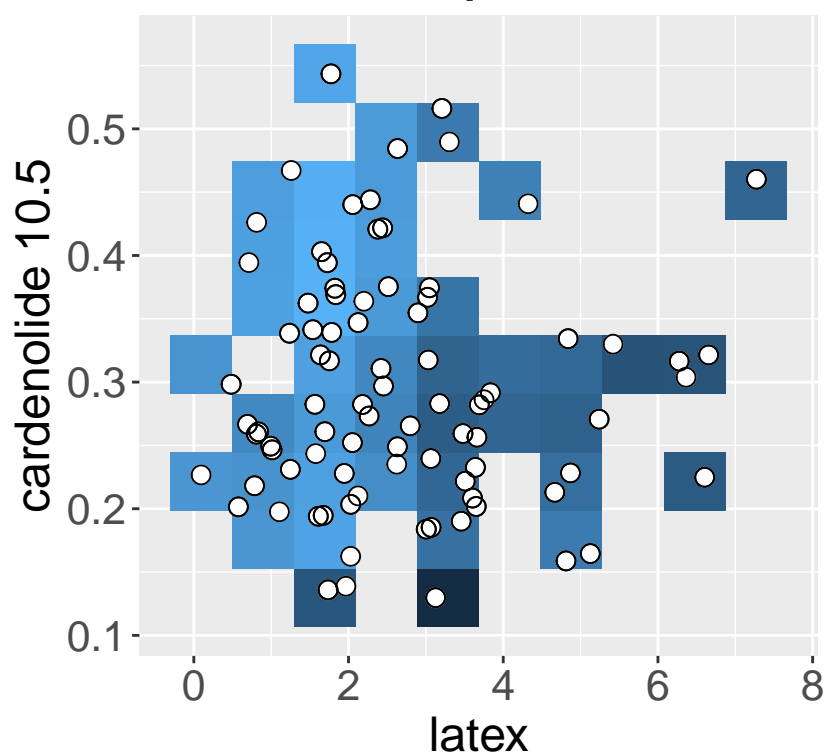**Monarch Growth**

classification : unclear

 $\theta = -0.436$ , null 95%:  $-0.436$  --  $0.436$ 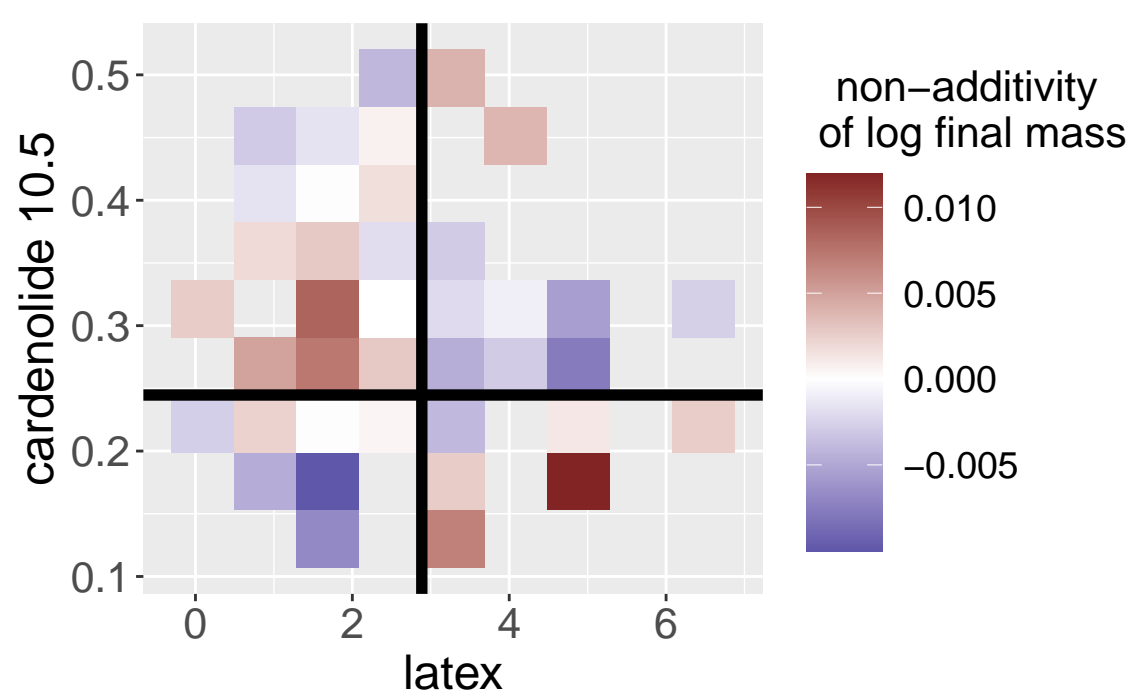**(e)****Random Forest predictions**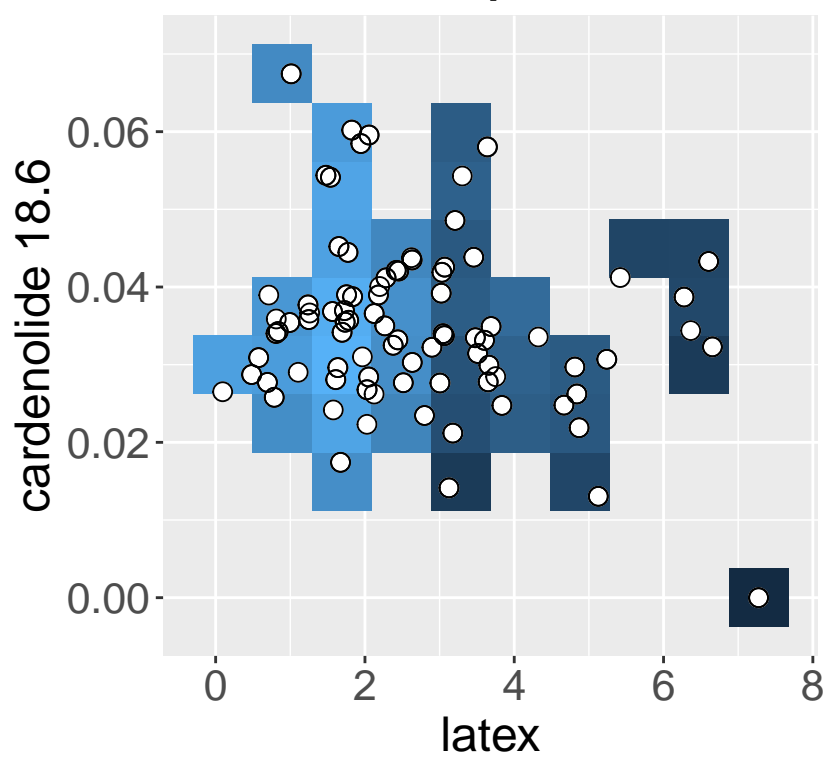**Monarch Growth**

classification : antagonism

 $\theta = 0.6$ , null 95%:  $-0.533$  --  $0.533$ 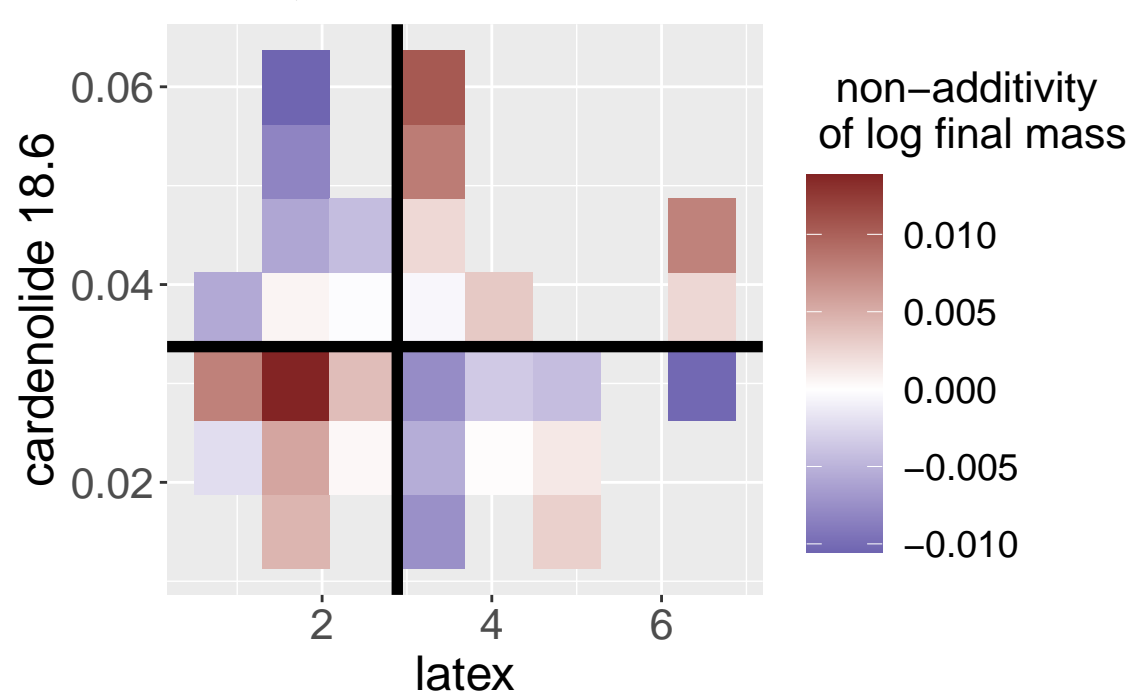**(f)****Random Forest predictions**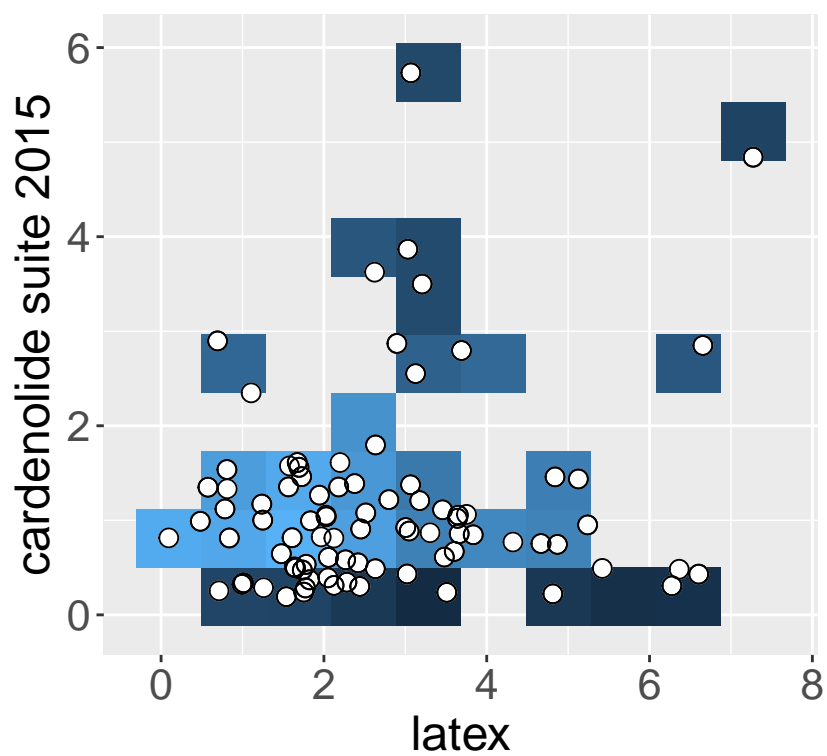**Monarch Growth**

classification : unclear

 $\theta = 0.565$ , null 95%:  $-0.565$  --  $0.565$ 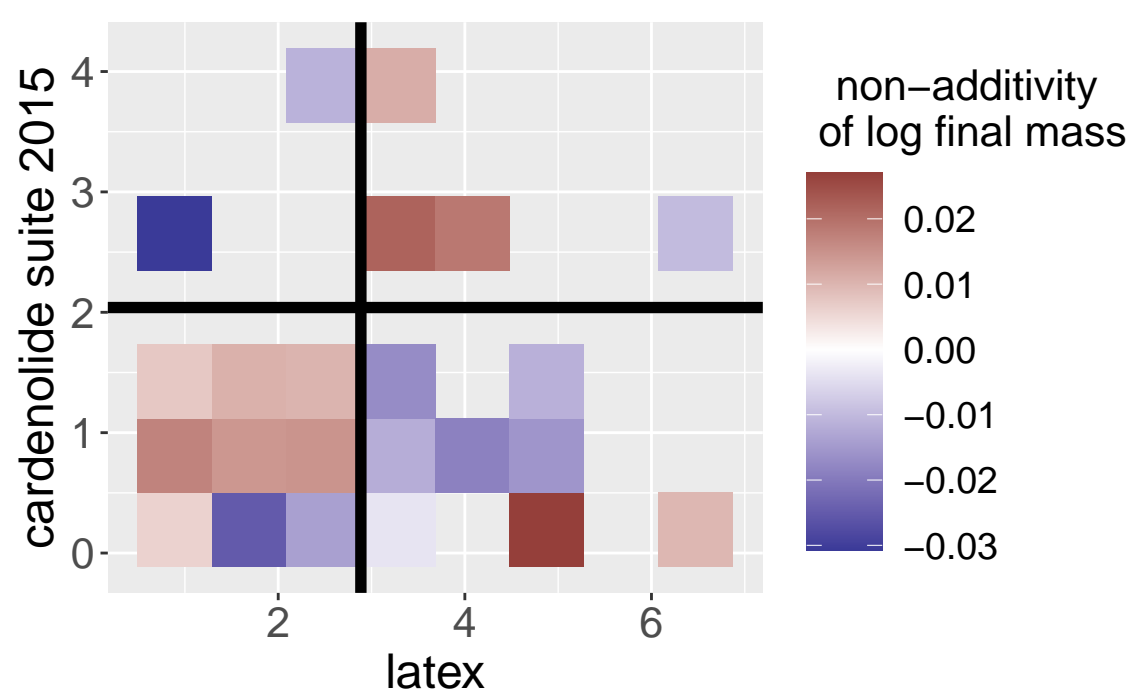

**(g)**

Monarch Growth

Random Forest predictions

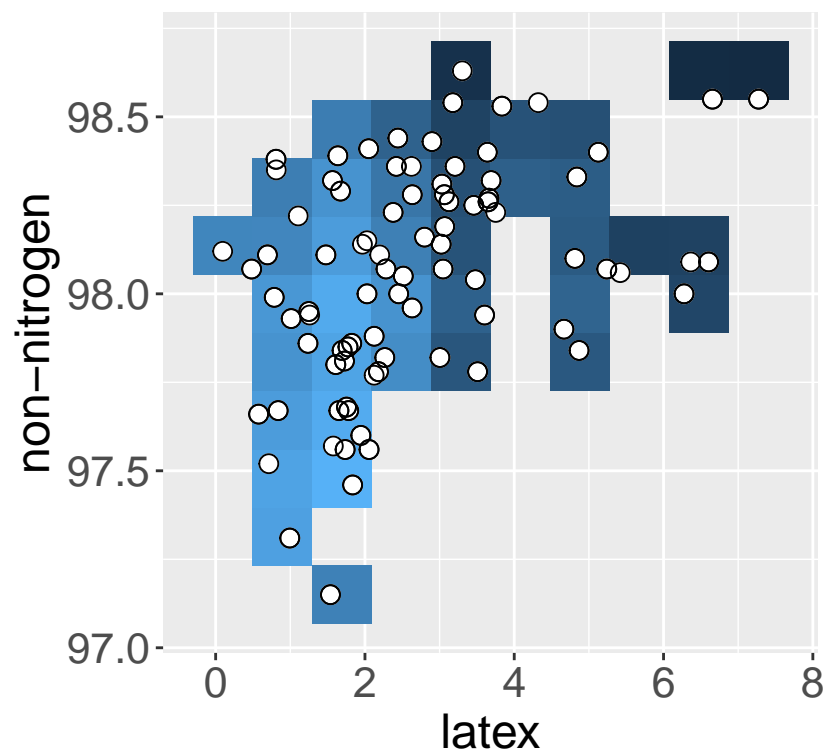

log final mass

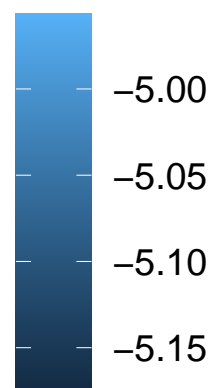

classification : antagonism

 $\theta = 0.588$ , null 95%: -0.412 -- 0.471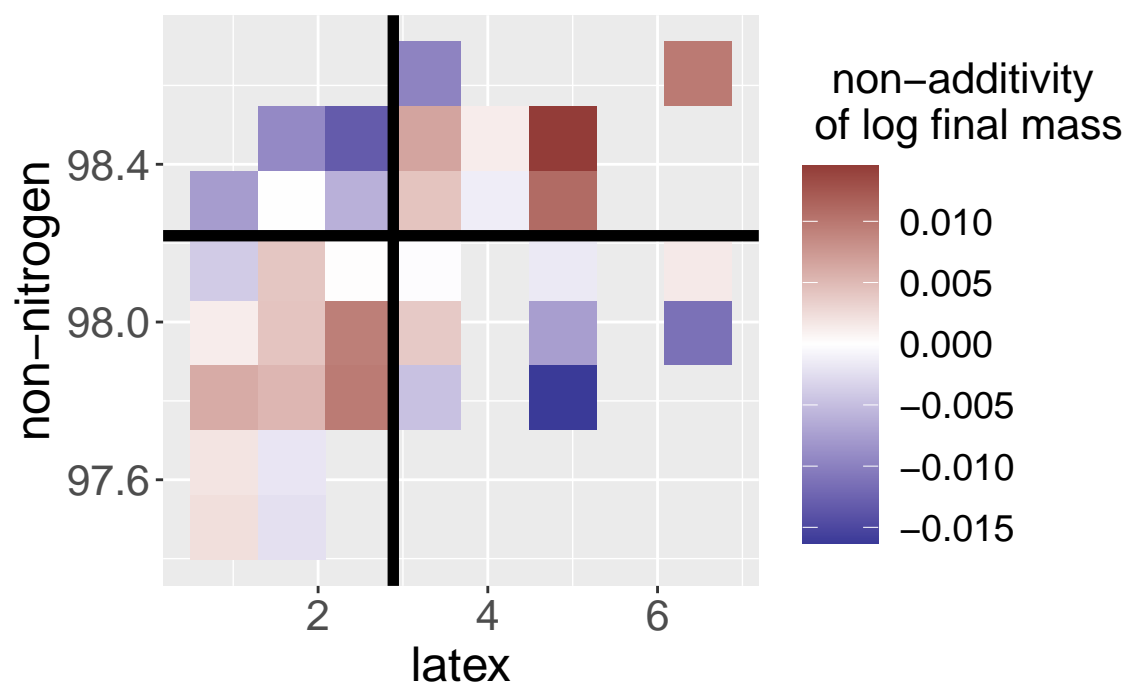non-additivity  
of log final mass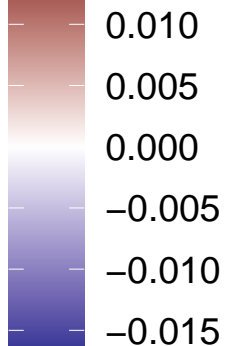**(h)**

Monarch Growth

Random Forest predictions

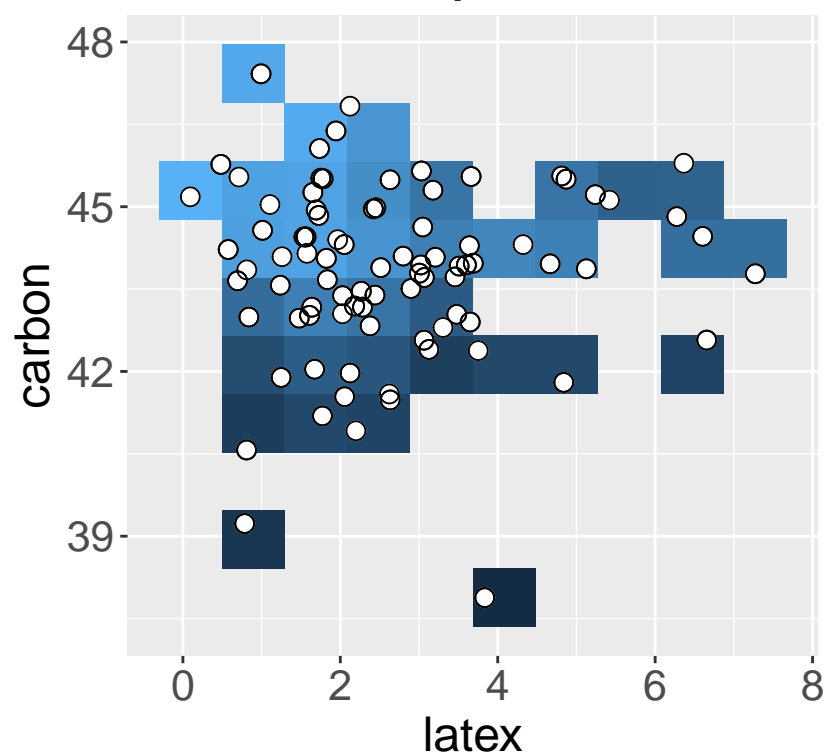

log final mass

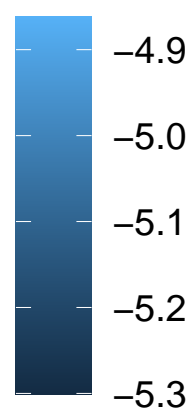

classification : unclear

 $\theta = -0.517$ , null 95%: -0.517 -- 0.517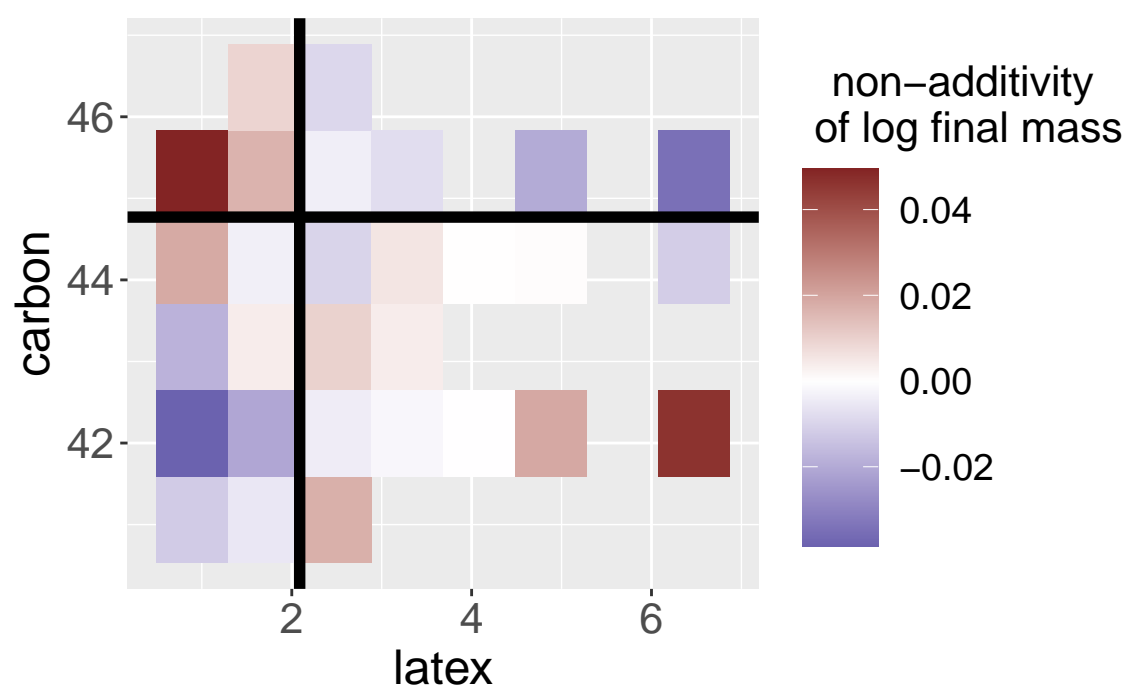non-additivity  
of log final mass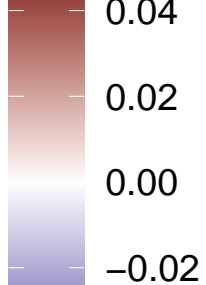**(i)**

Monarch Growth

Random Forest predictions

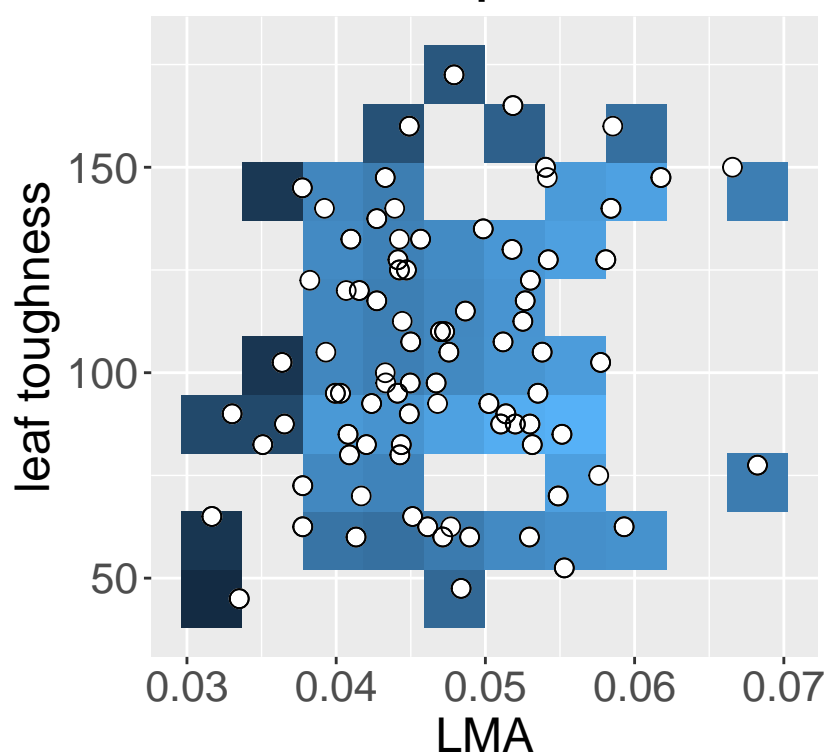

log final mass

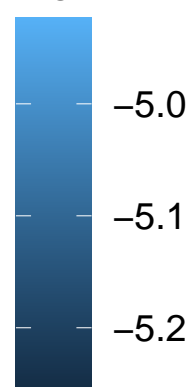

classification : unclear

 $\theta = 0.364$ , null 95%: -0.409 -- 0.455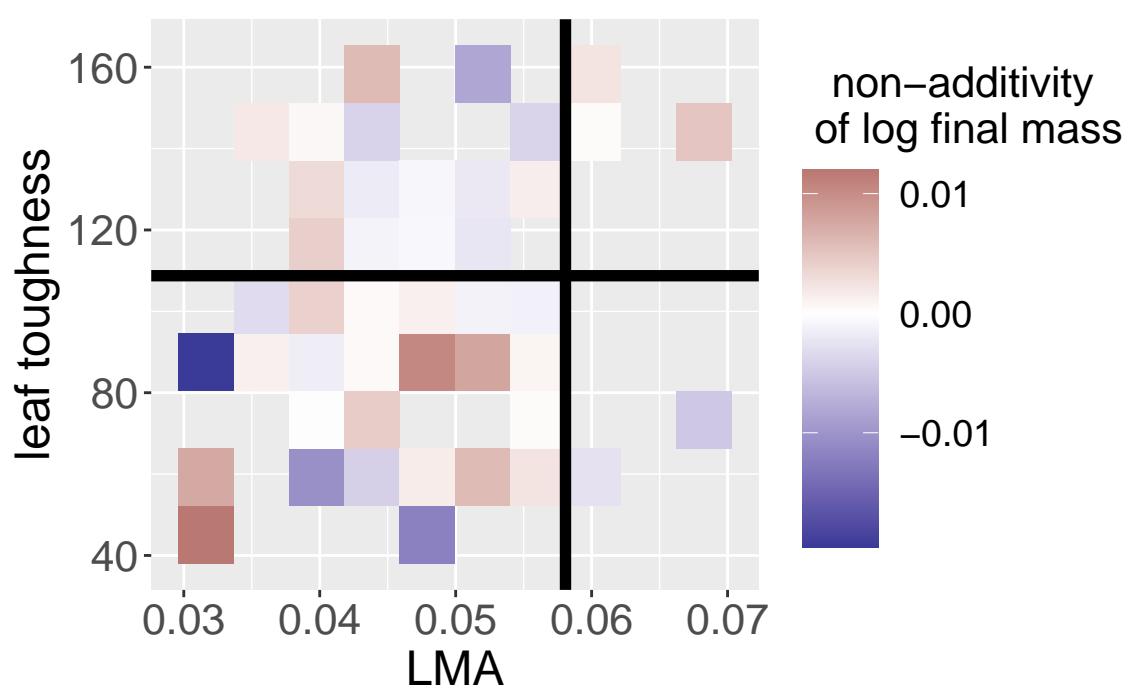non-additivity  
of log final mass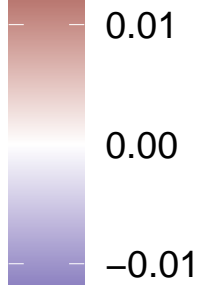

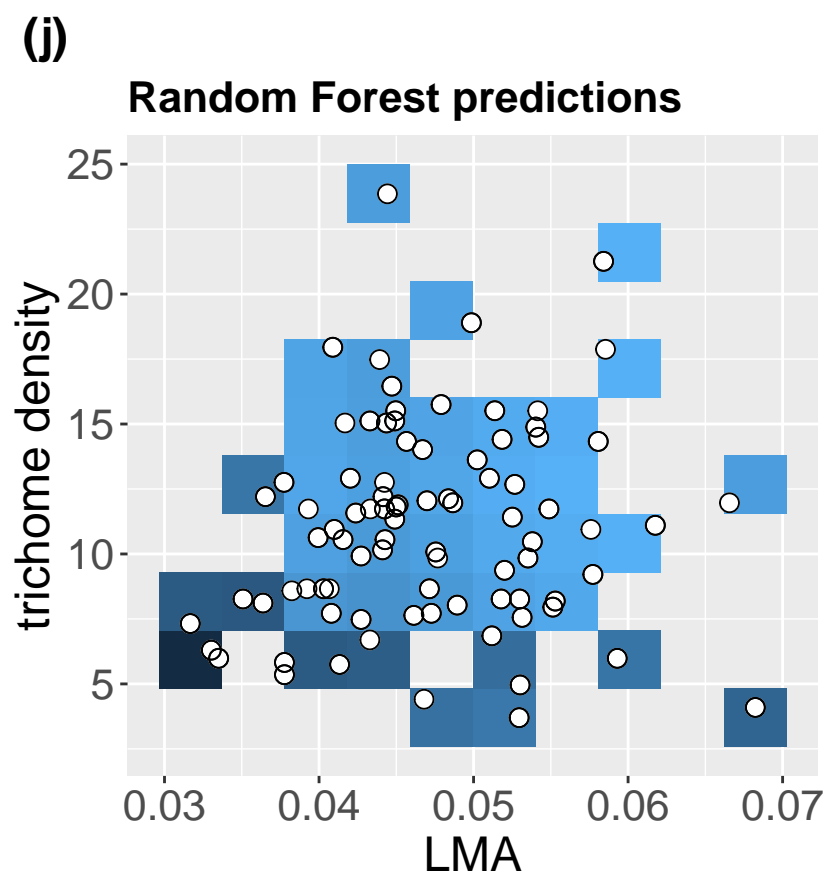

Monarch Growth

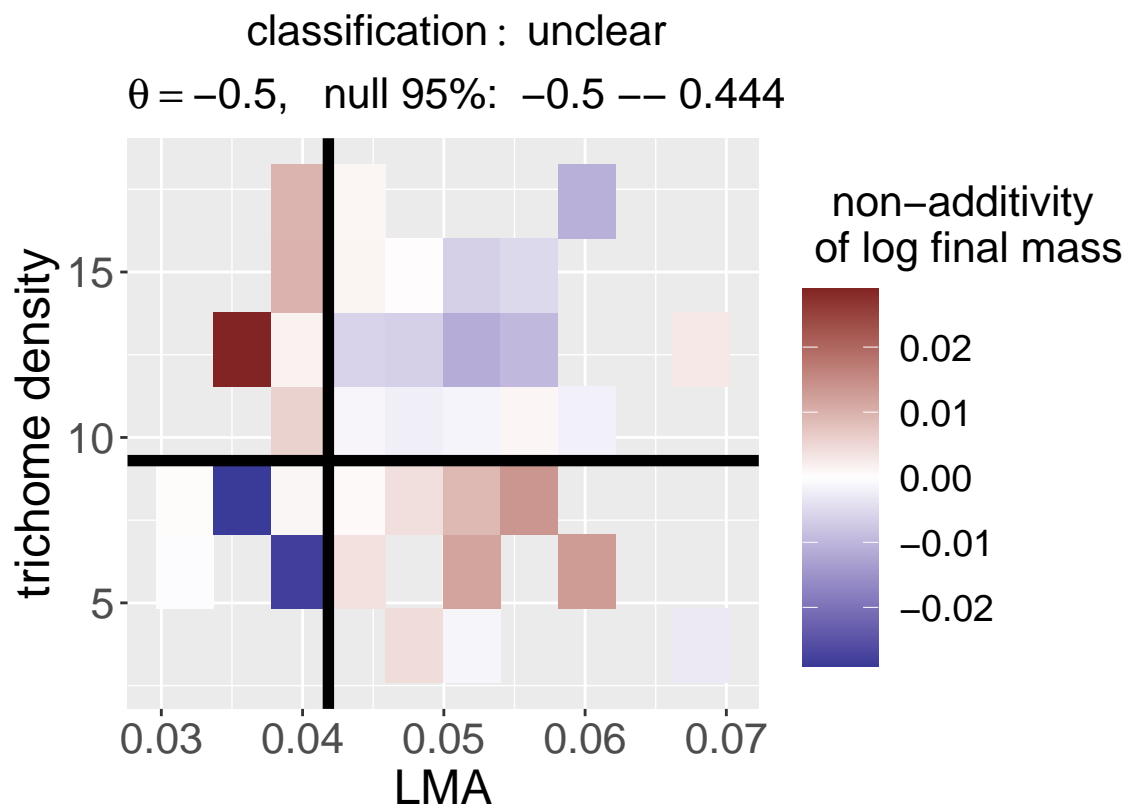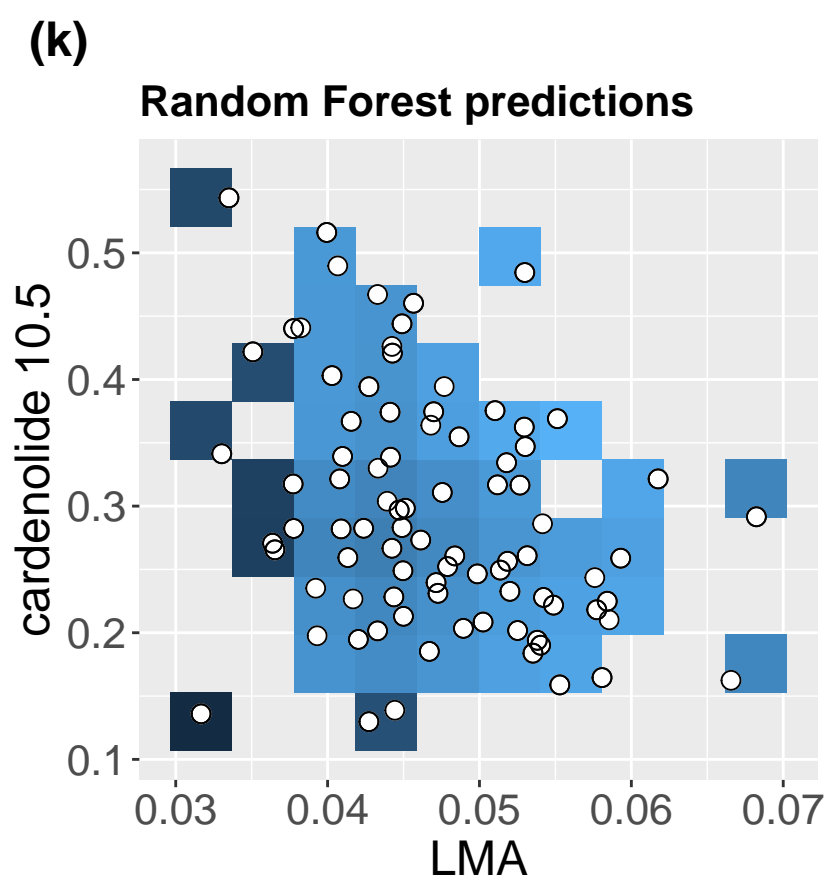

Monarch Growth

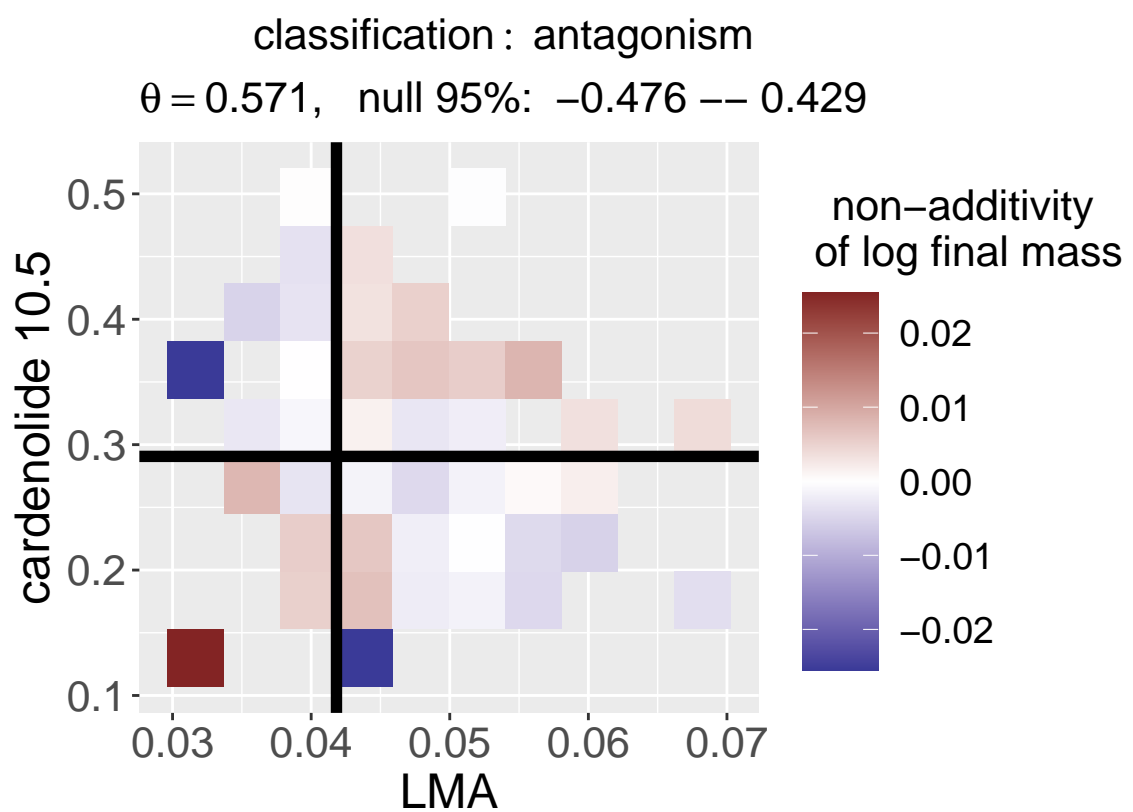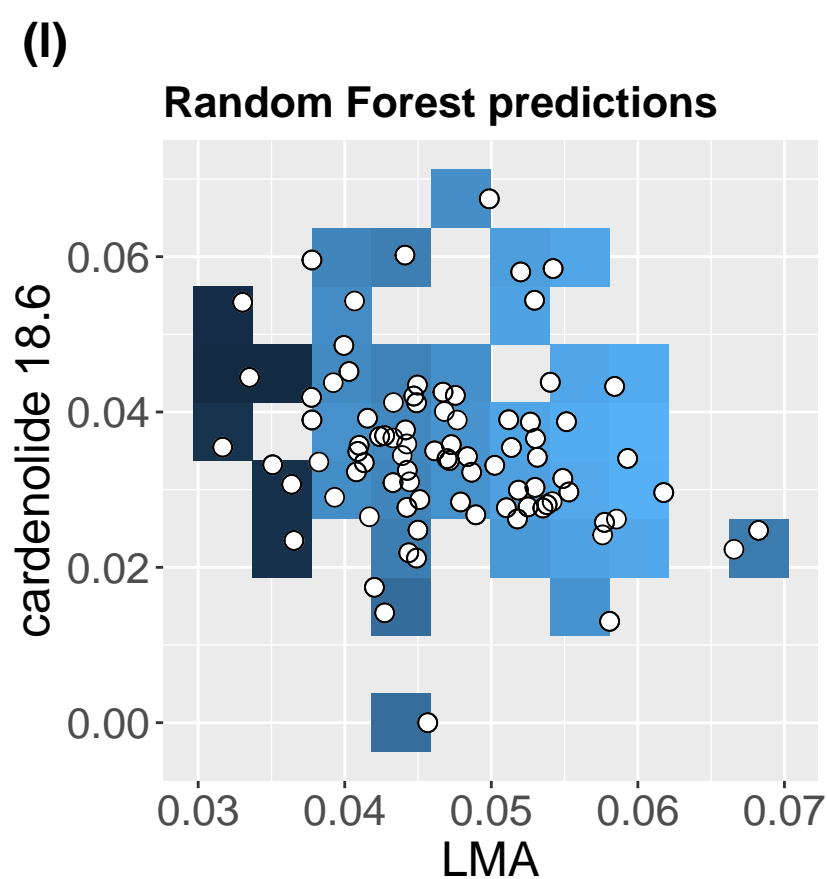

Monarch Growth

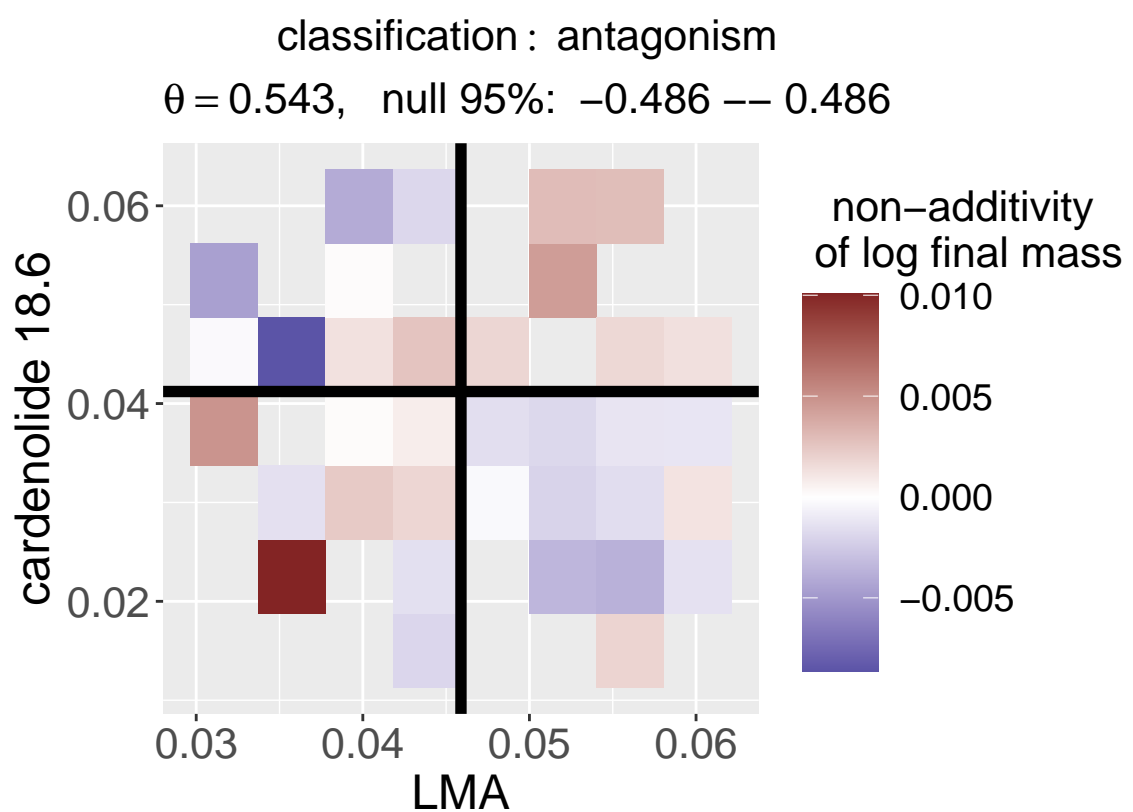

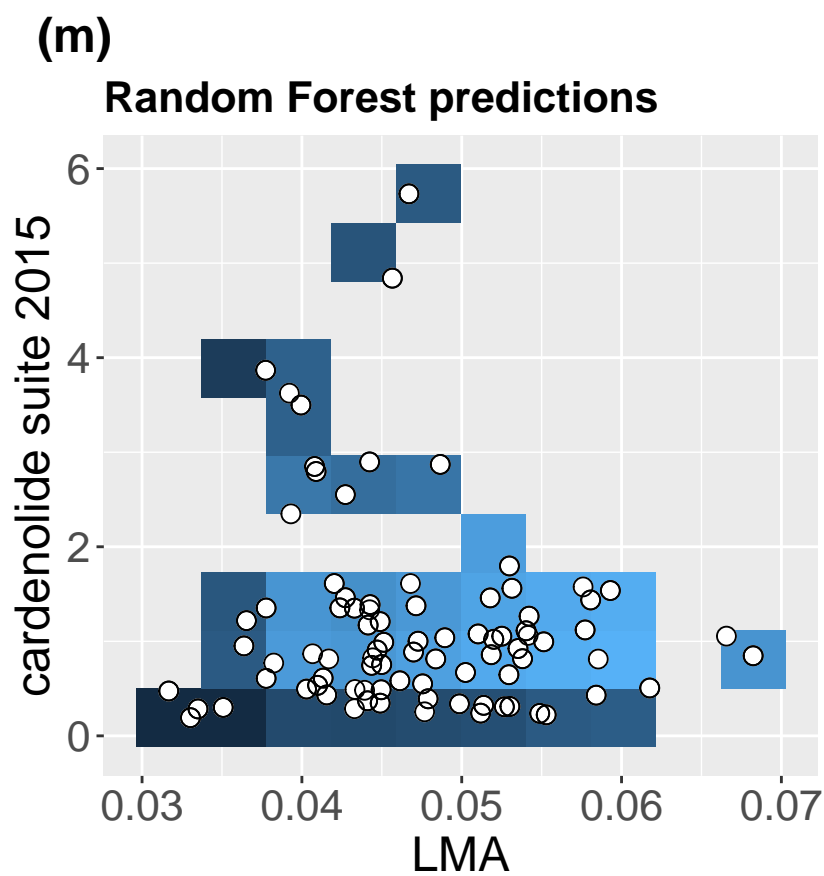

Monarch Growth

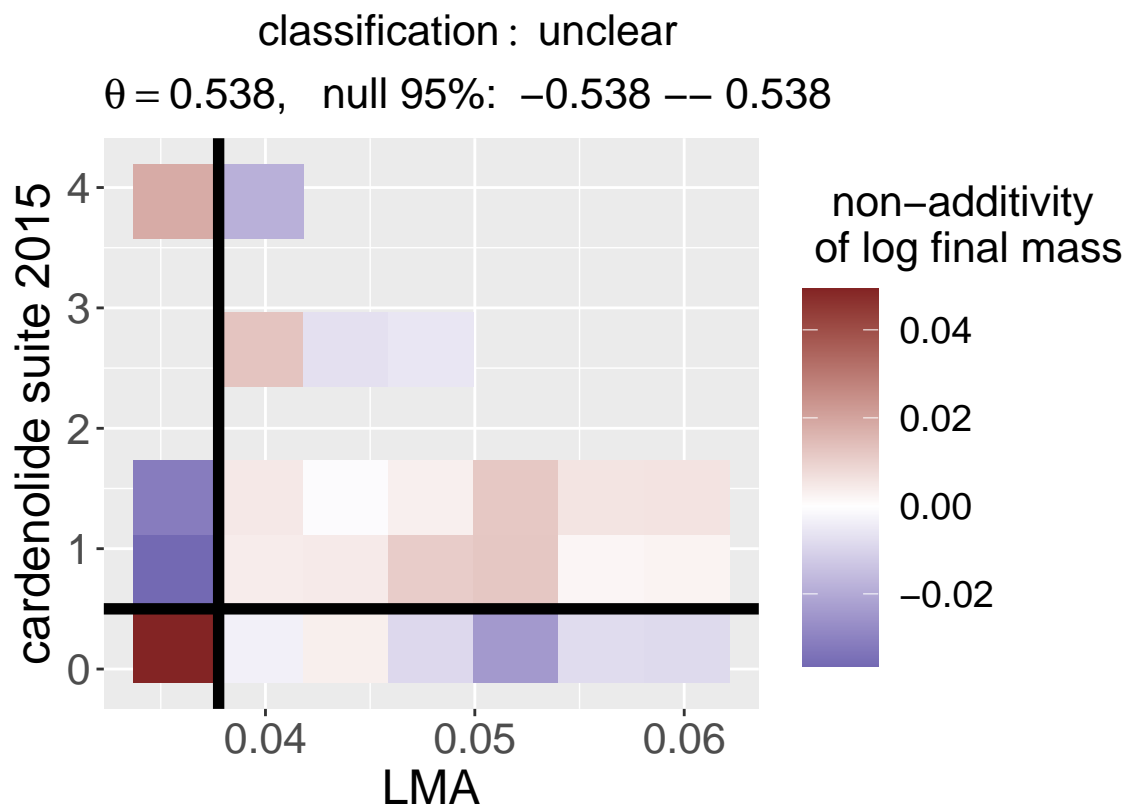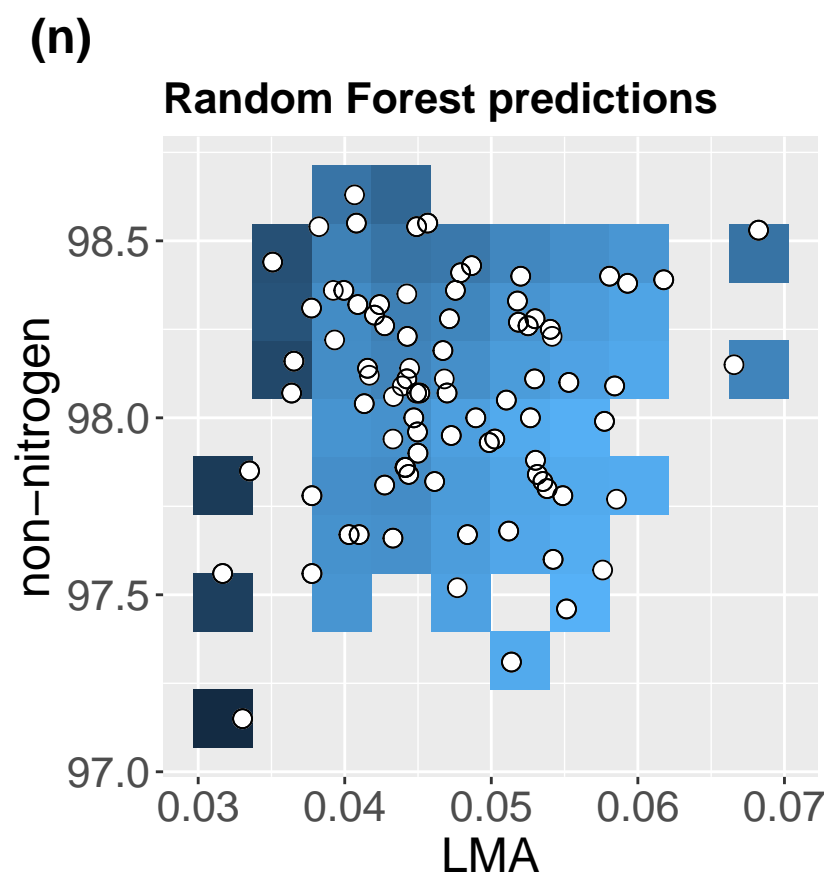

Monarch Growth

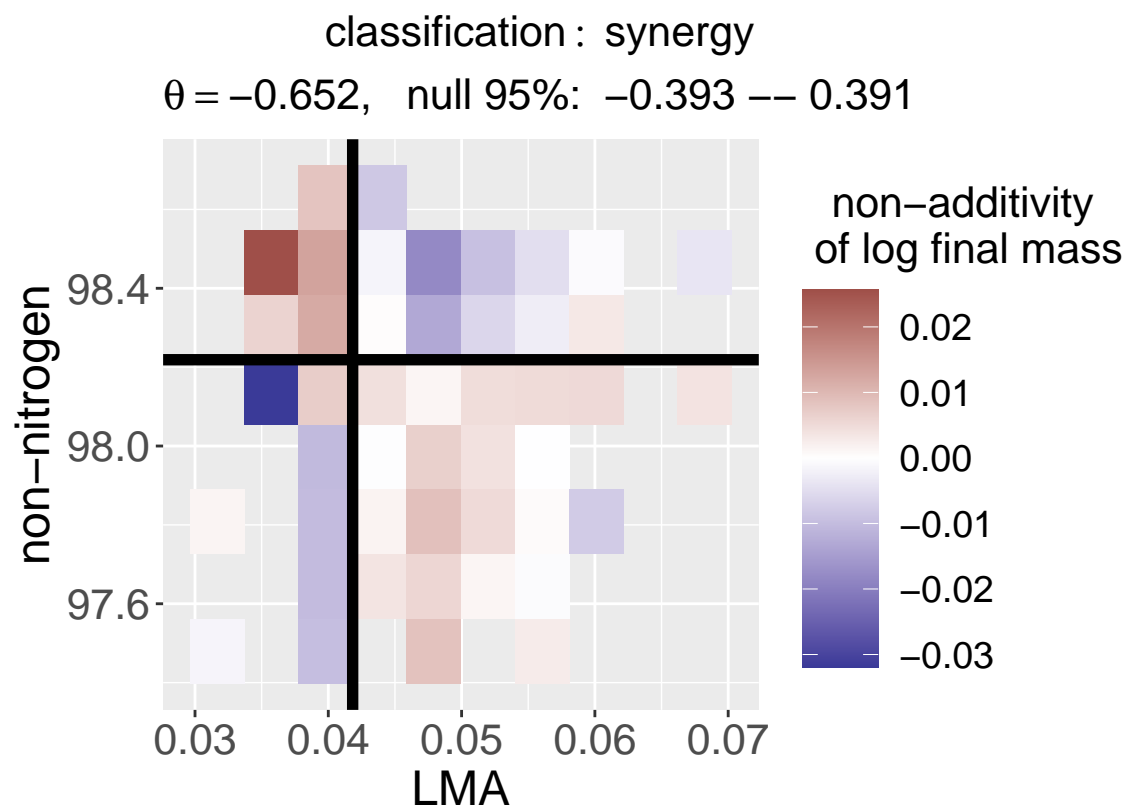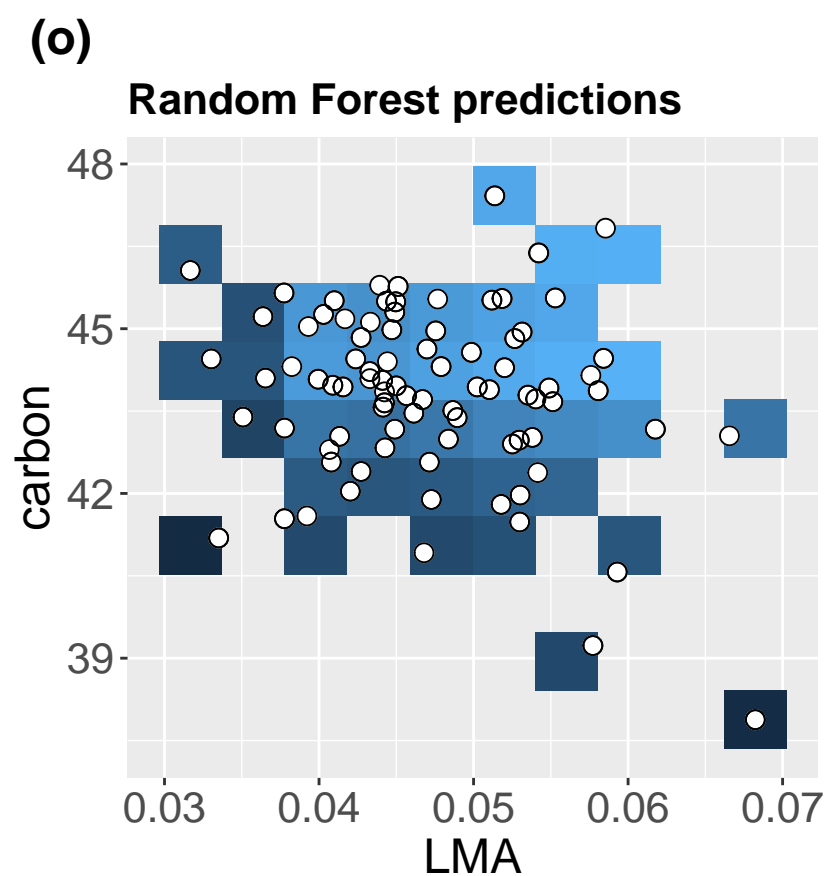

Monarch Growth

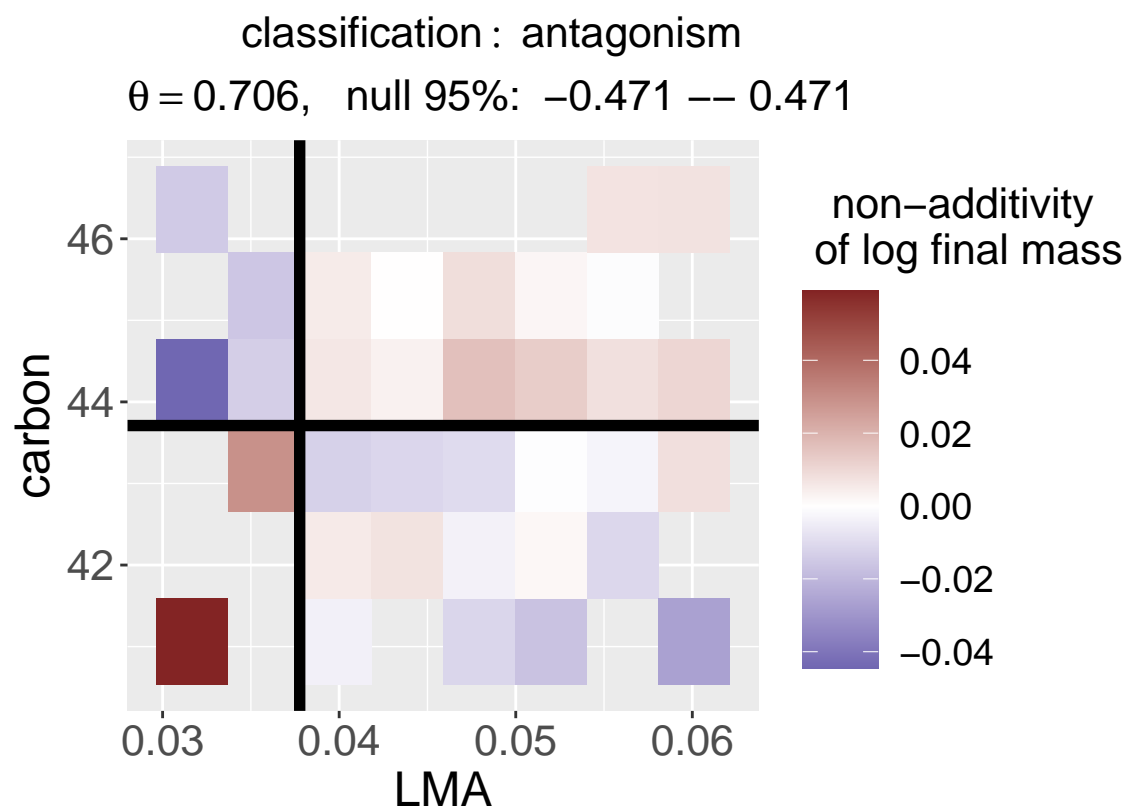

**(p)**

Monarch Growth

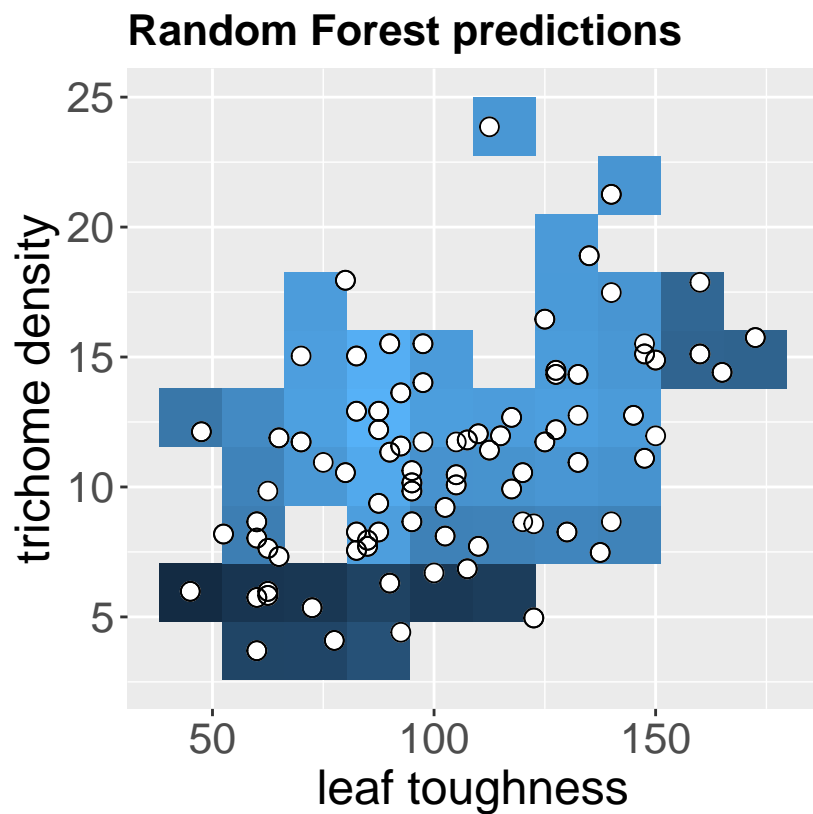

classification : antagonism

 $\theta = 0.55$ , null 95%: -0.4 -- 0.45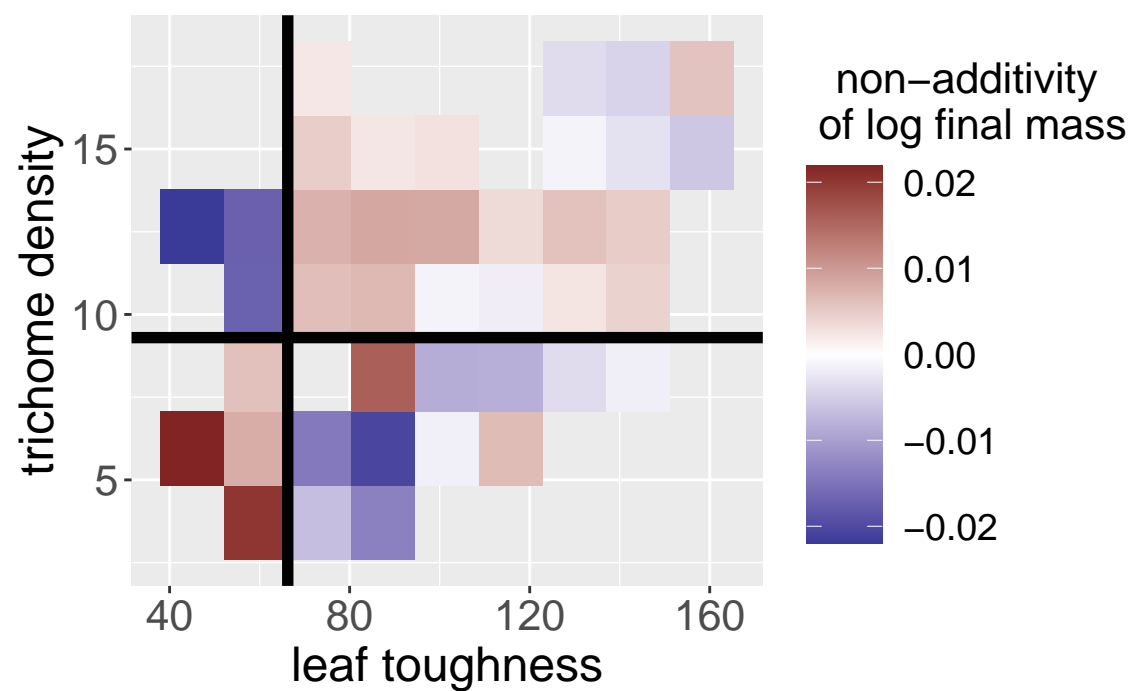**(q)**

Monarch Growth

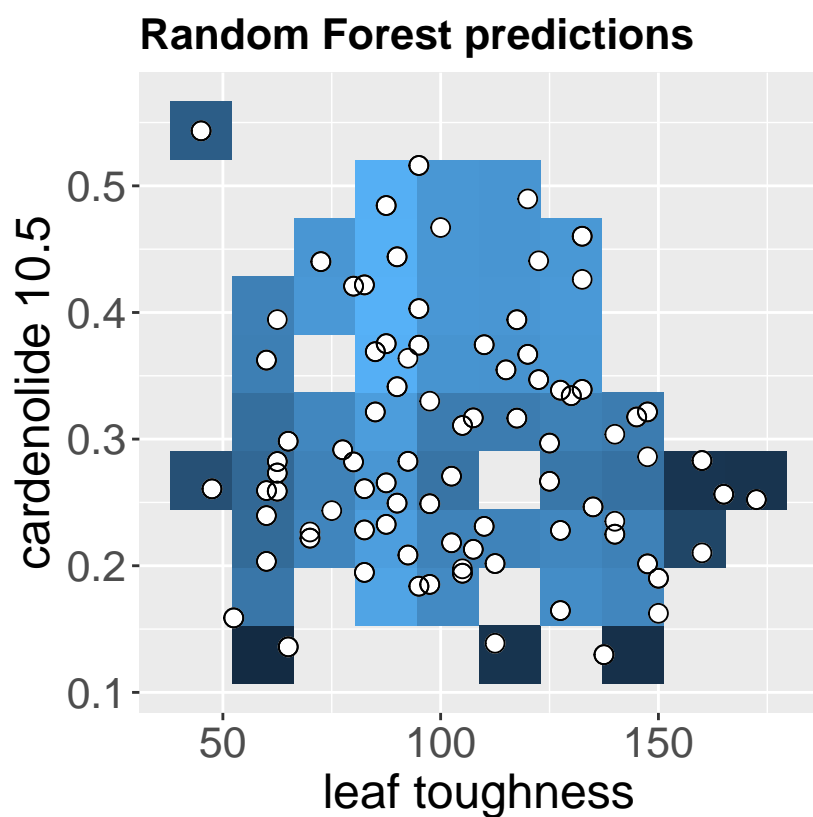

classification : antagonism

 $\theta = 0.469$ , null 95%: -0.429 -- 0.388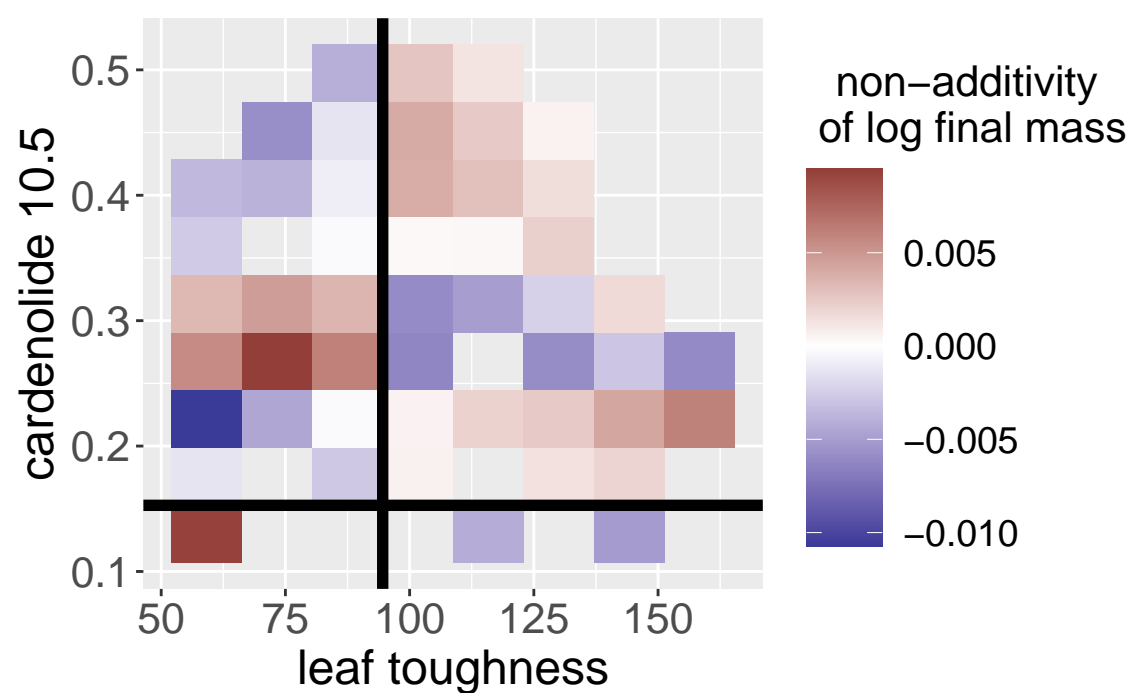**(r)**

Monarch Growth

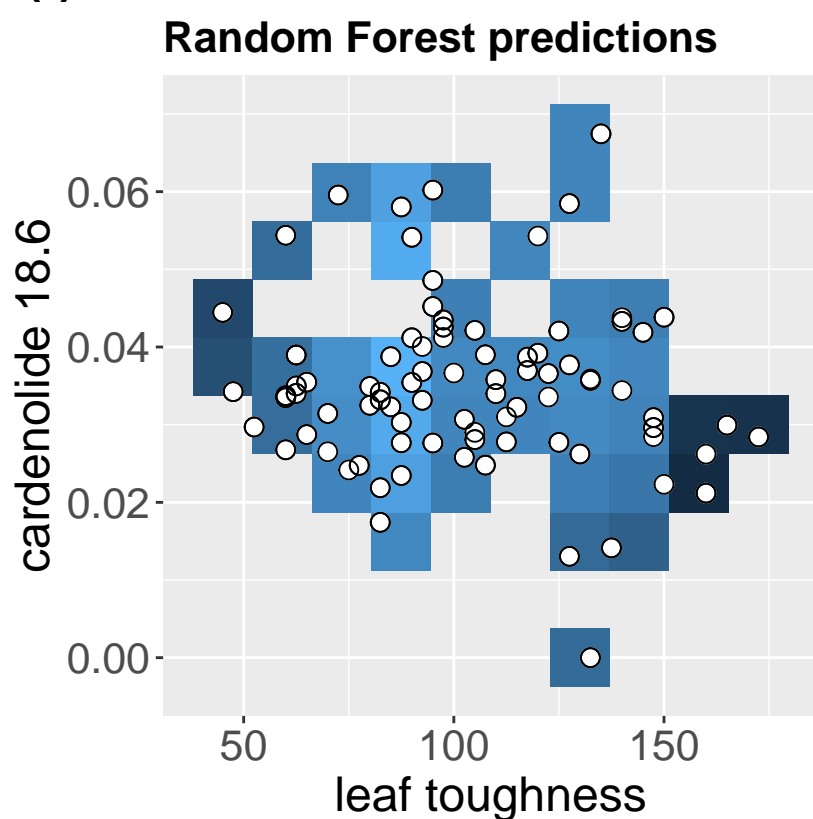

classification : unclear

 $\theta = 0.389$ , null 95%: -0.444 -- 0.444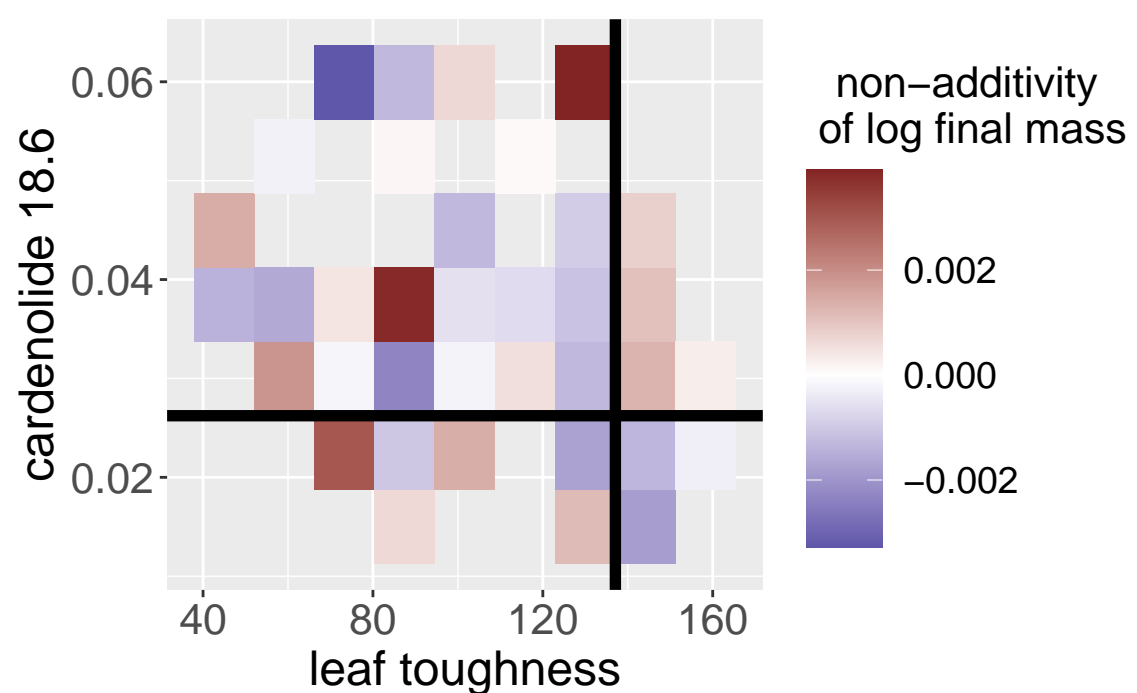

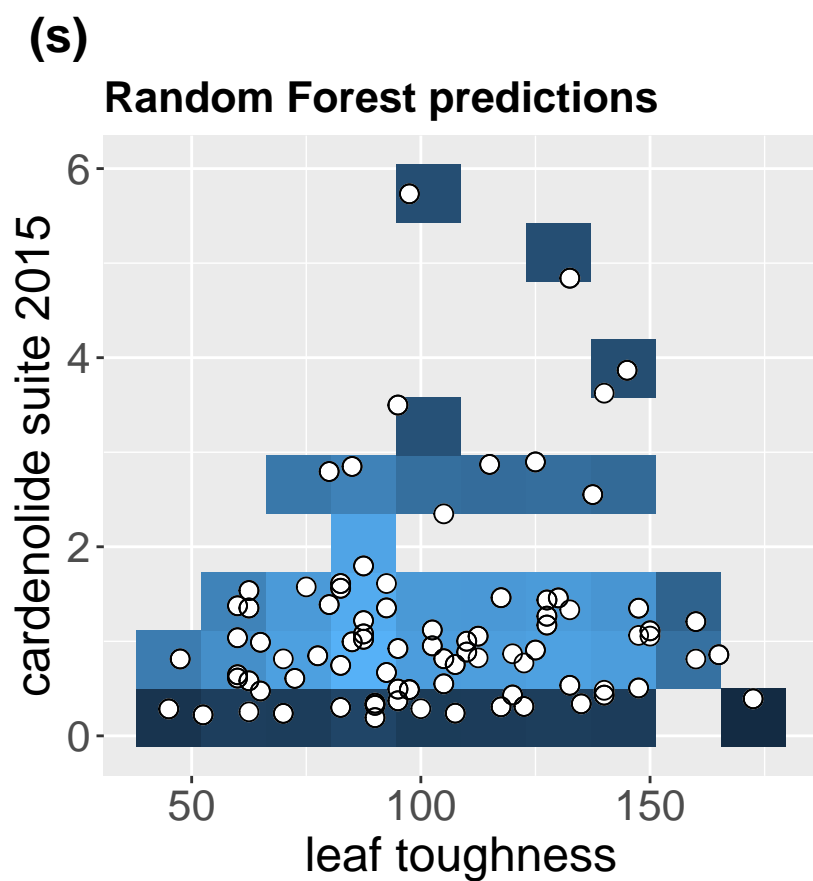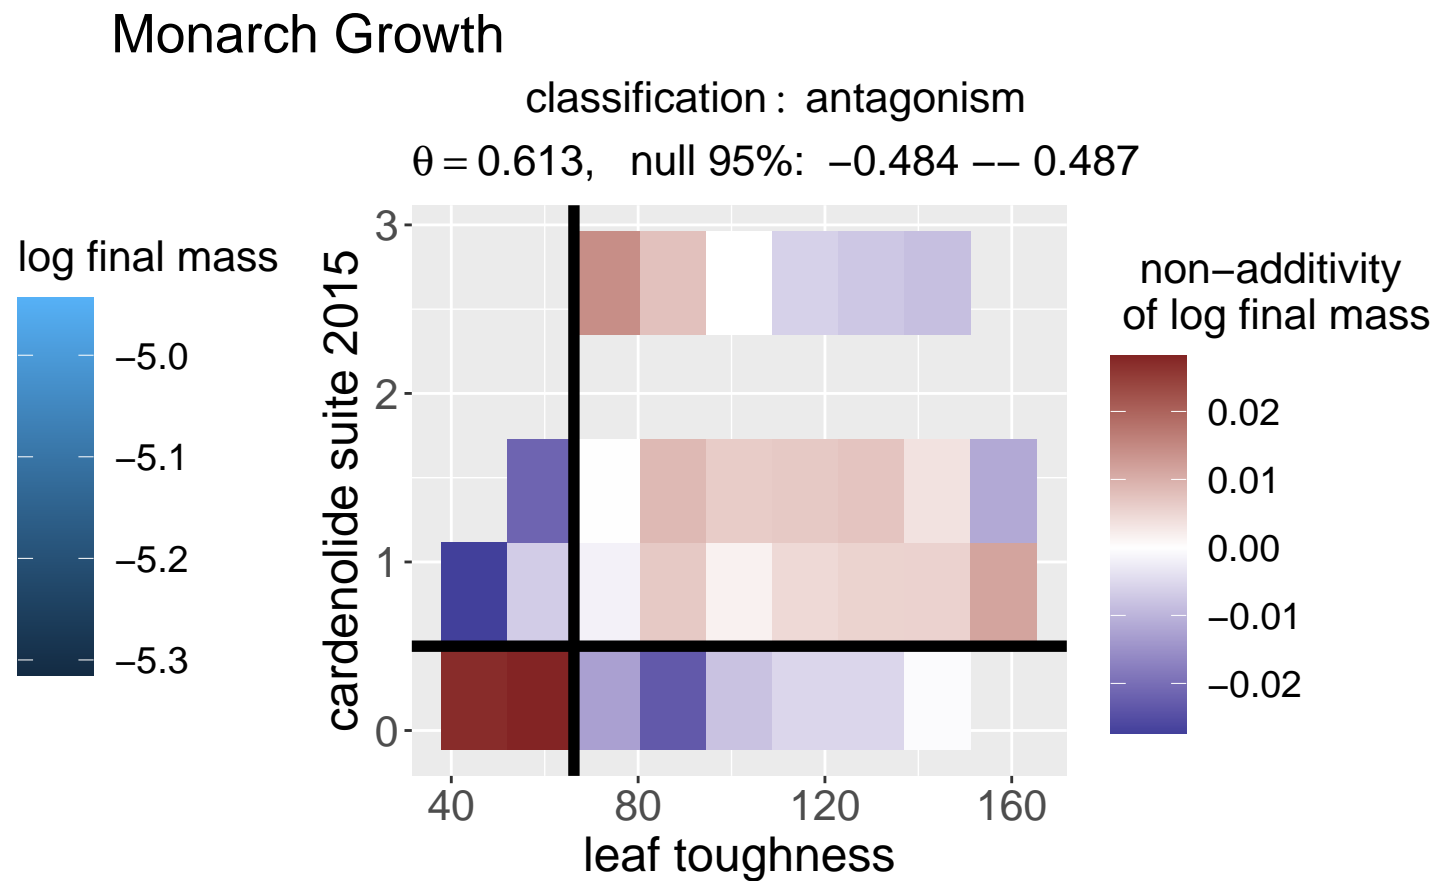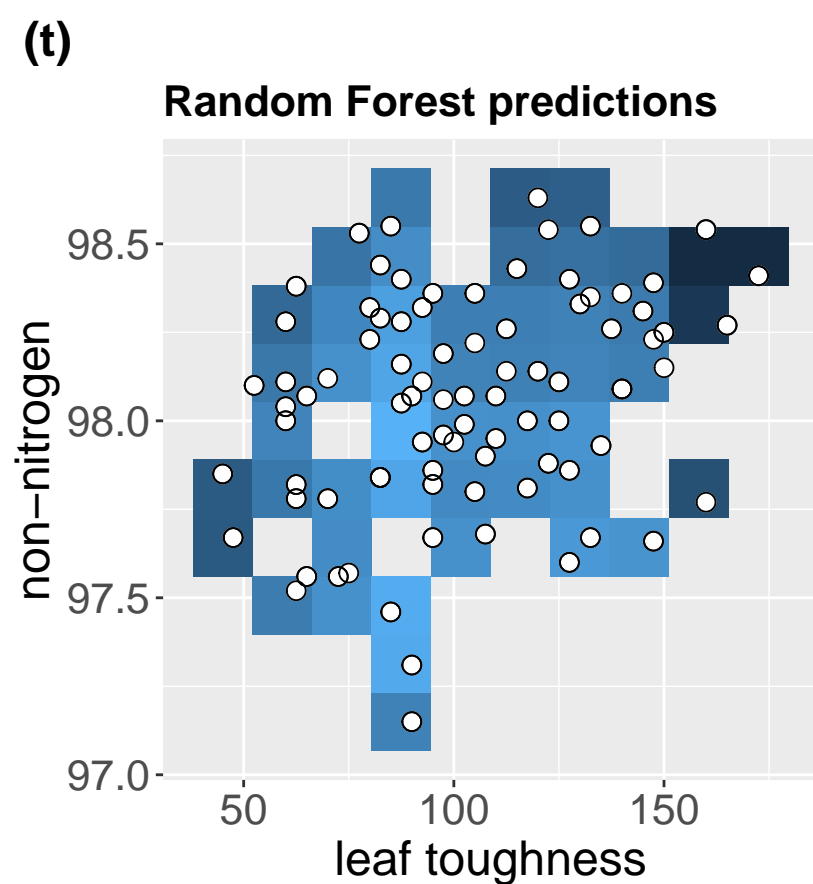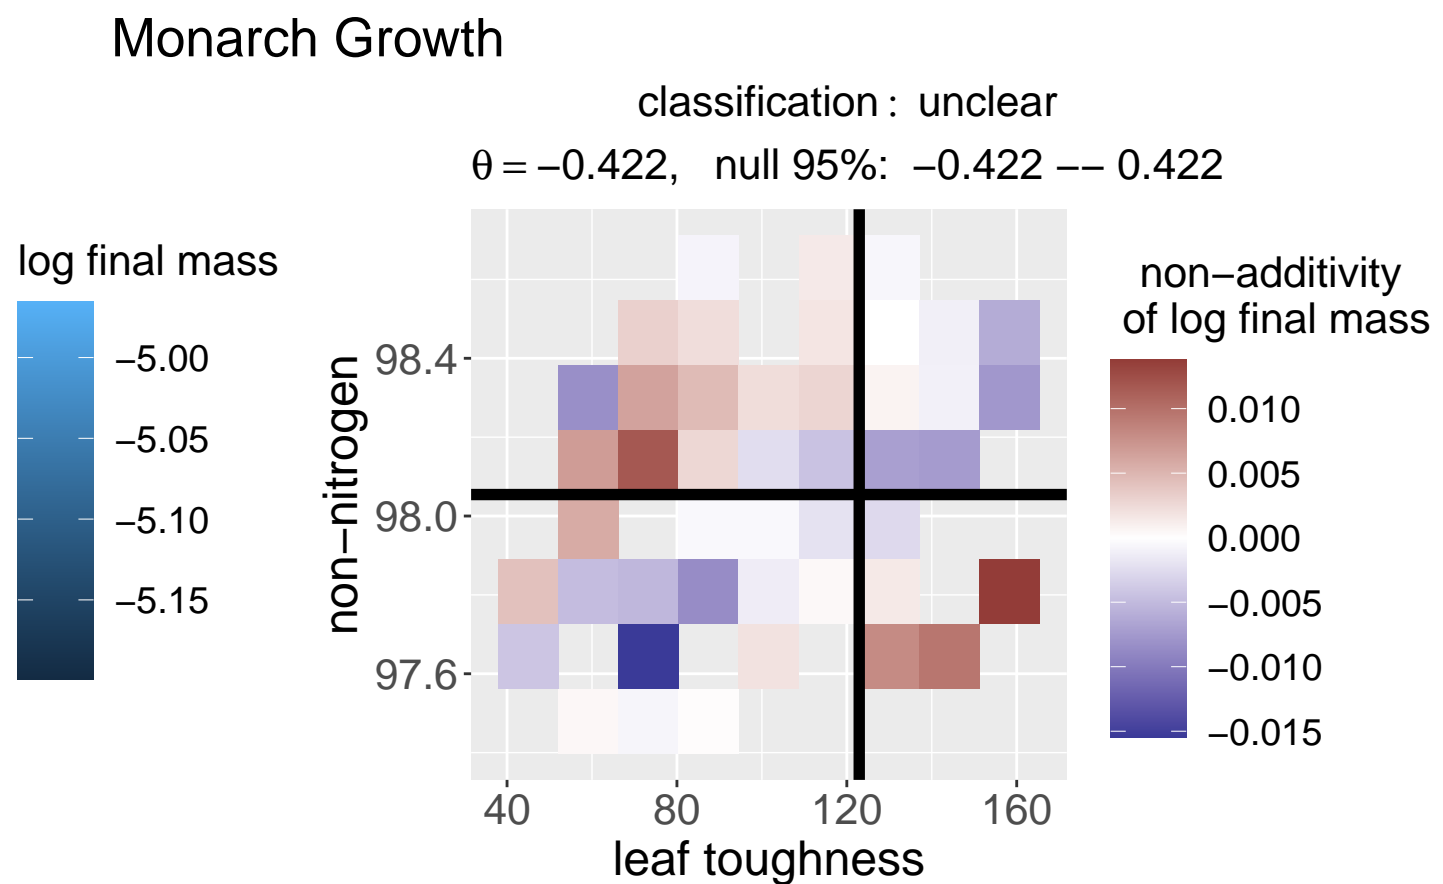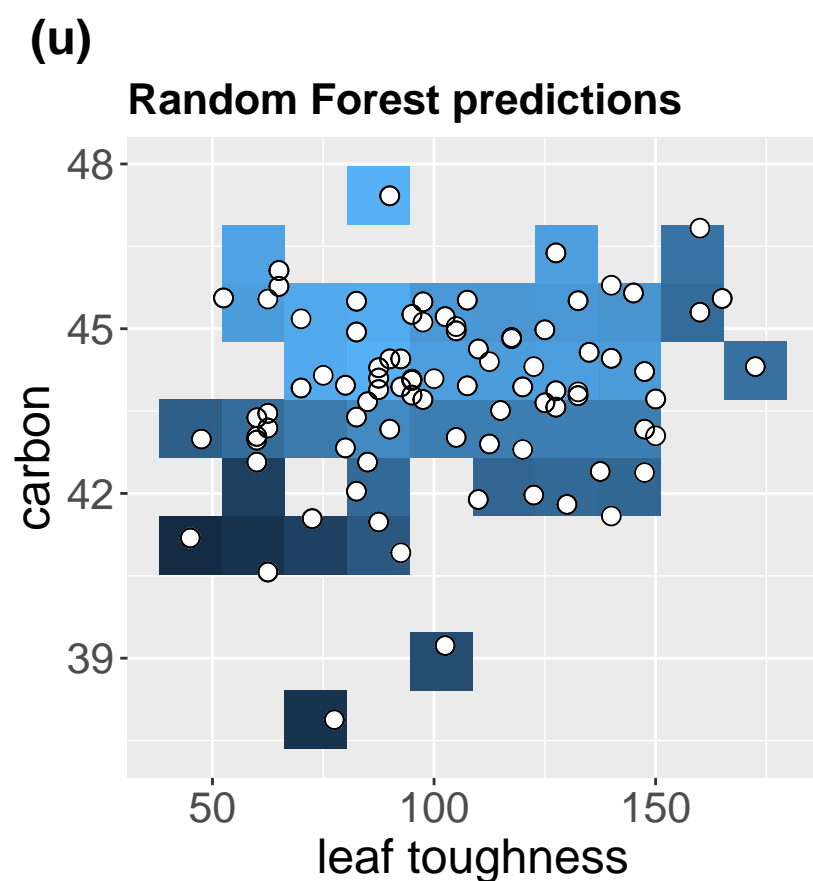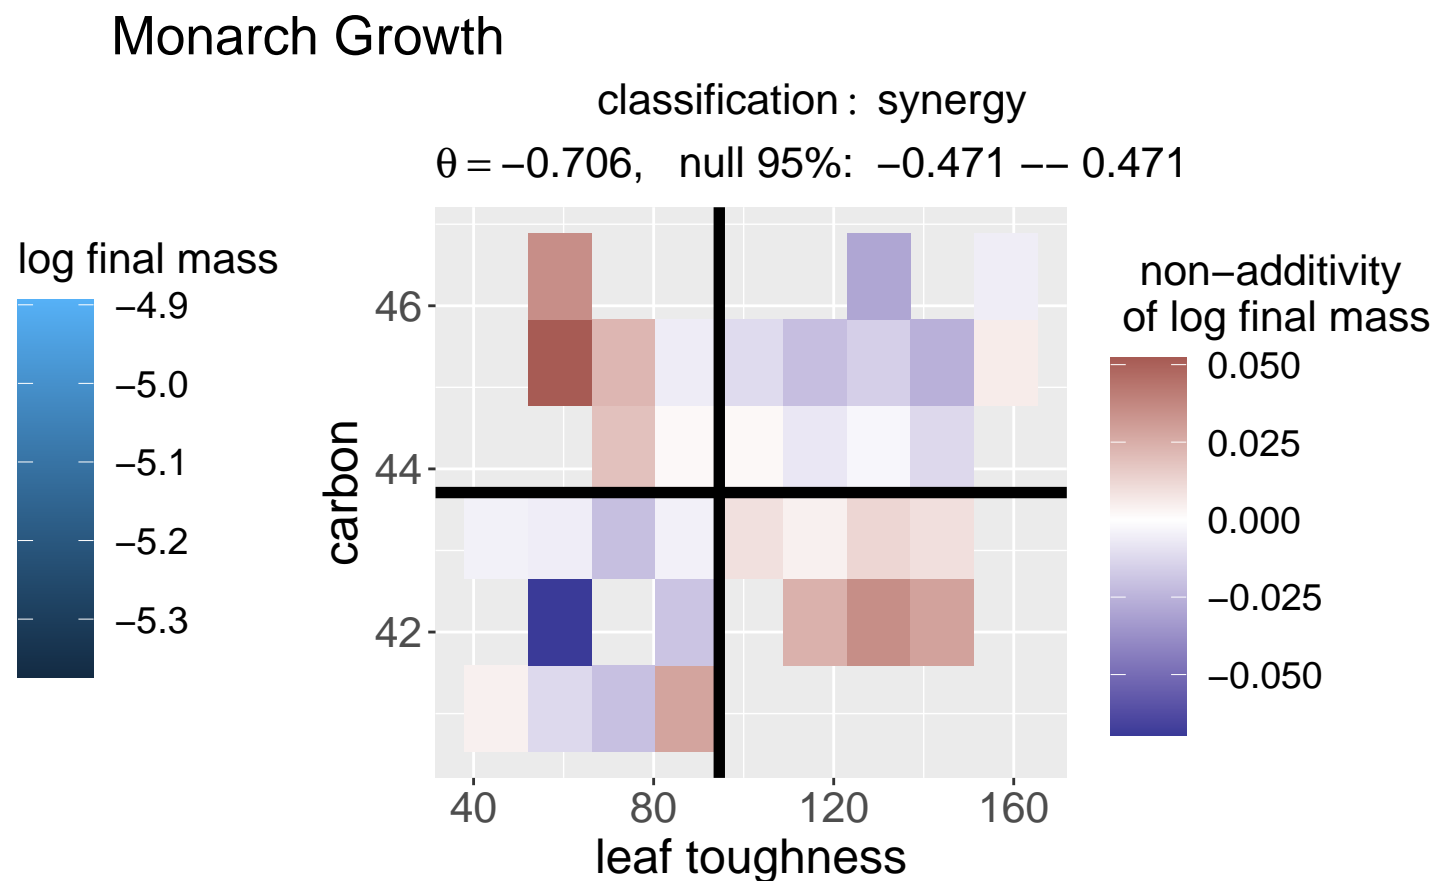

**(v)****Random Forest predictions**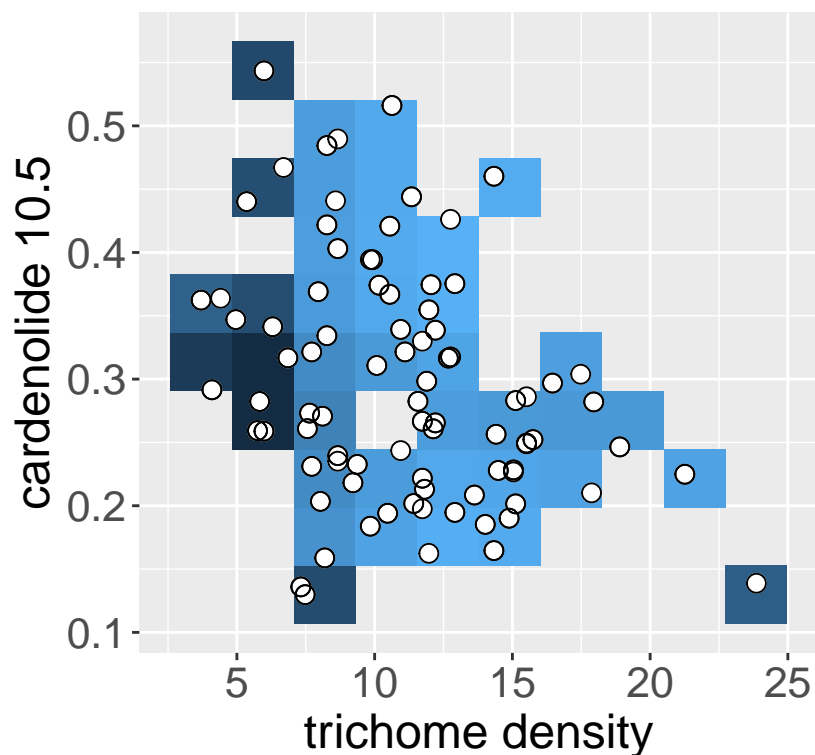**Monarch Growth**

classification : synergy

 $\theta = -0.529$ , null 95%:  $-0.471$  --  $0.471$ 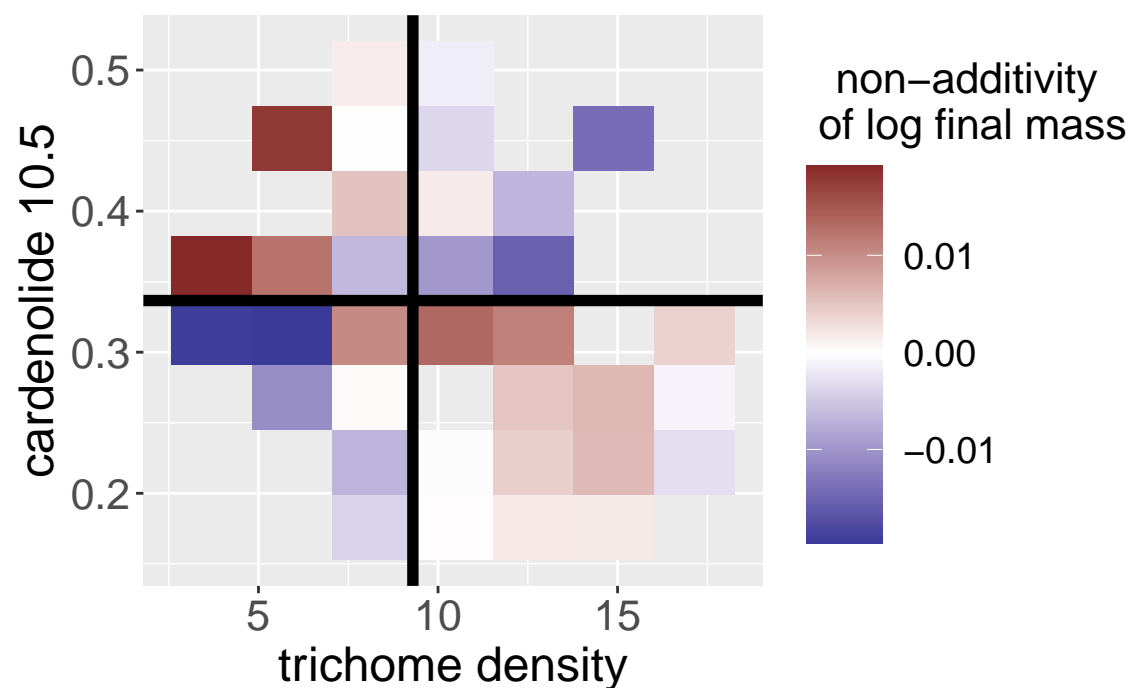**(w)****Random Forest predictions**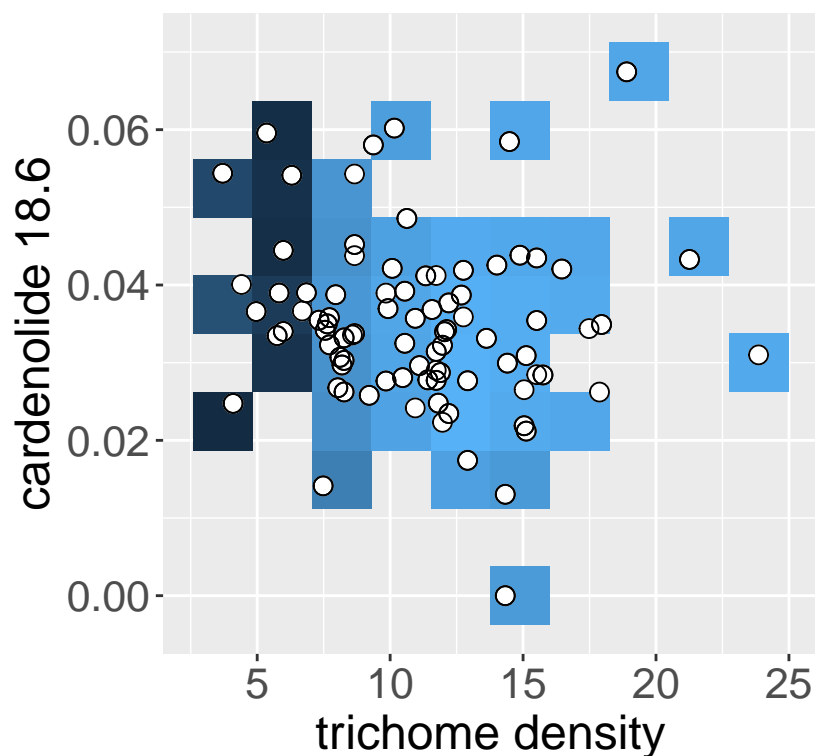**Monarch Growth**

classification : unclear

 $\theta = -0.515$ , null 95%:  $-0.515$  --  $0.515$ 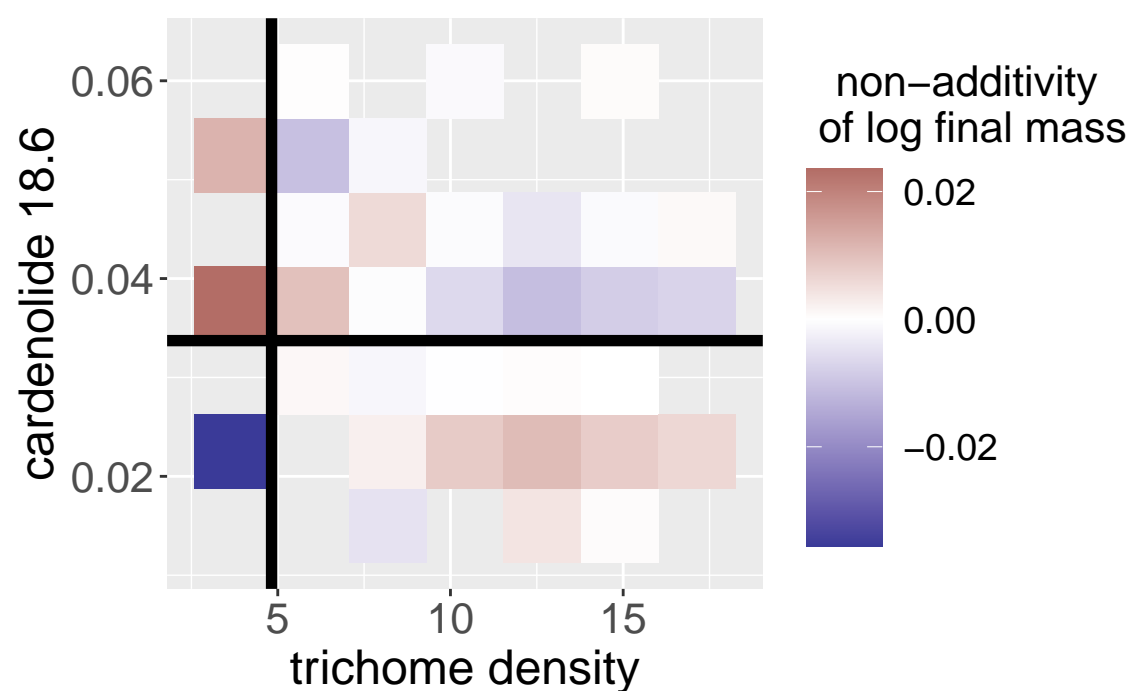**(x)****Random Forest predictions**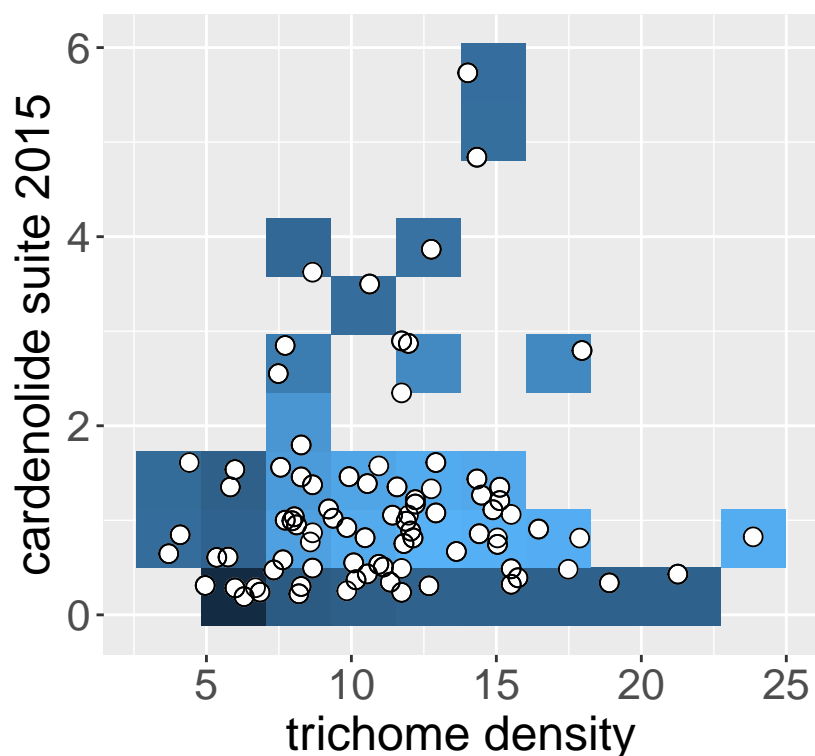**Monarch Growth**

classification : antagonism

 $\theta = 0.75$ , null 95%:  $-0.583$  --  $0.583$ 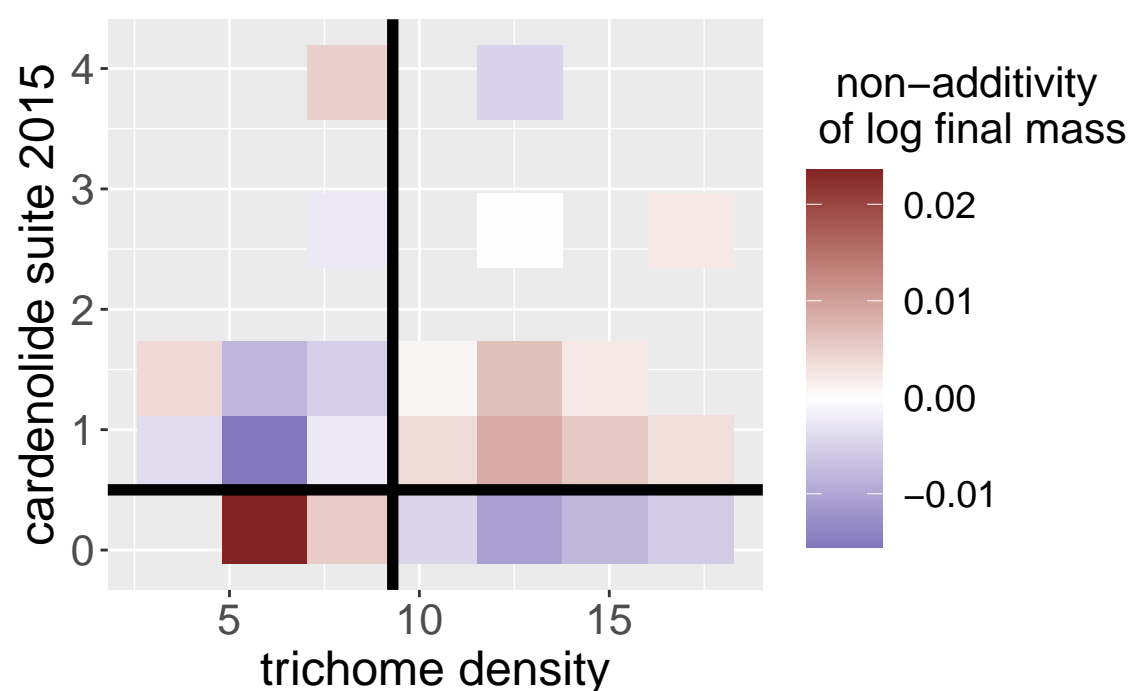



**(y)****Random Forest predictions**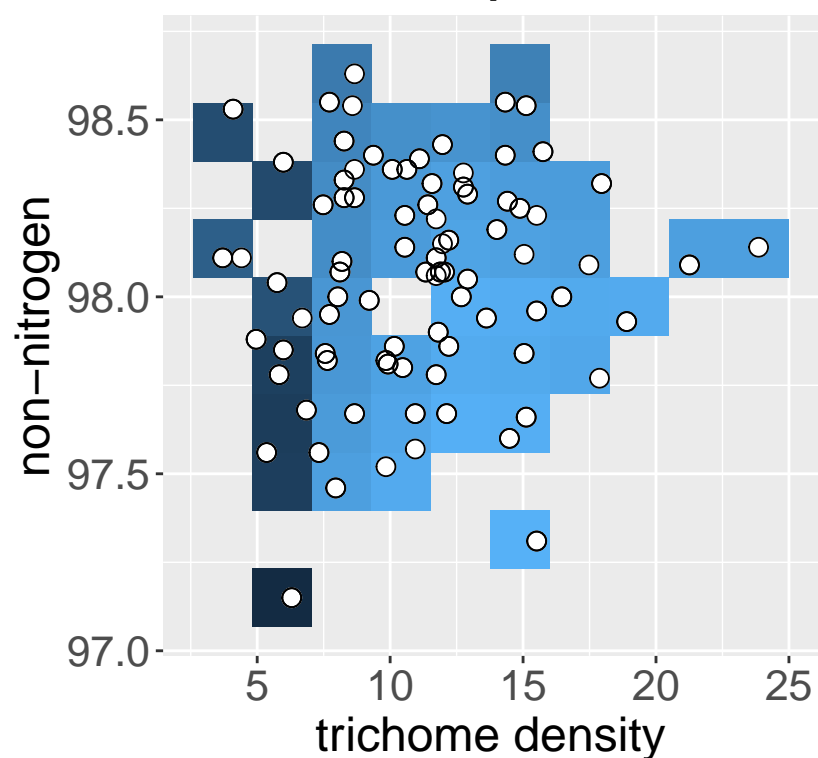**Monarch Growth**

classification : synergy

 $\theta = -0.579$ , null 95%:  $-0.474$  --  $0.474$ 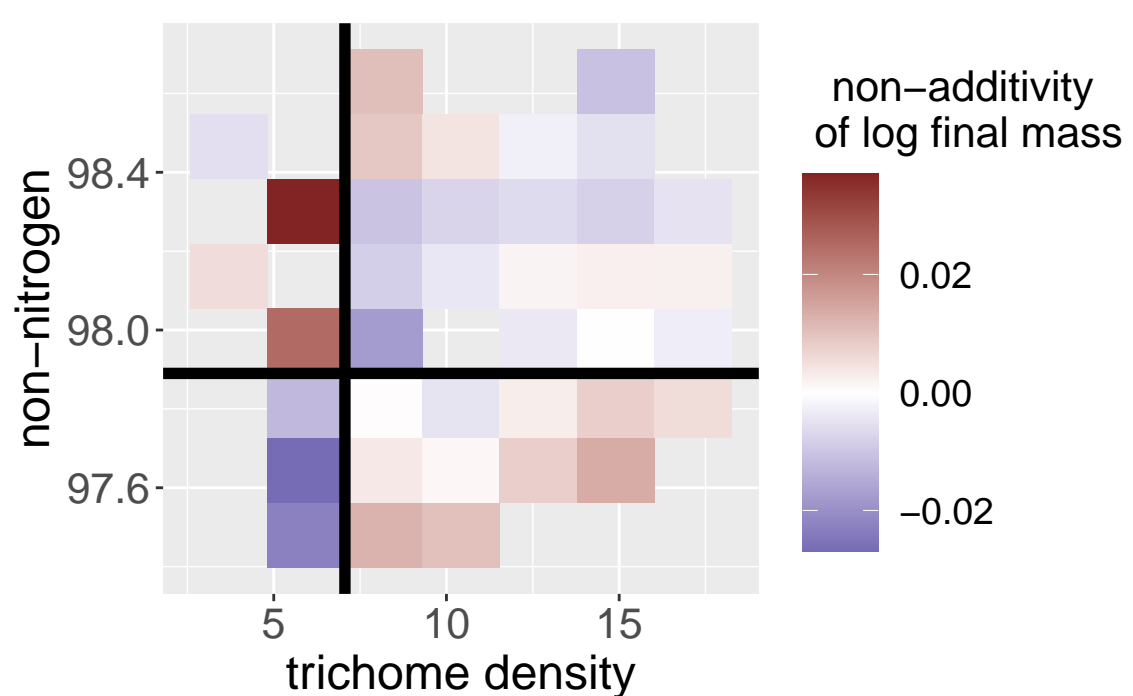**(z)****Random Forest predictions**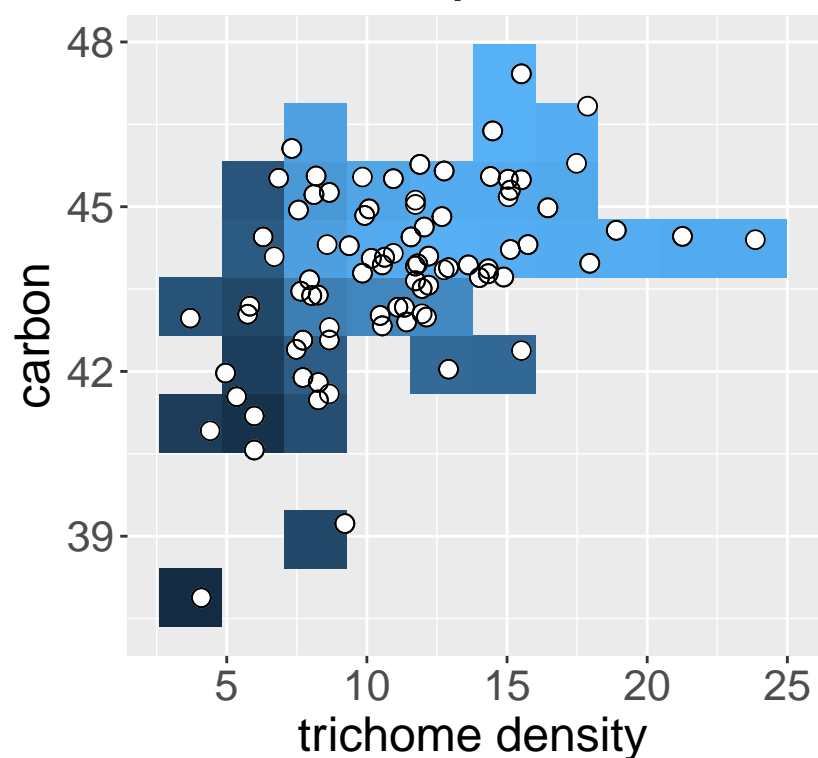**Monarch Growth**

classification : antagonism

 $\theta = 0.778$ , null 95%:  $-0.481$  --  $0.481$ 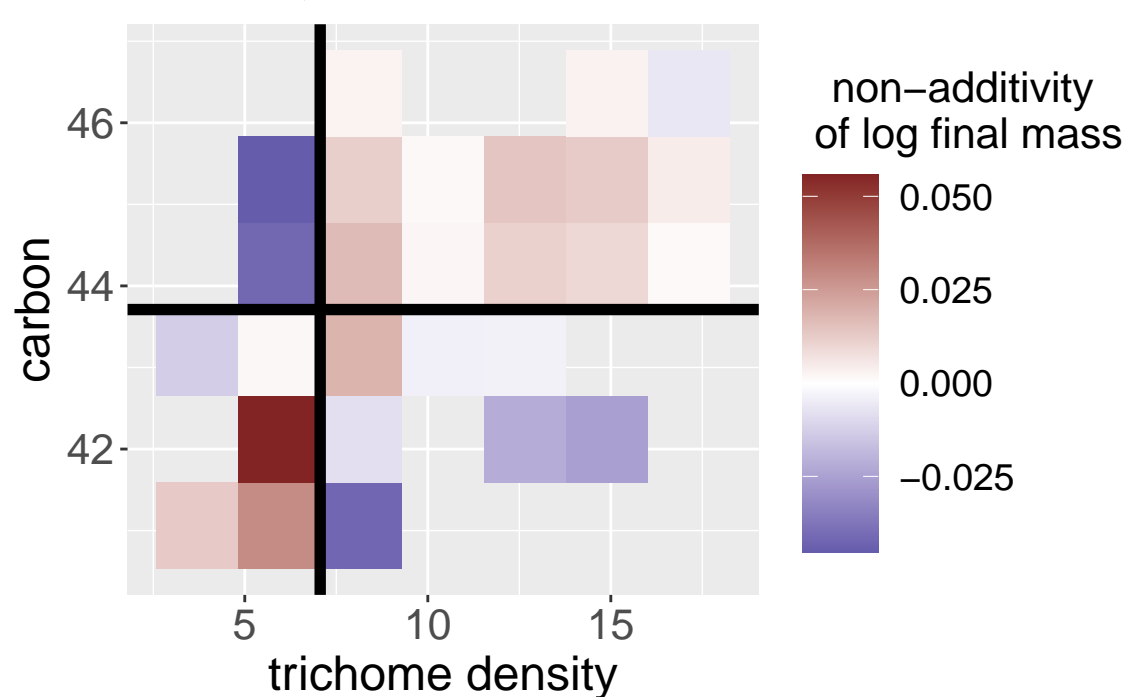**(aa)****Random Forest predictions**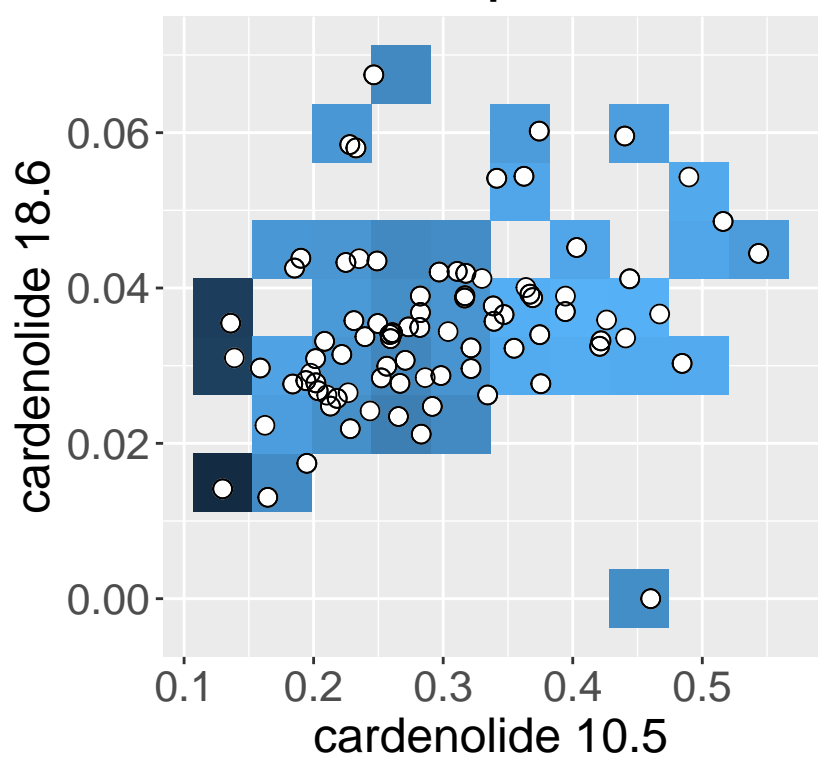**Monarch Growth**

classification : unclear

 $\theta = -0.394$ , null 95%:  $-0.455$  --  $0.515$ 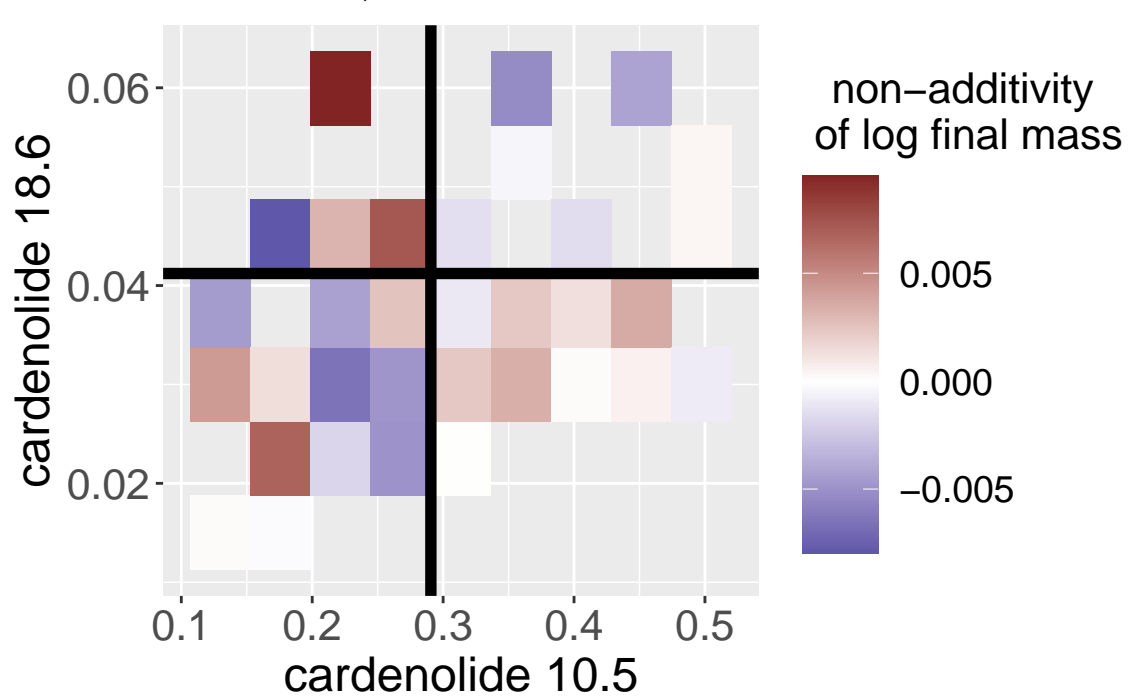

**(ab)**

Monarch Growth

Random Forest predictions

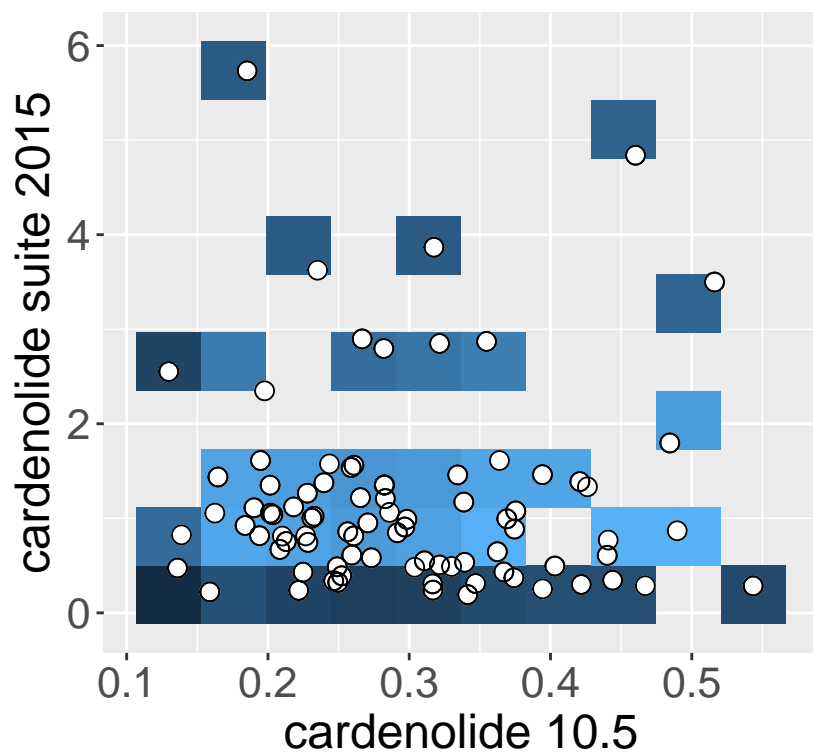

classification : antagonism

 $\theta = 0.714$ , null 95%:  $-0.571$  --  $0.571$ 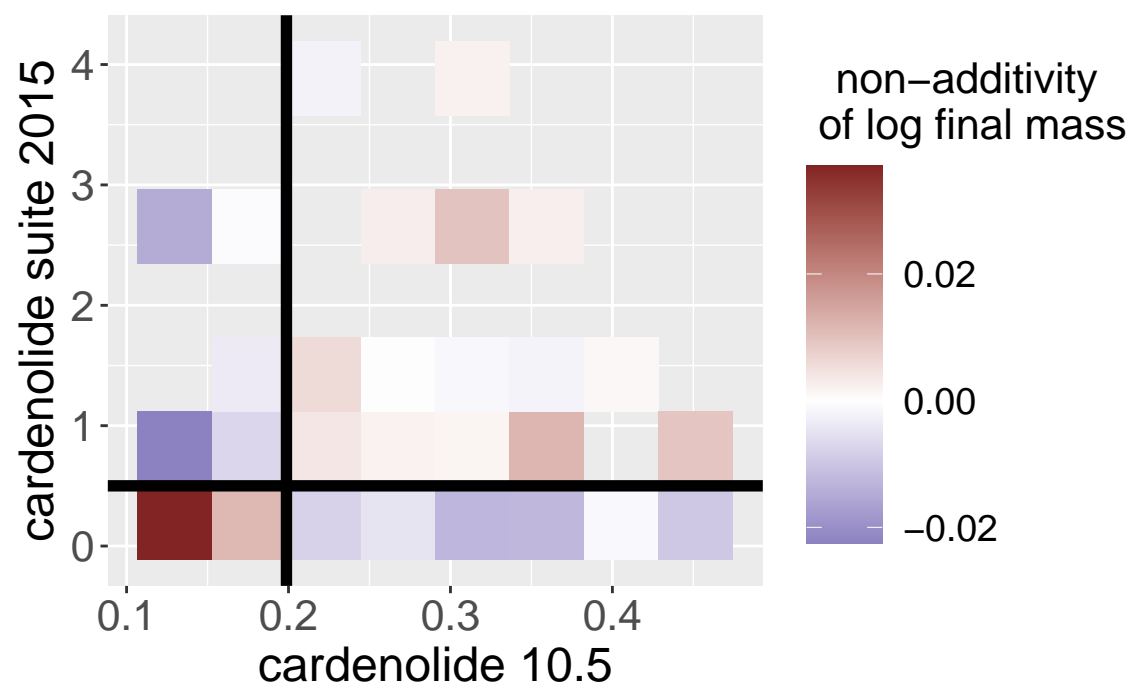**(ac)**

Monarch Growth

Random Forest predictions

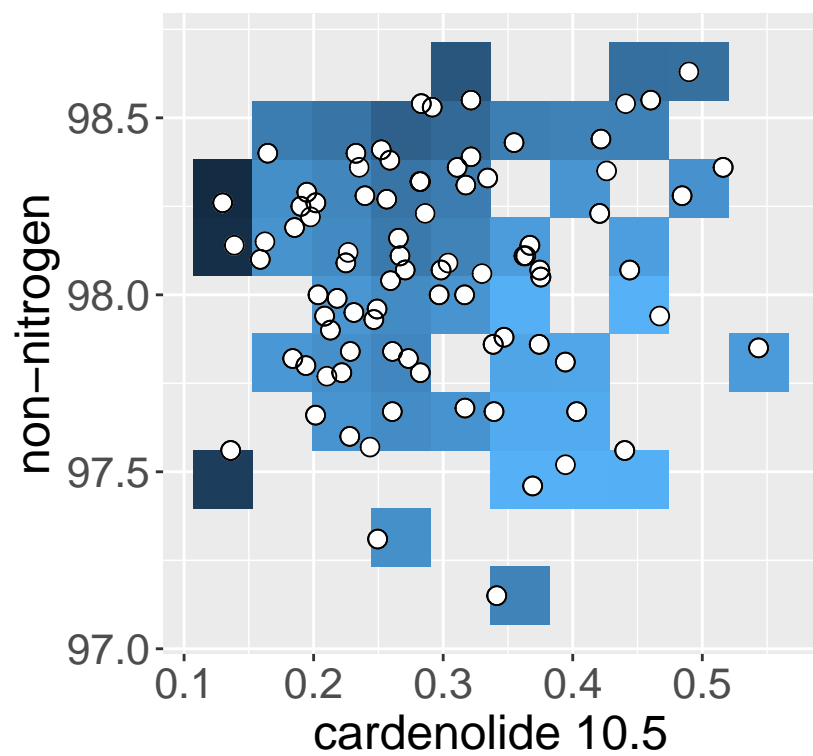

classification : synergy

 $\theta = -0.628$ , null 95%:  $-0.442$  --  $0.442$ 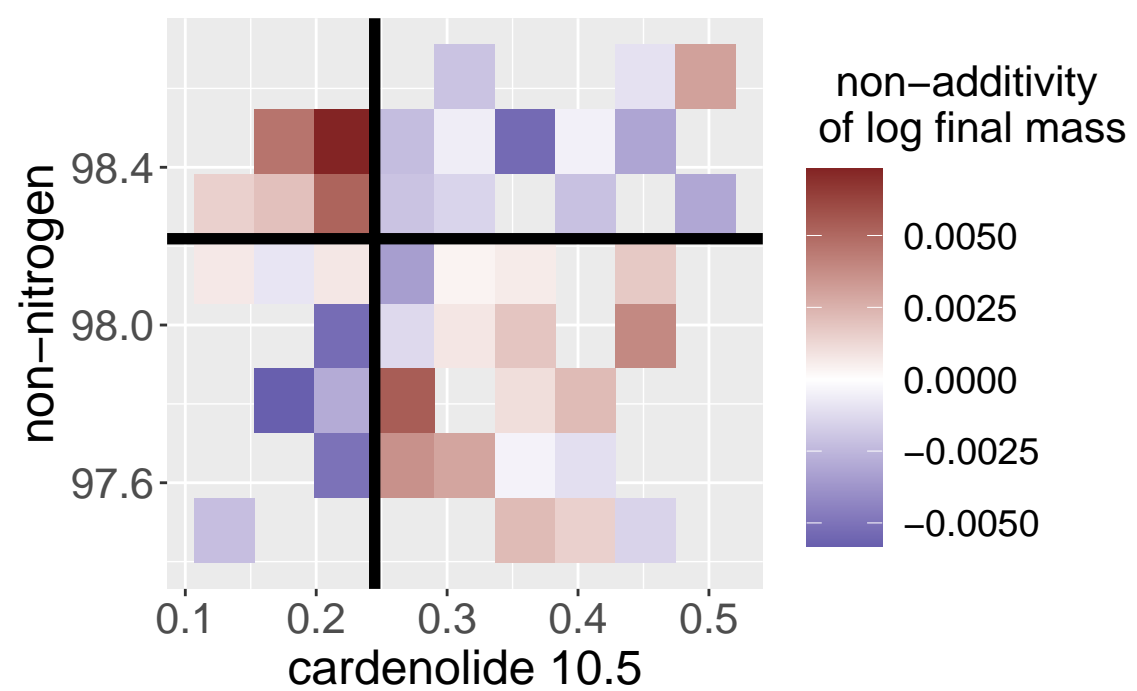**(ad)**

Monarch Growth

Random Forest predictions

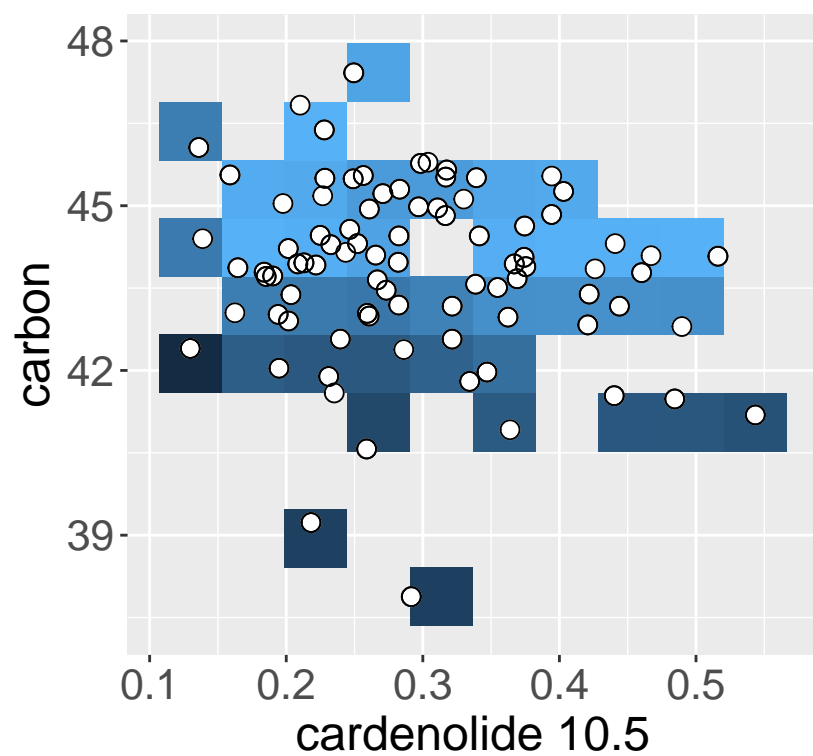

classification : synergy

 $\theta = -0.706$ , null 95%:  $-0.471$  --  $0.471$ 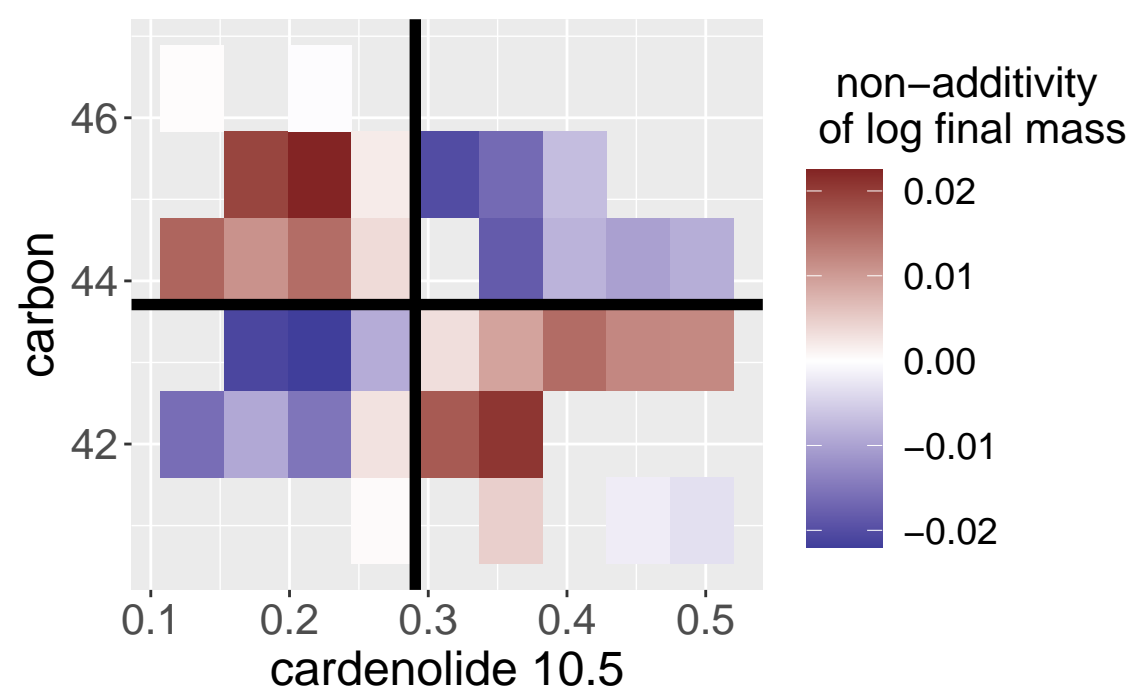

**(ae)****Monarch Growth**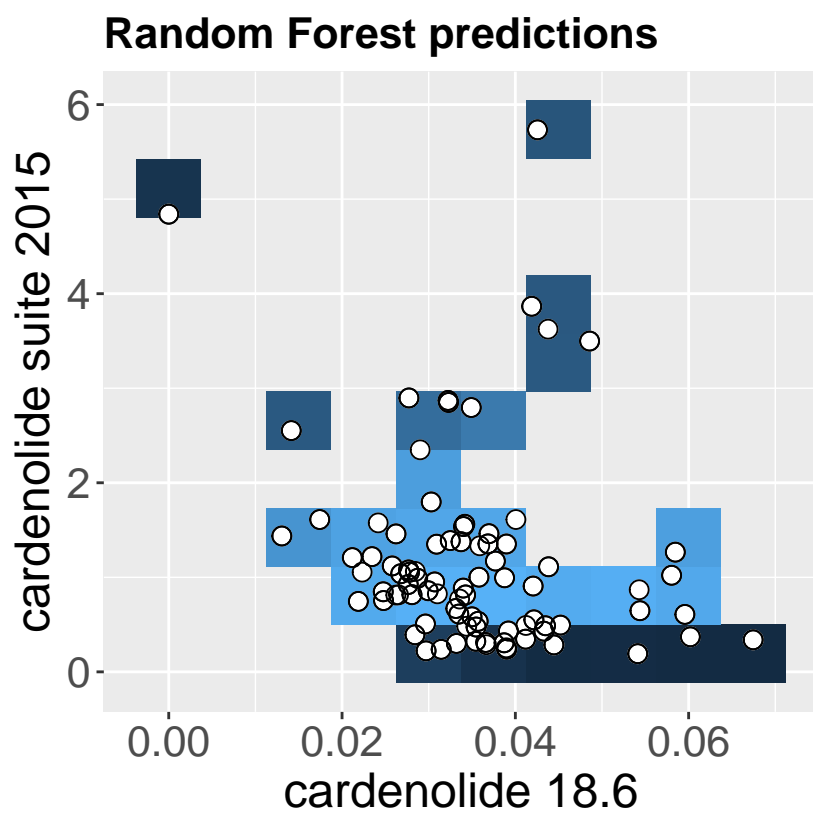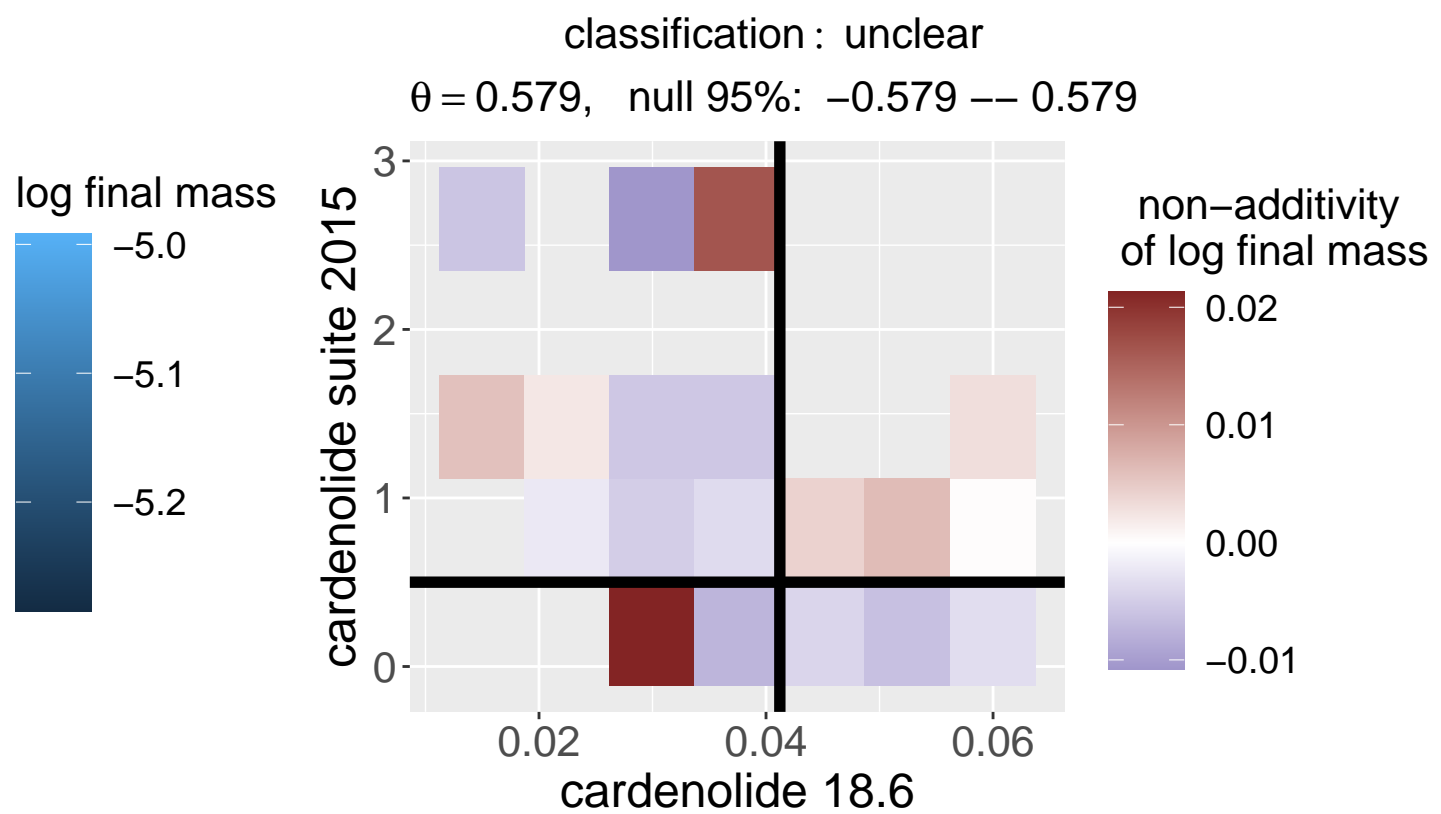**(af)****Monarch Growth**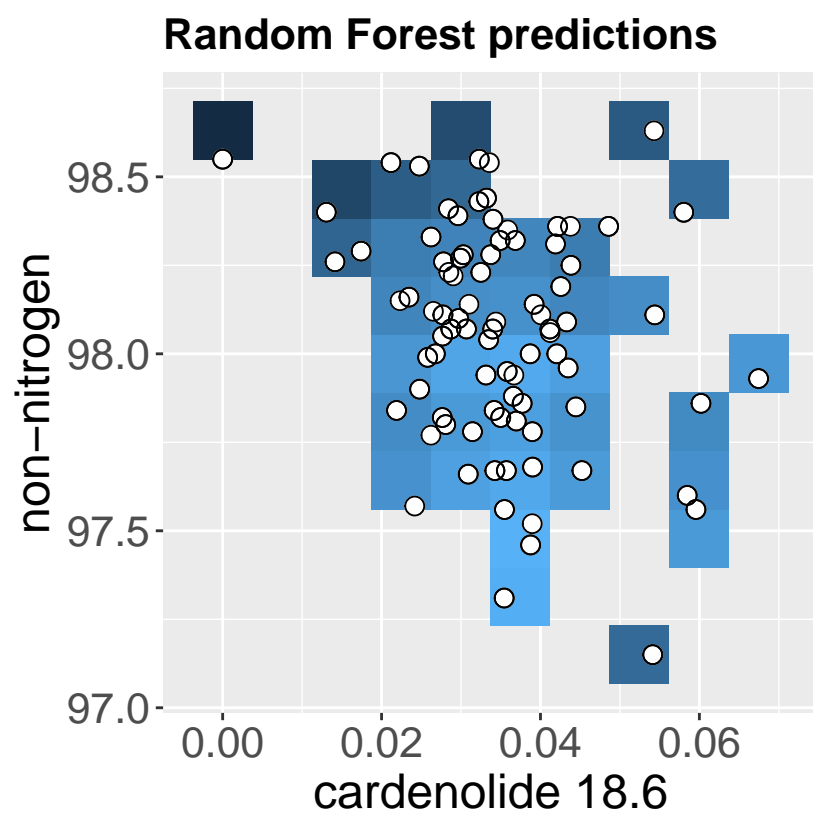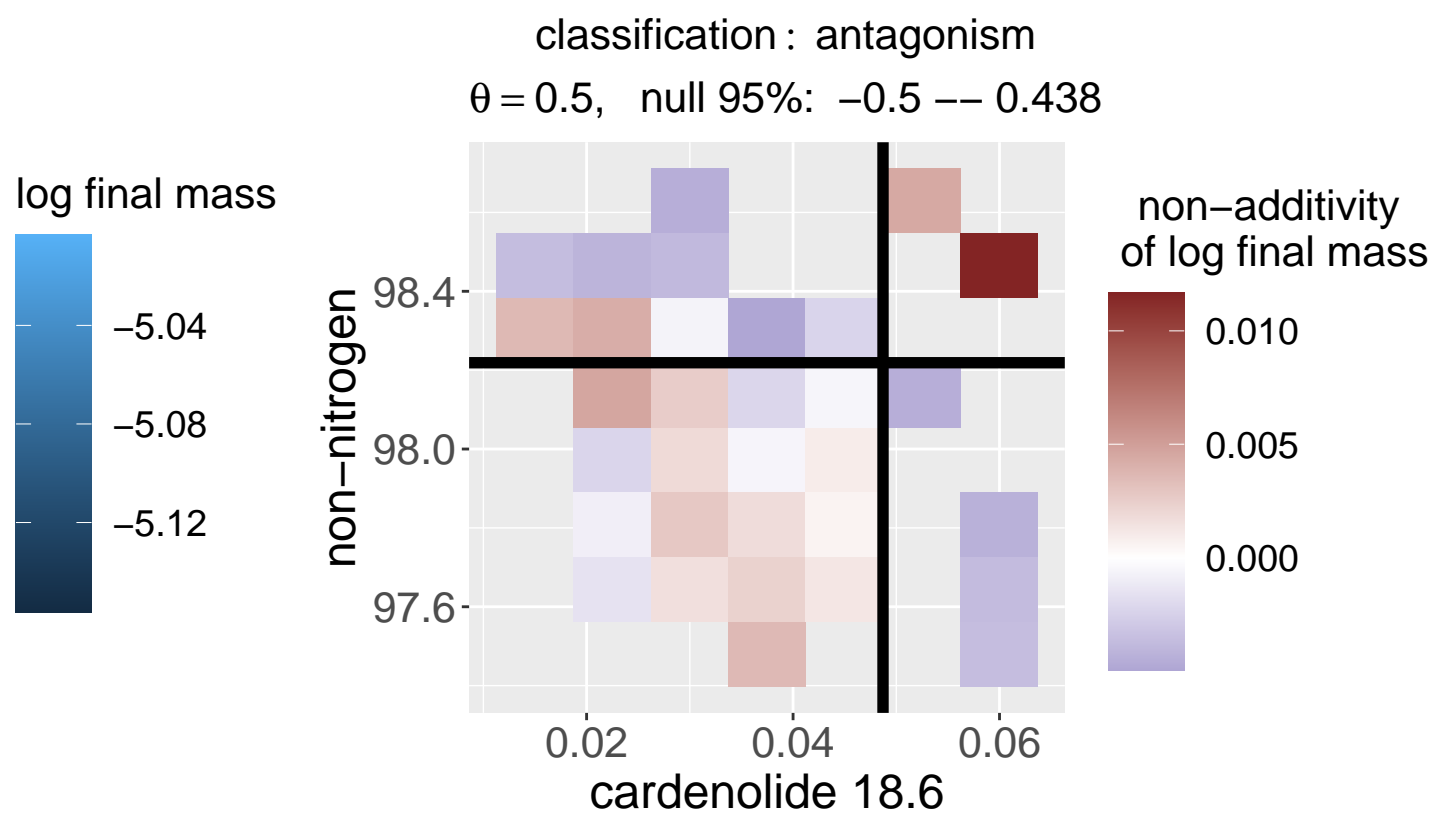**(ag)****Monarch Growth**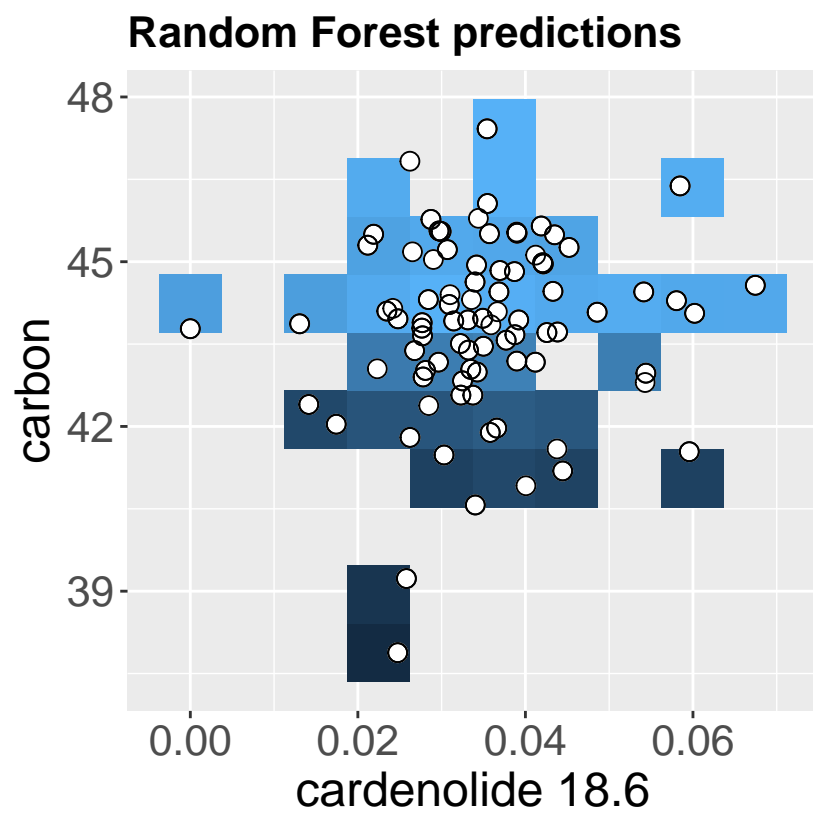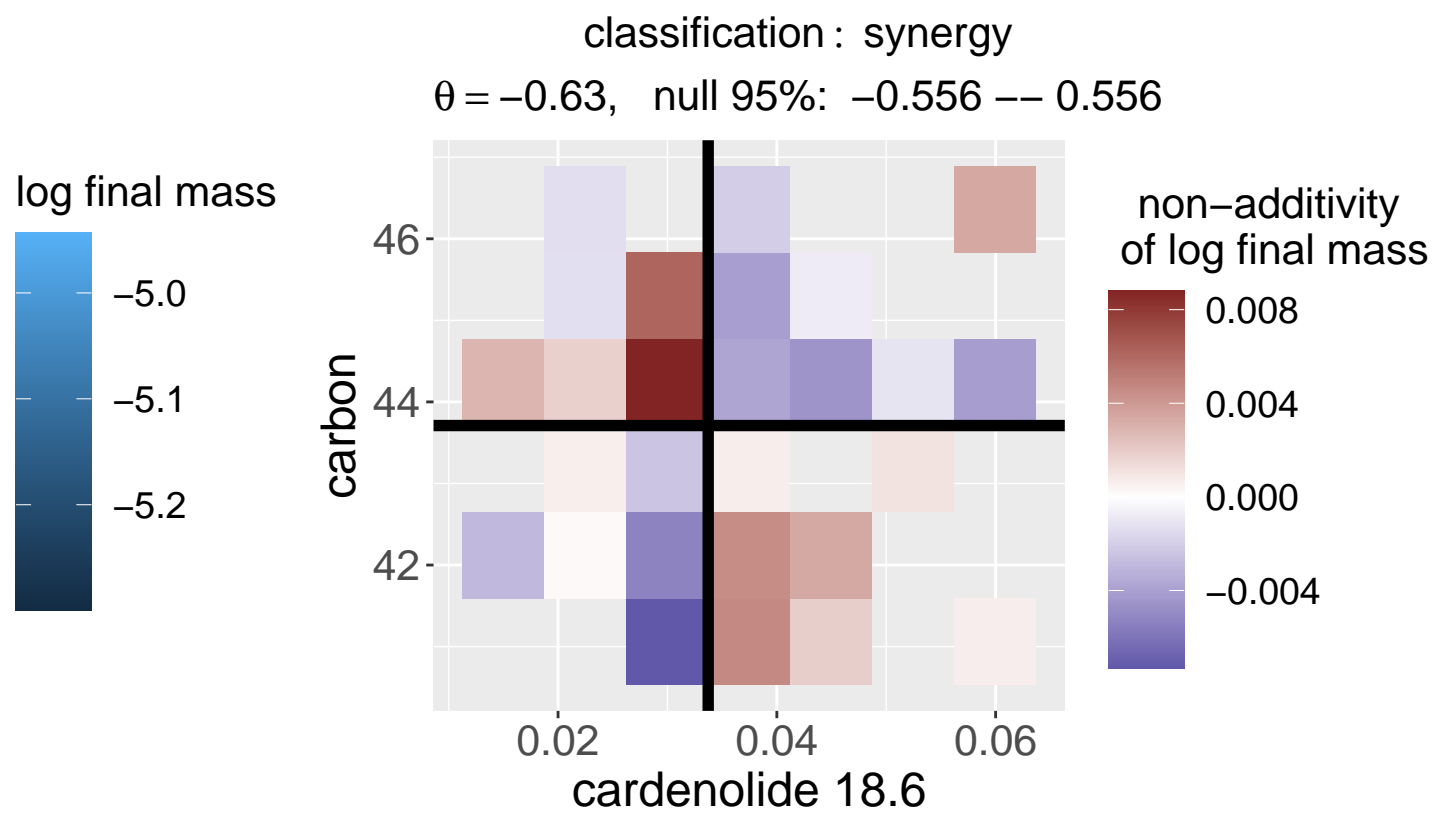

**(ah)**

Monarch Growth

Random Forest predictions

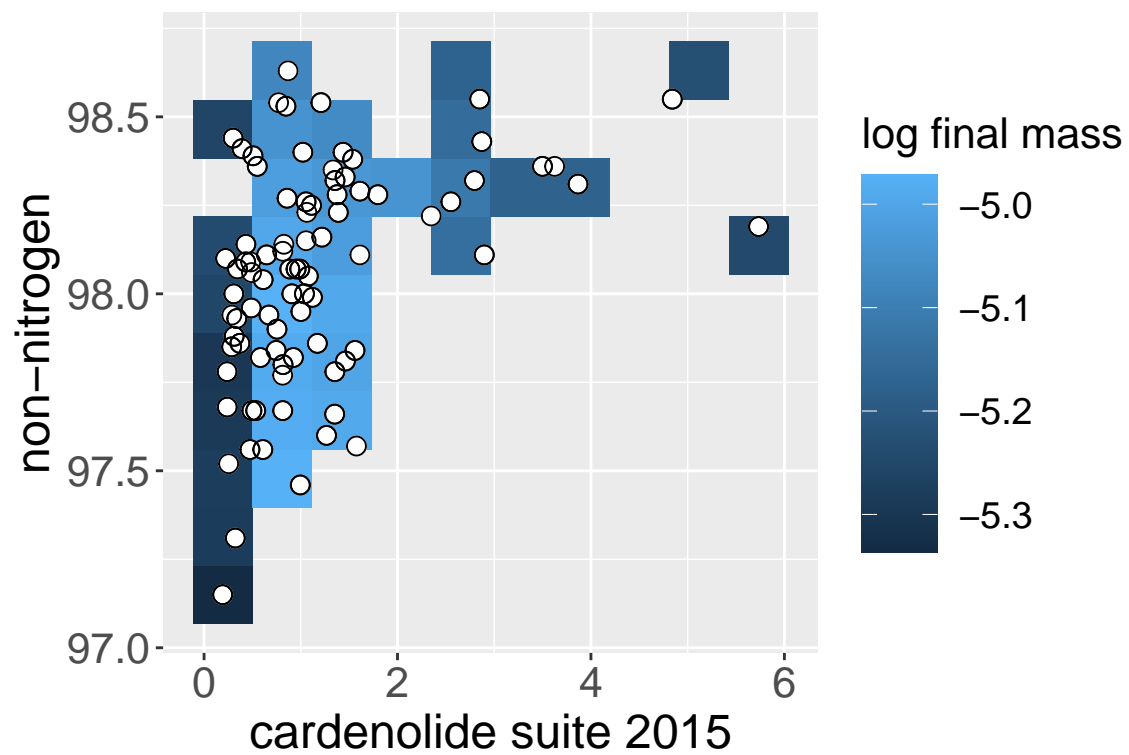

classification : synergy

 $\theta = -0.75$ , null 95%:  $-0.5$  --  $0.583$ 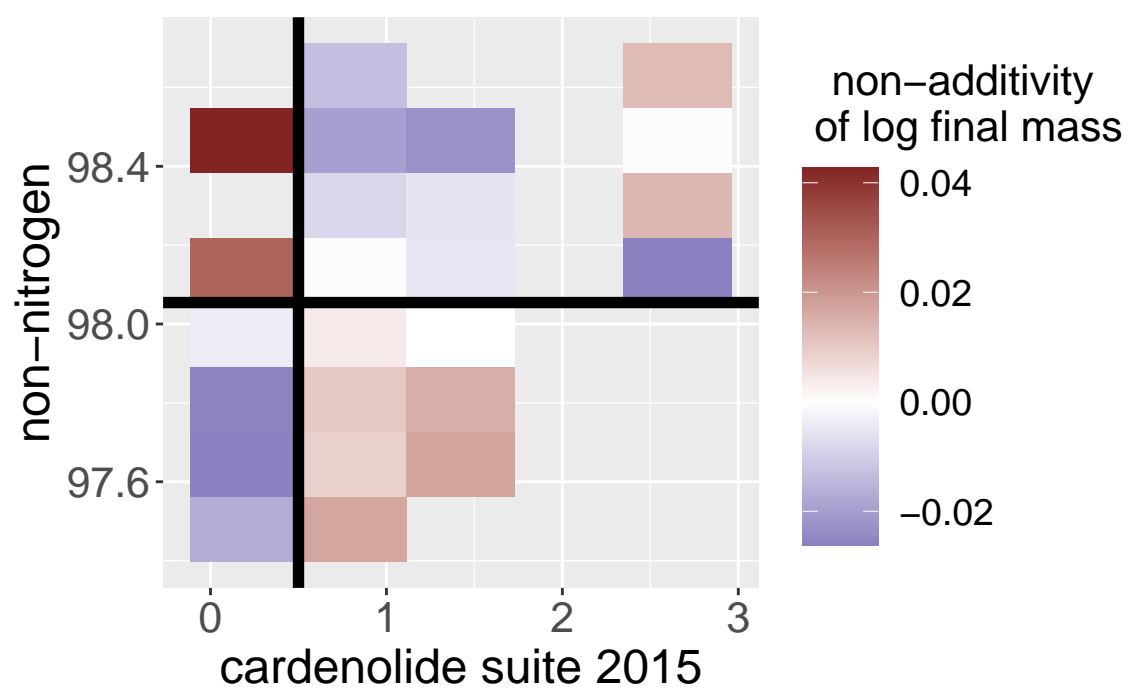**(ai)**

Monarch Growth

Random Forest predictions

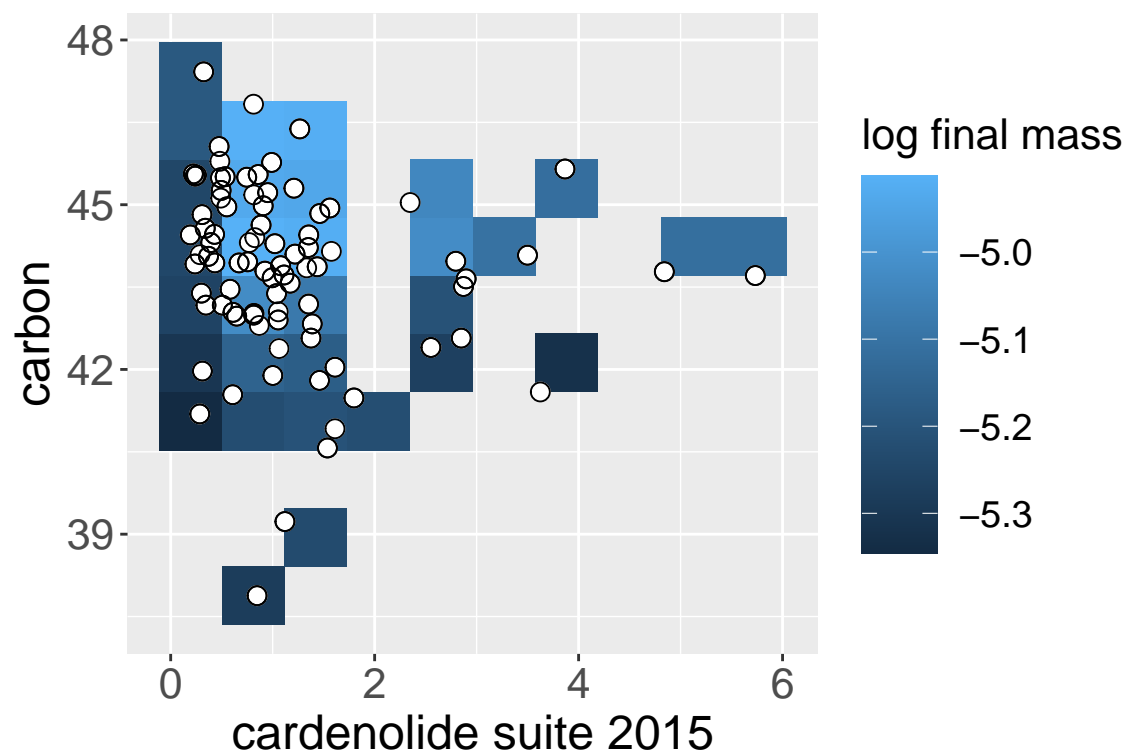

classification : antagonism

 $\theta = 0.917$ , null 95%:  $-0.583$  --  $0.583$ 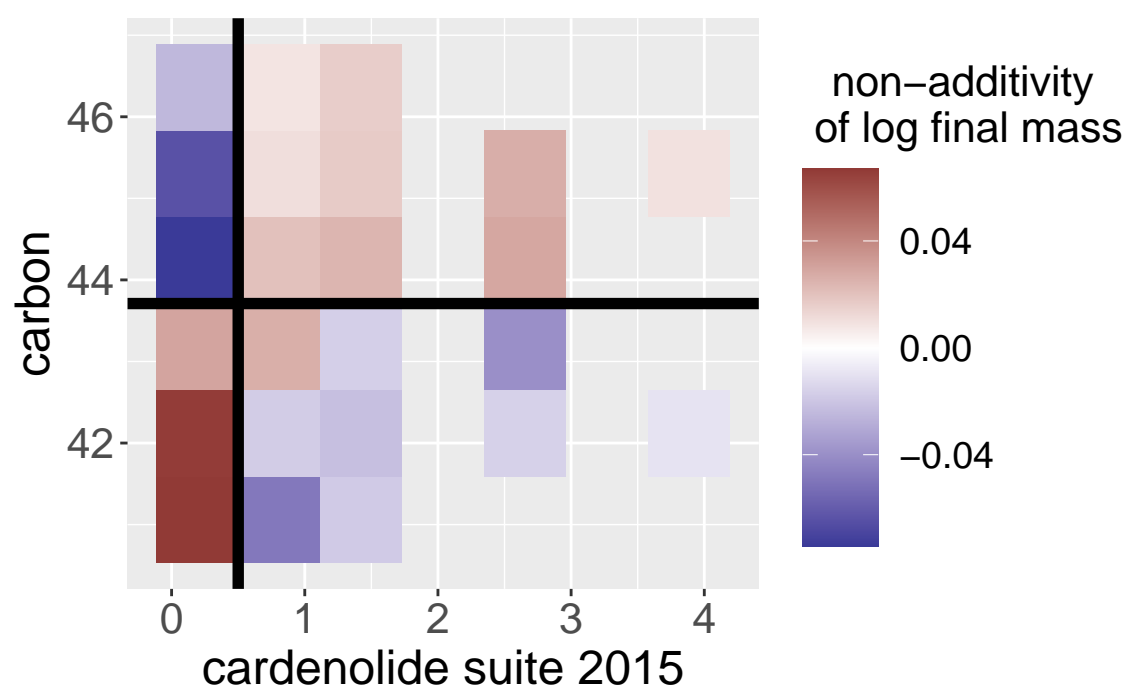**(aj)**

Monarch Growth

Random Forest predictions

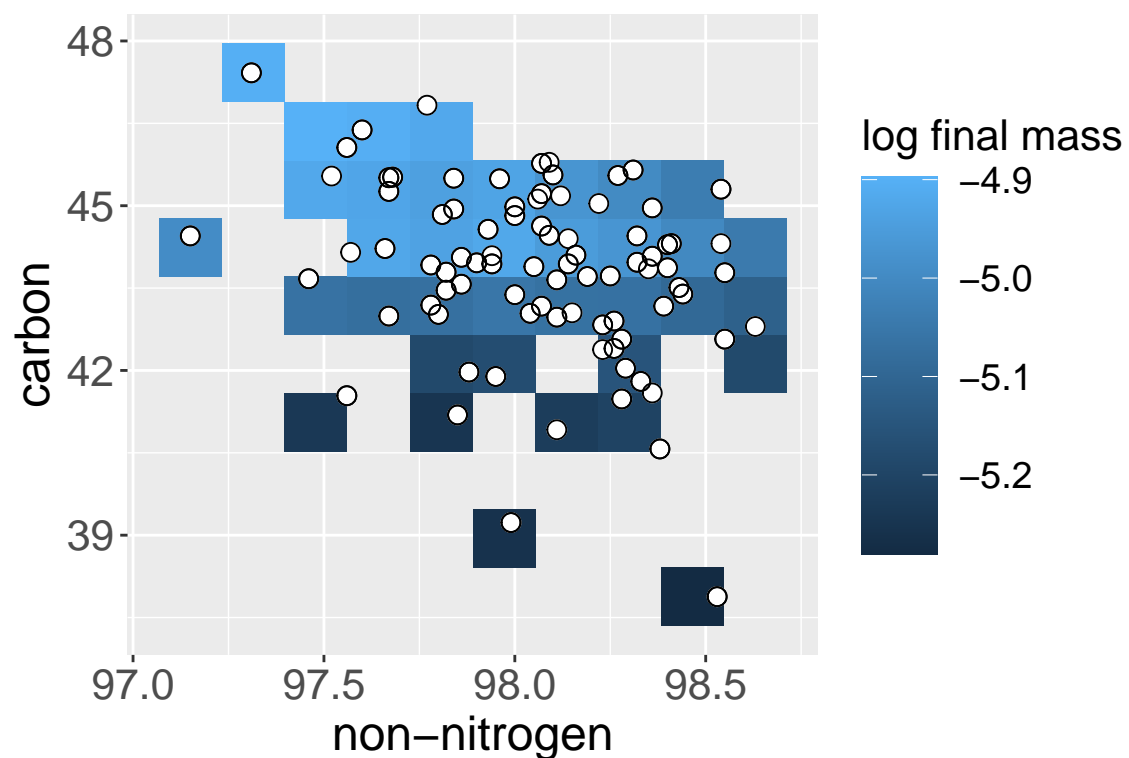

classification : synergy

 $\theta = -0.758$ , null 95%:  $-0.455$  --  $0.455$ 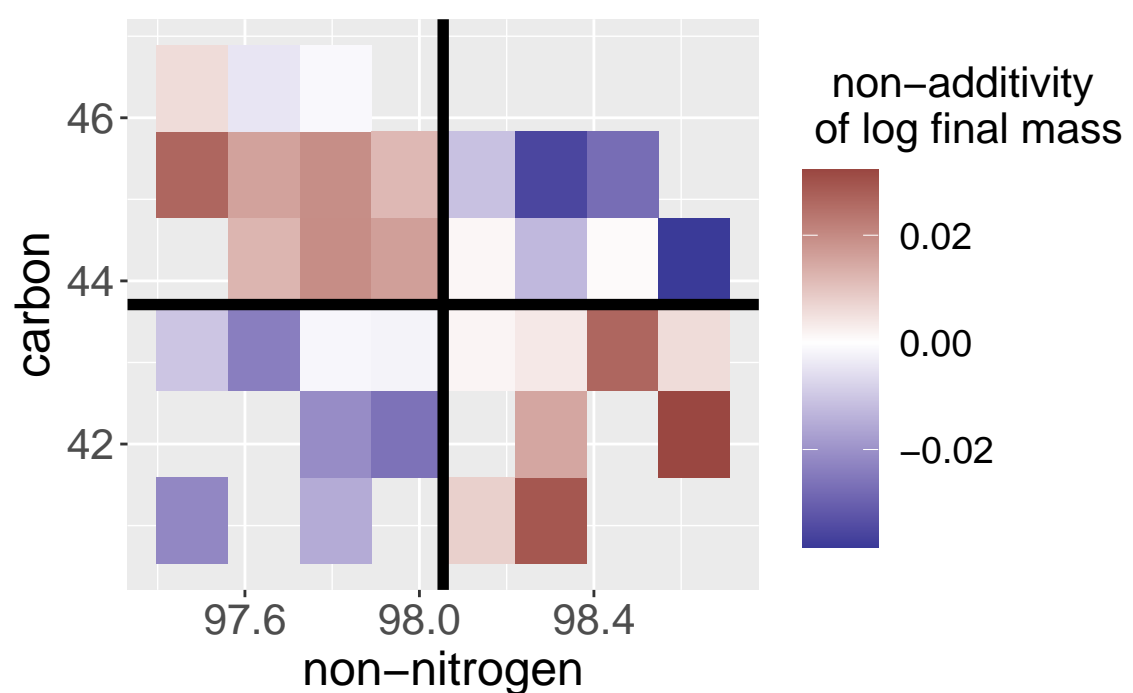

**(ak)**

Monarch Survival

Random Forest predictions

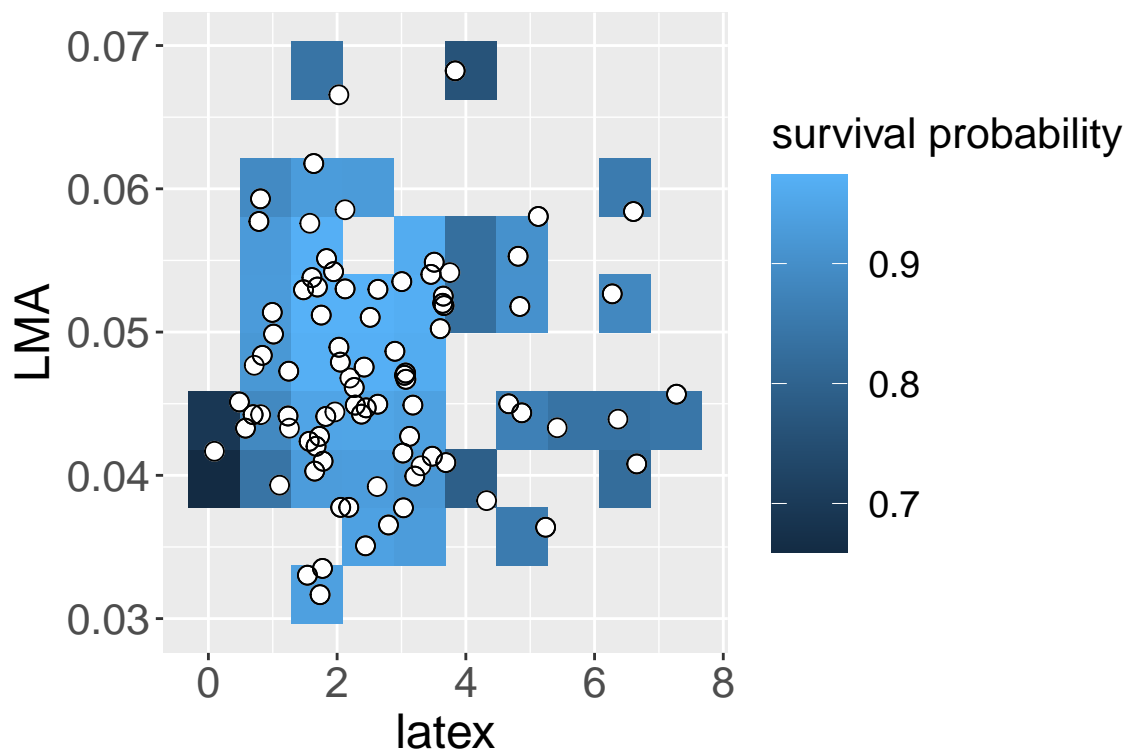

classification : unclear

 $\theta = 0.436$ , null 95%:  $-0.438$  --  $0.436$ 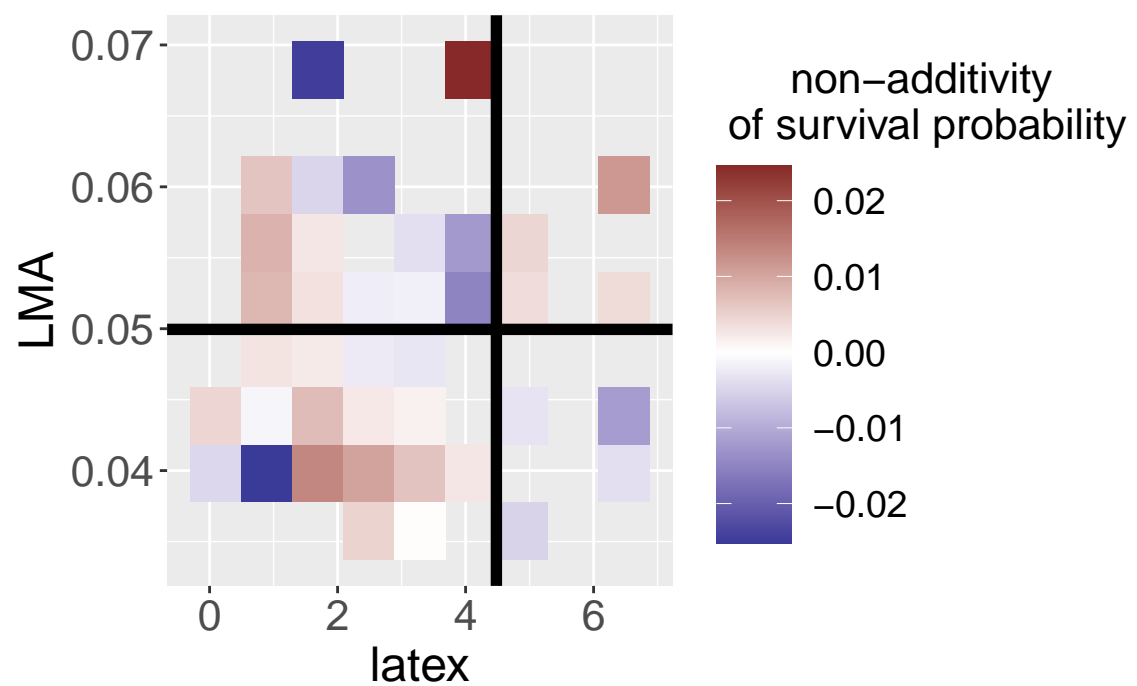**(al)**

Monarch Survival

Random Forest predictions

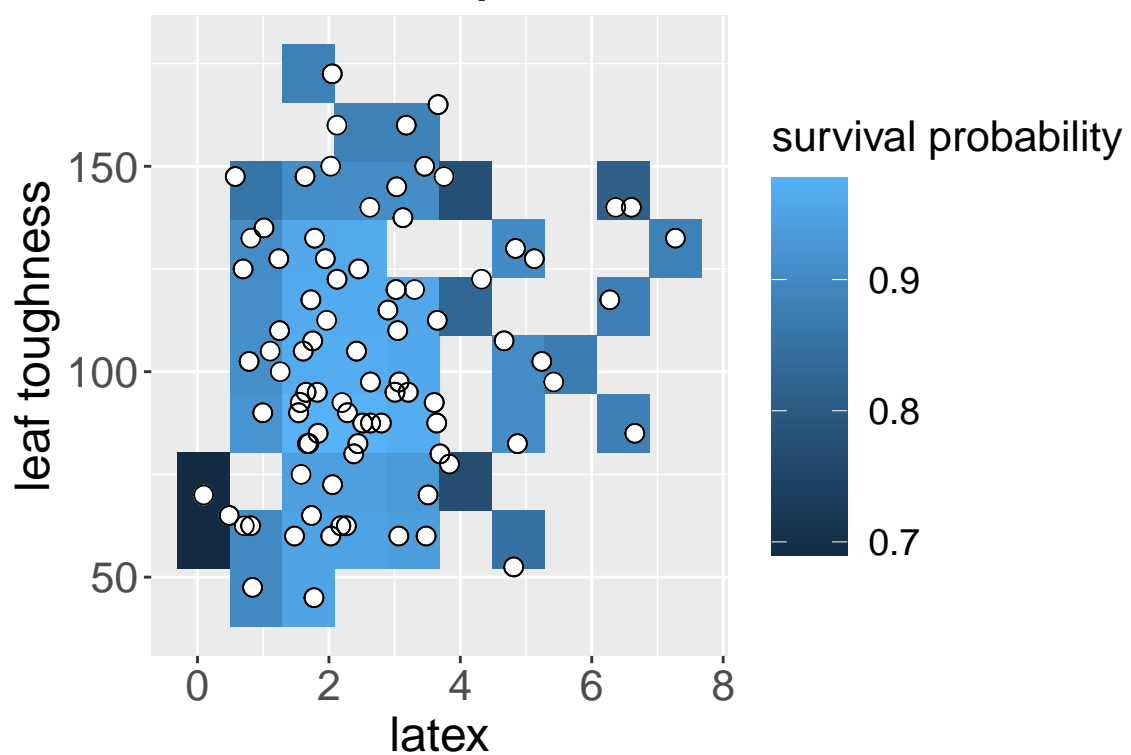

classification : antagonism

 $\theta = 0.571$ , null 95%:  $-0.429$  --  $0.429$ 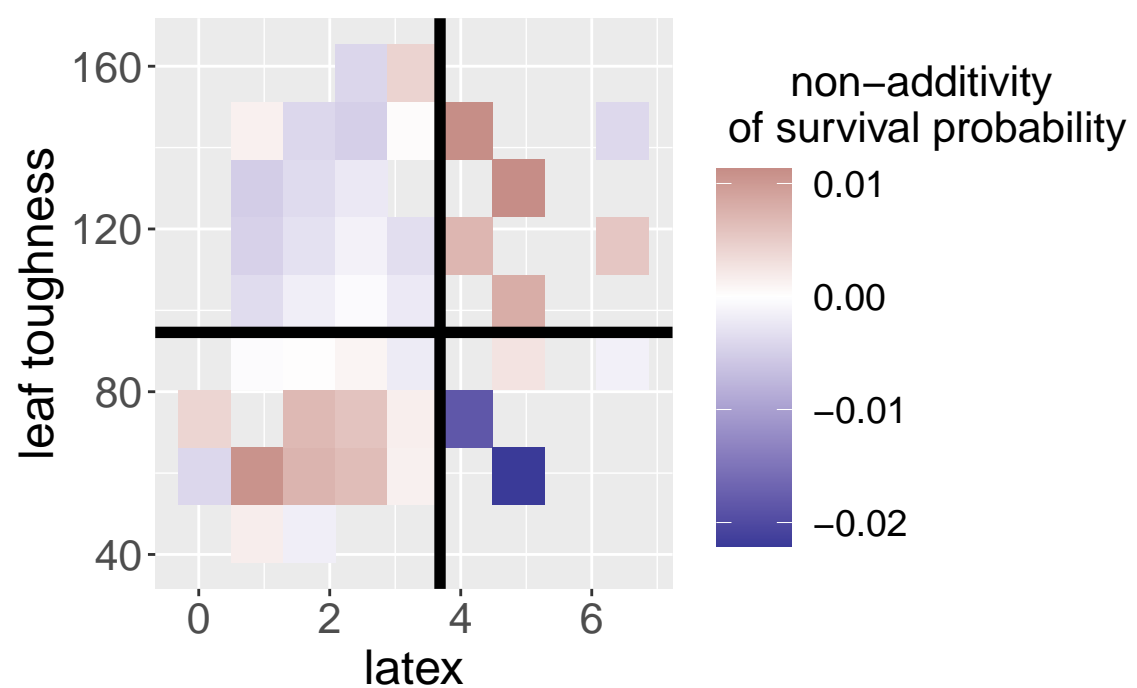**(am)**

Monarch Survival

Random Forest predictions

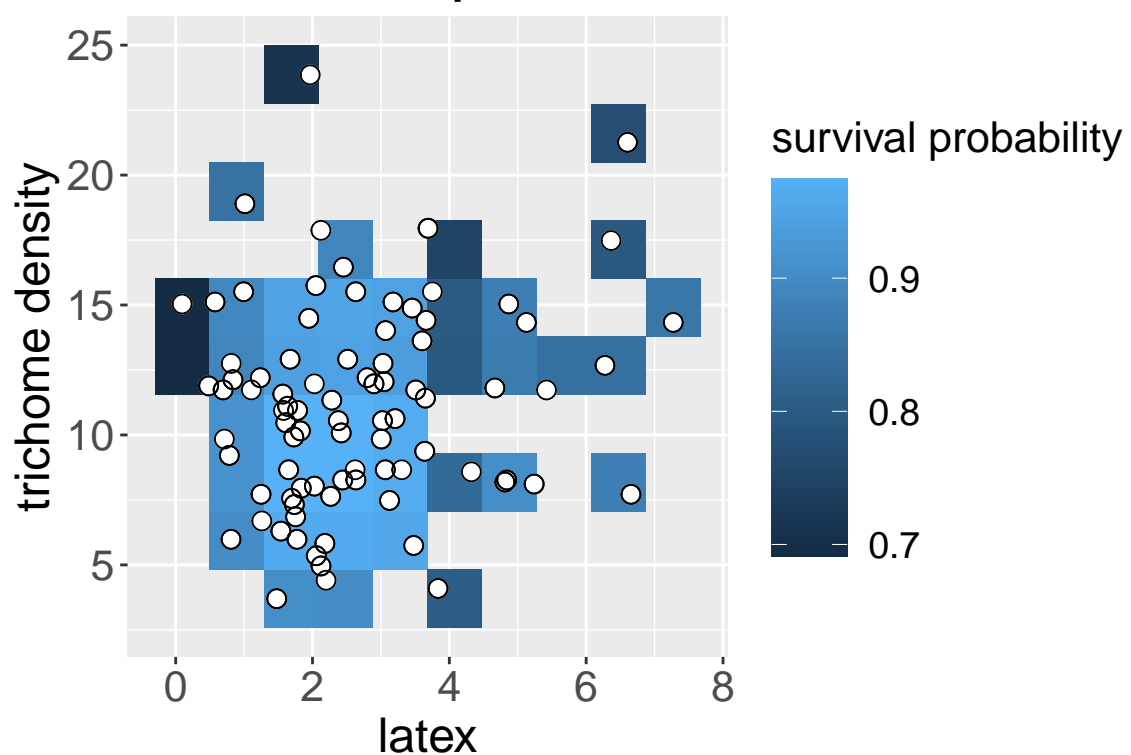

classification : synergy

 $\theta = -0.556$ , null 95%:  $-0.444$  --  $0.444$ 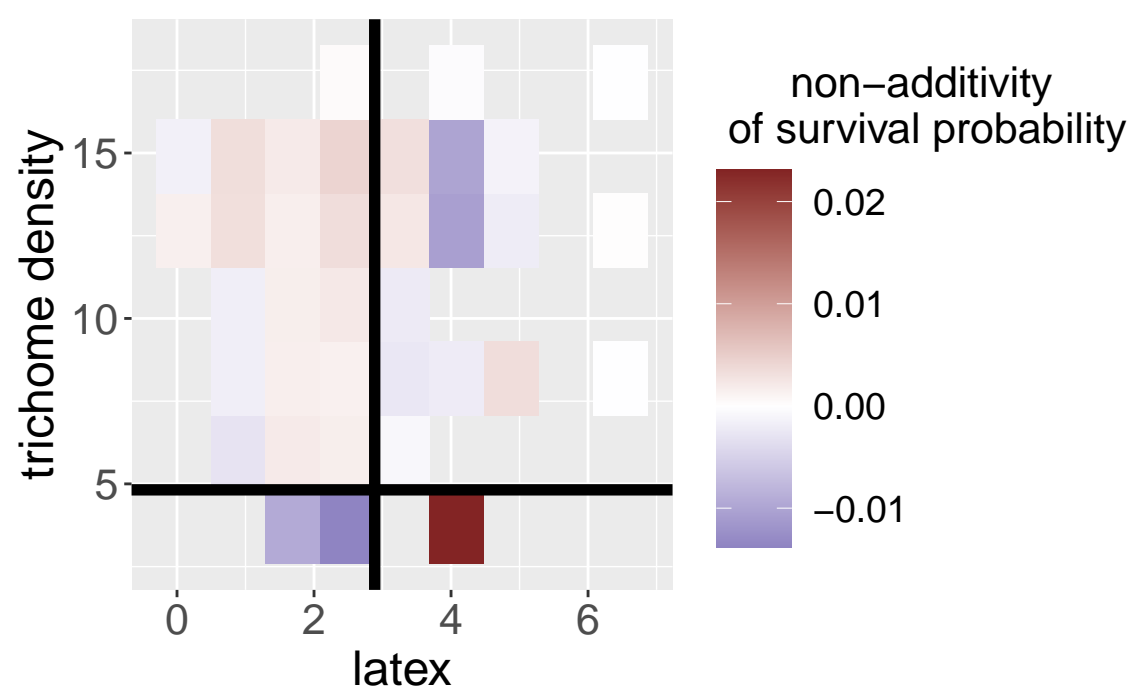

**(an)****Monarch Survival****Random Forest predictions**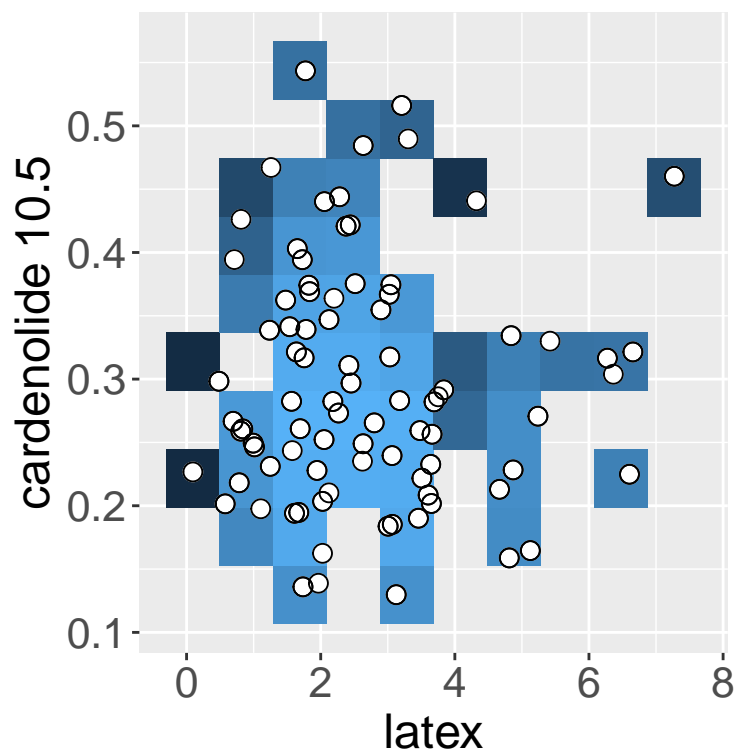

classification : unclear

 $\theta = -0.436$ , null 95%:  $-0.436$  --  $0.436$ 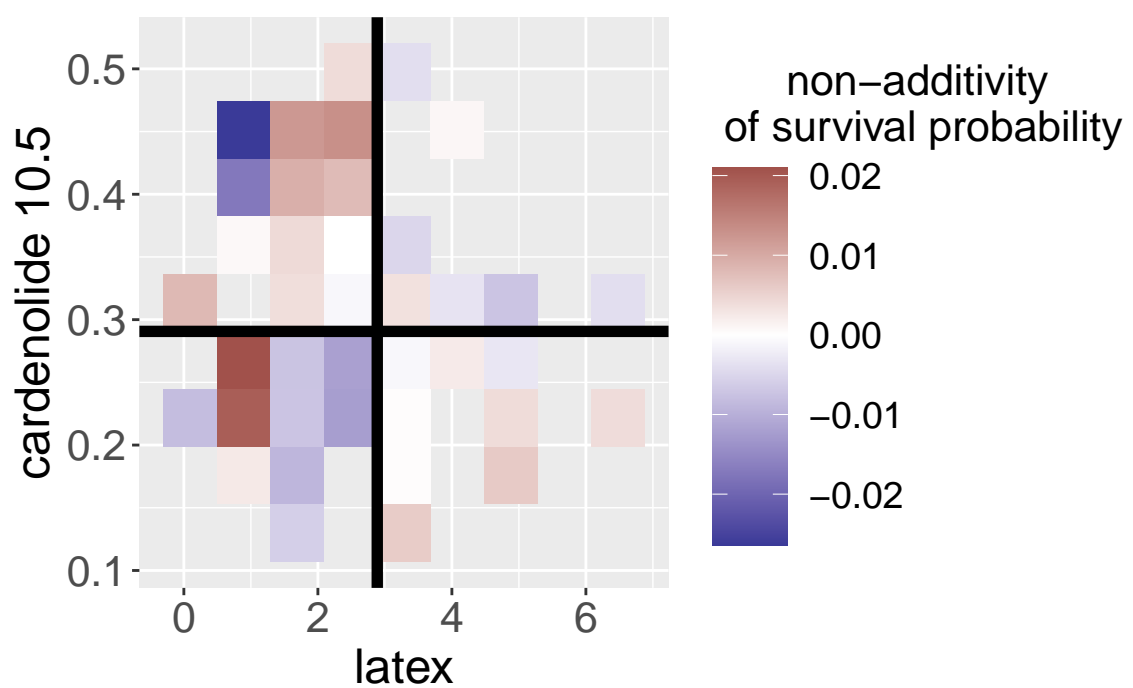**(ao)****Monarch Survival****Random Forest predictions**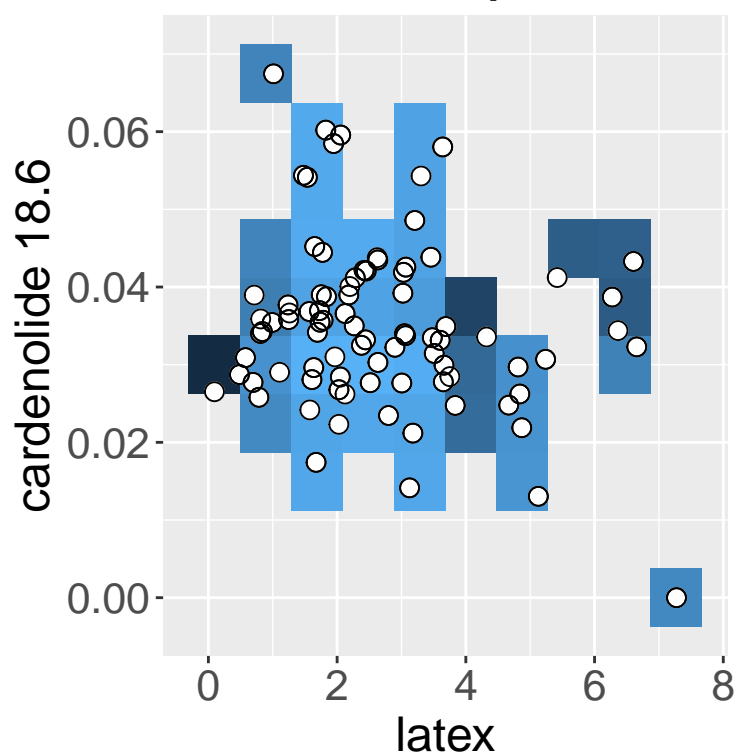

classification : synergy

 $\theta = -0.742$ , null 95%:  $-0.484$  --  $0.484$ 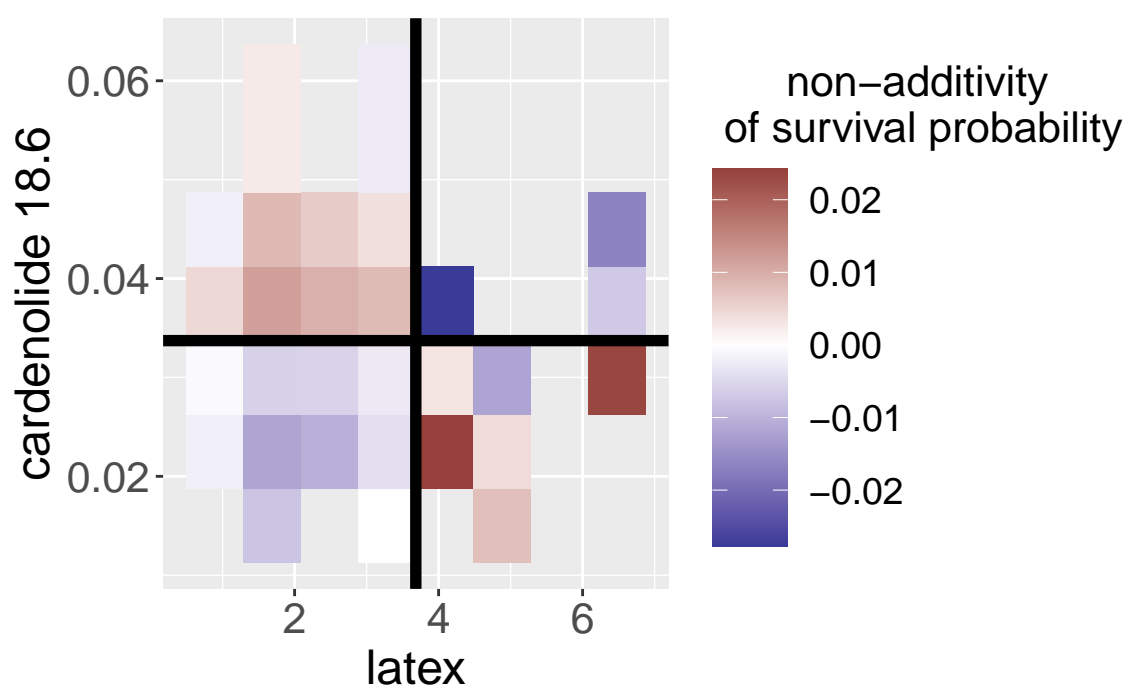**(ap)****Monarch Survival****Random Forest predictions**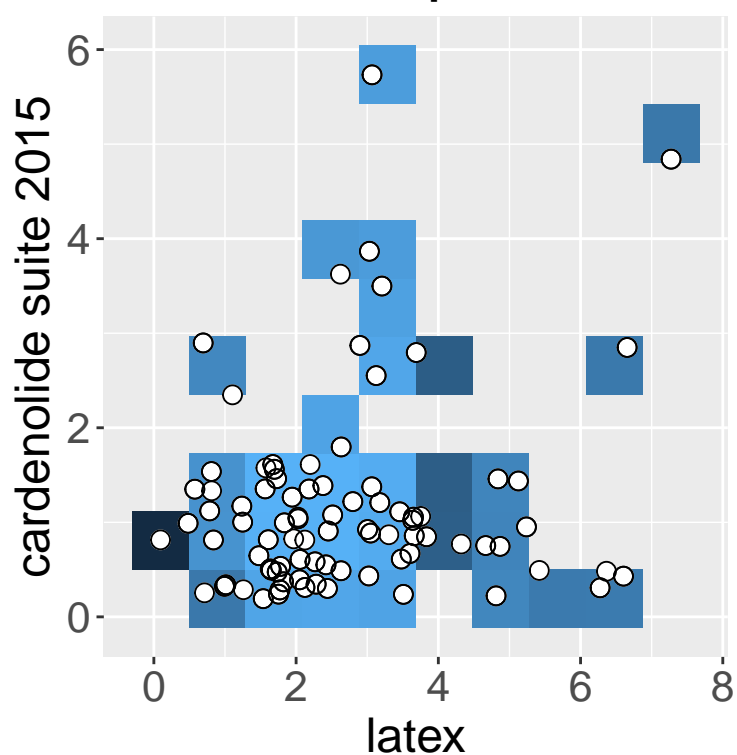

classification : synergy

 $\theta = -0.667$ , null 95%:  $-0.583$  --  $0.583$ 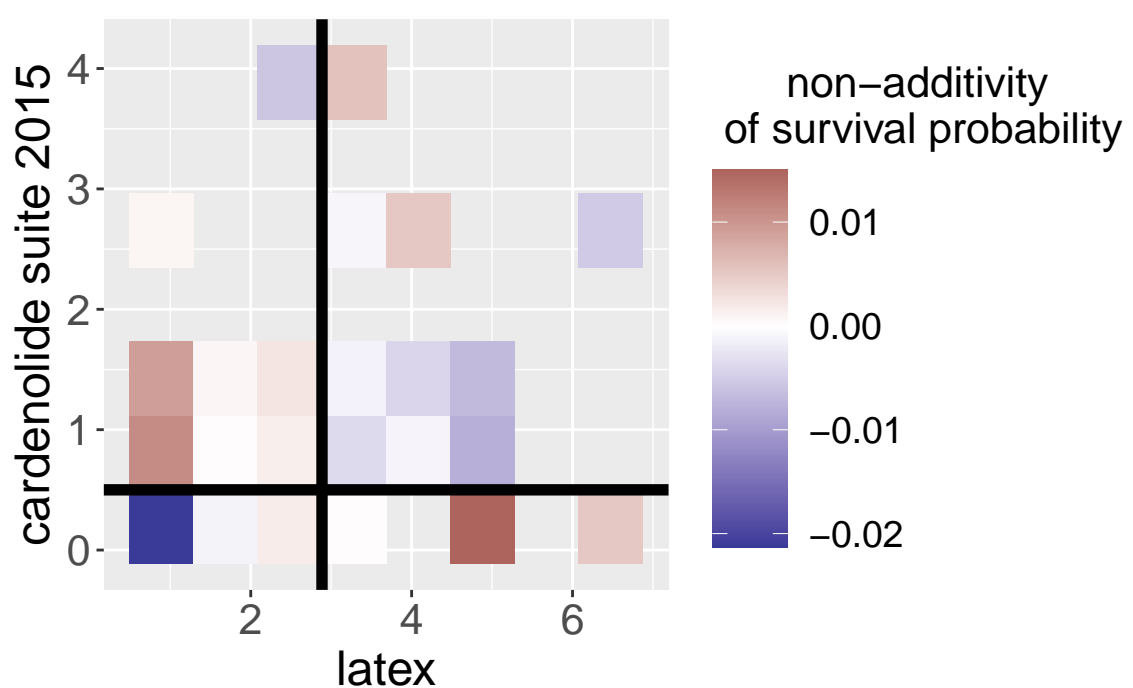

**(aq)****Random Forest predictions**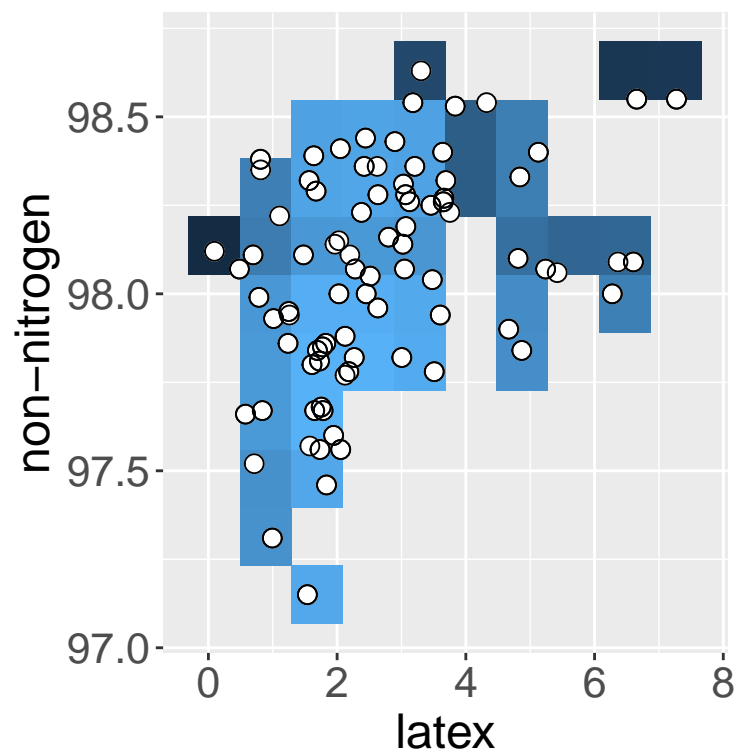**Monarch Survival**

classification : unclear

 $\theta = 0.294$ , null 95%:  $-0.412$  --  $0.471$ 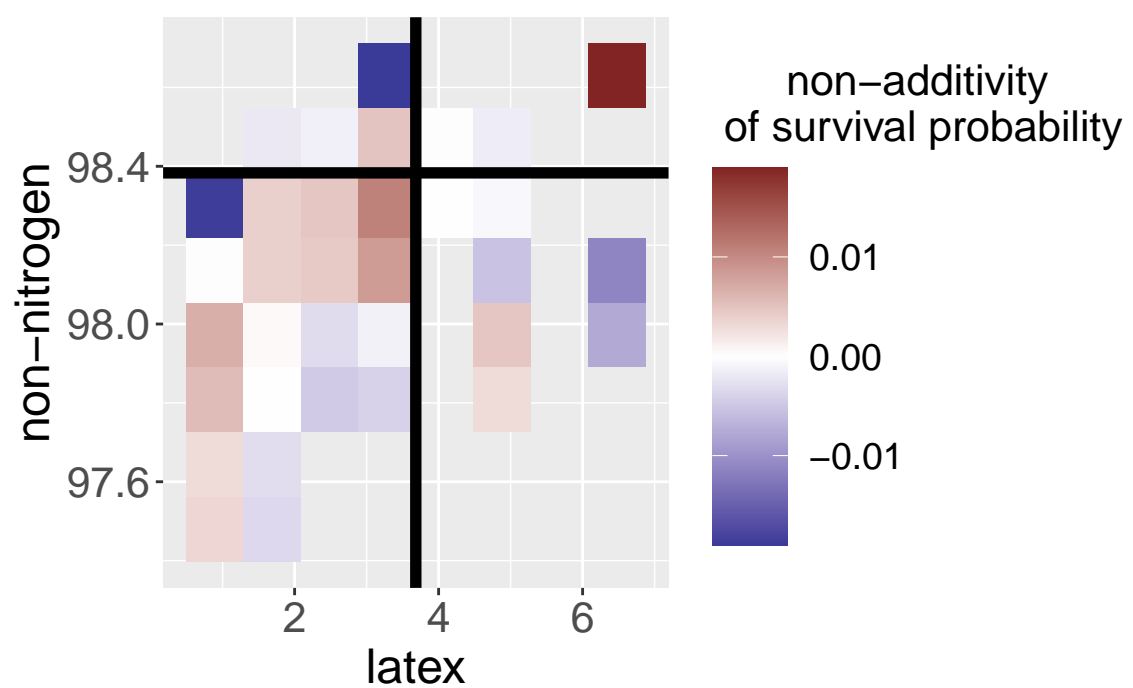**(ar)****Random Forest predictions**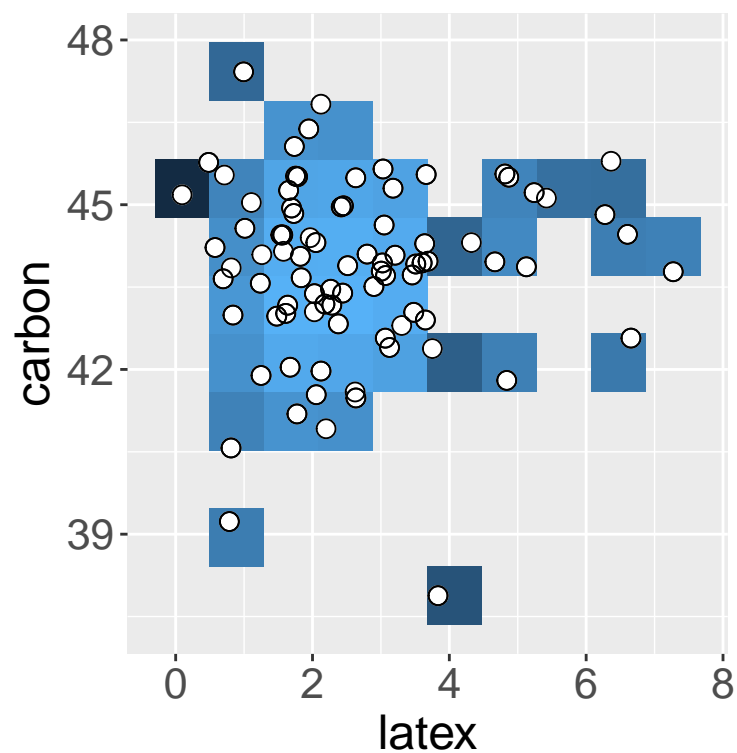**Monarch Survival**

classification : unclear

 $\theta = 0.517$ , null 95%:  $-0.517$  --  $0.517$ 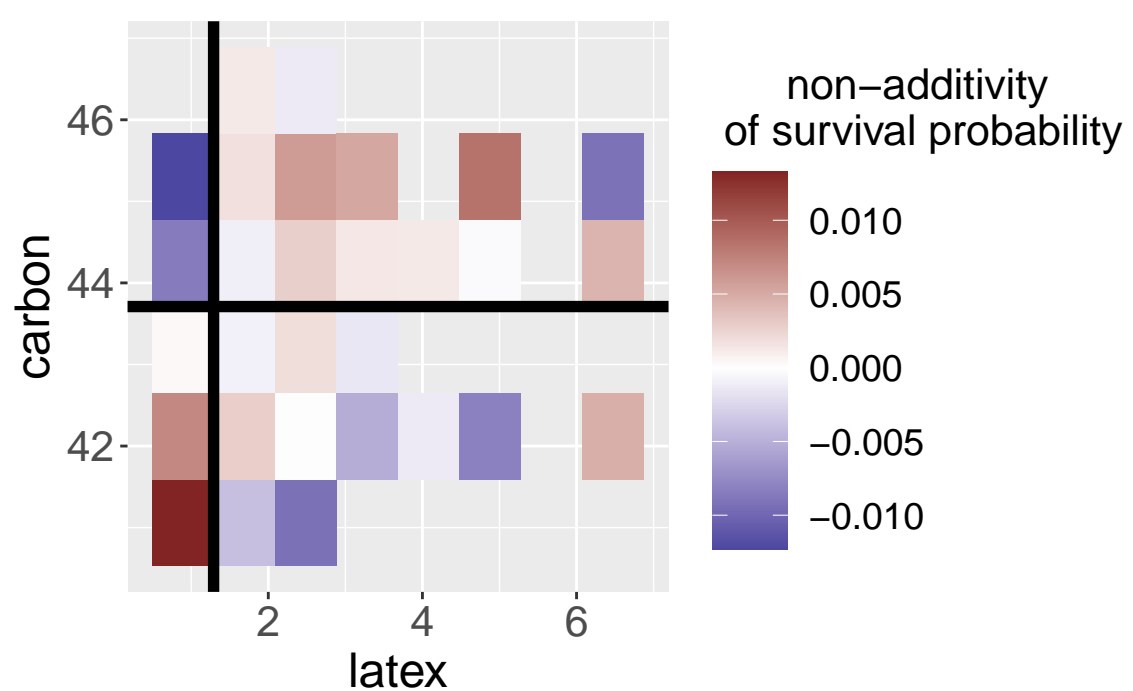**(as)****Random Forest predictions**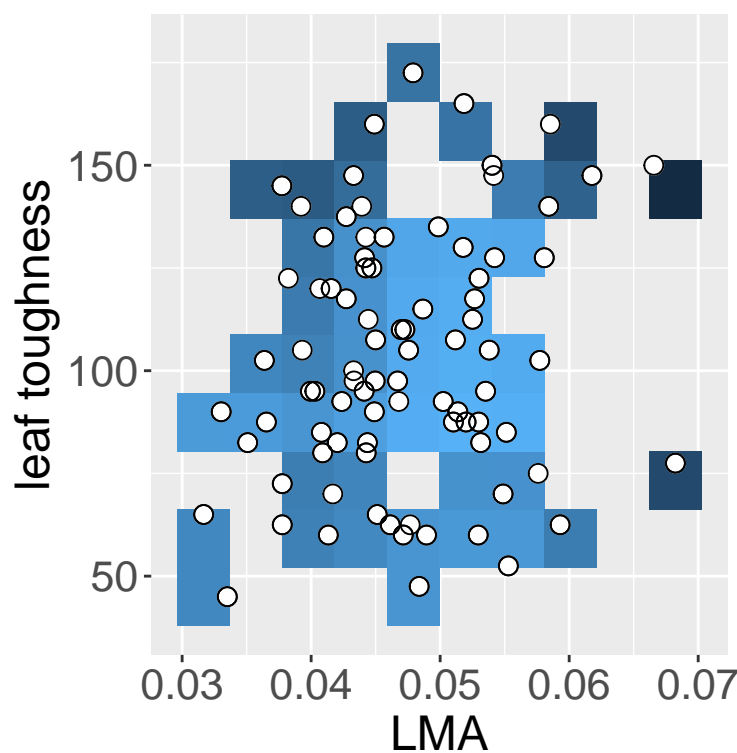**Monarch Survival**

classification : antagonism

 $\theta = 0.689$ , null 95%:  $-0.422$  --  $0.422$ 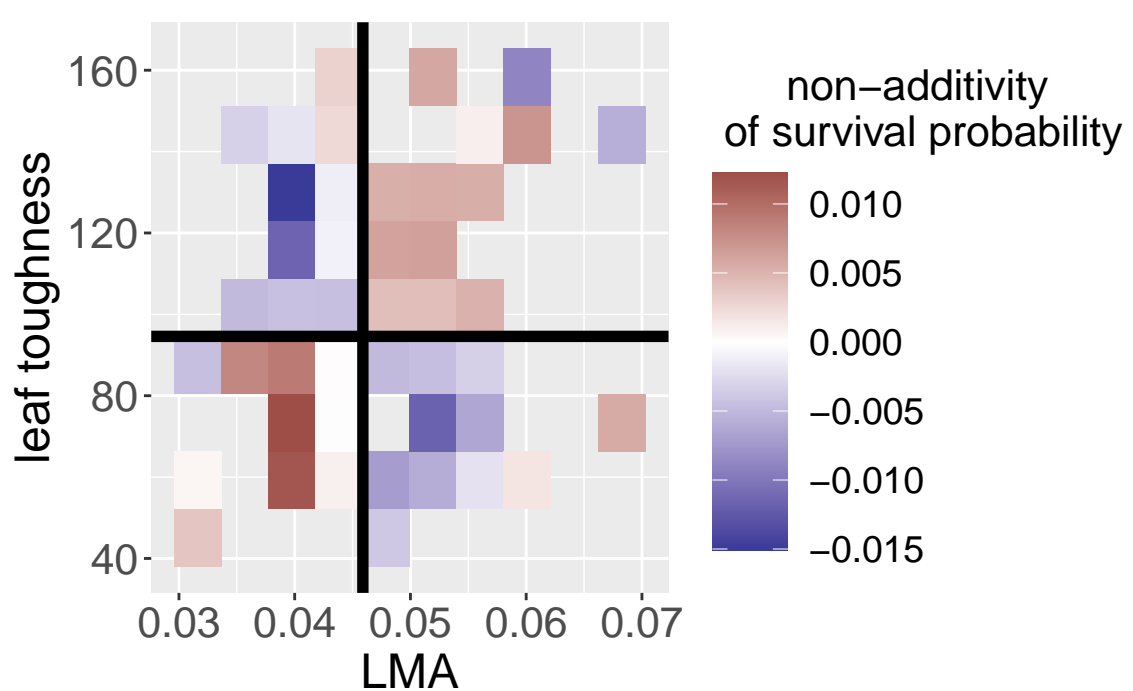

**(at)**

Monarch Survival

Random Forest predictions

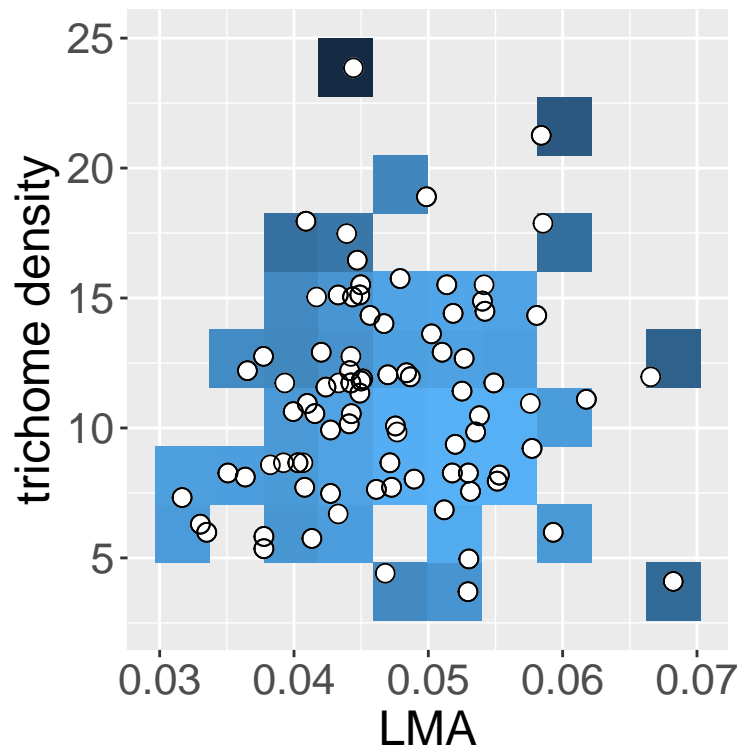

classification : unclear

 $\theta = -0.389$ , null 95%:  $-0.447$  --  $0.444$ 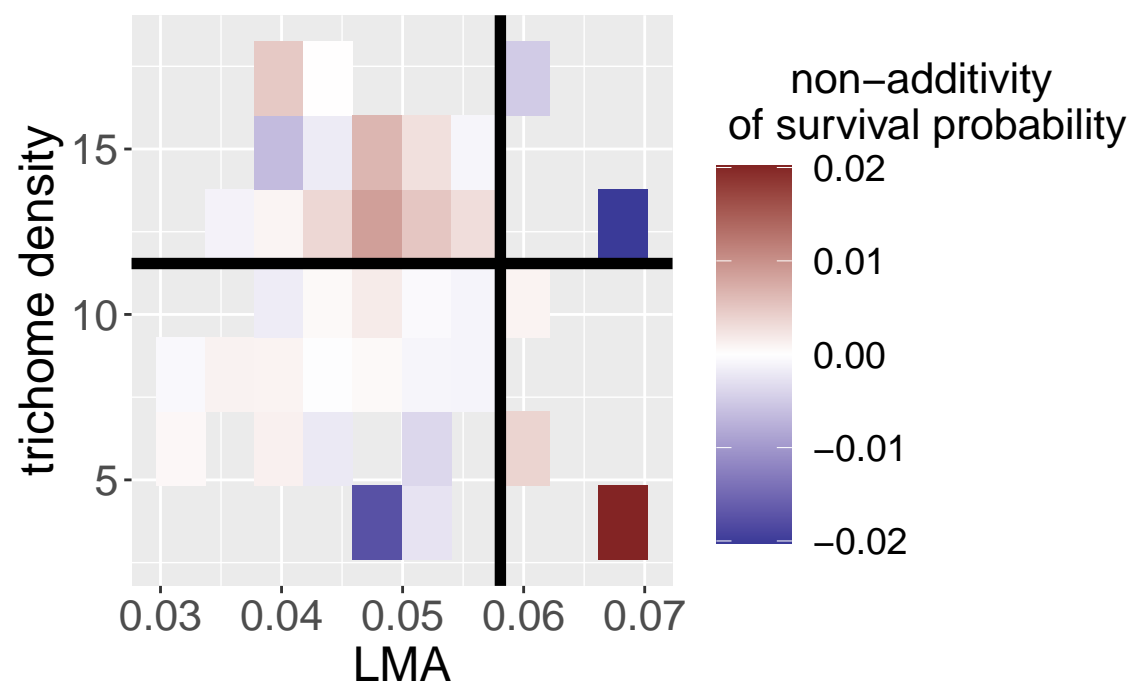**(au)**

Monarch Survival

Random Forest predictions

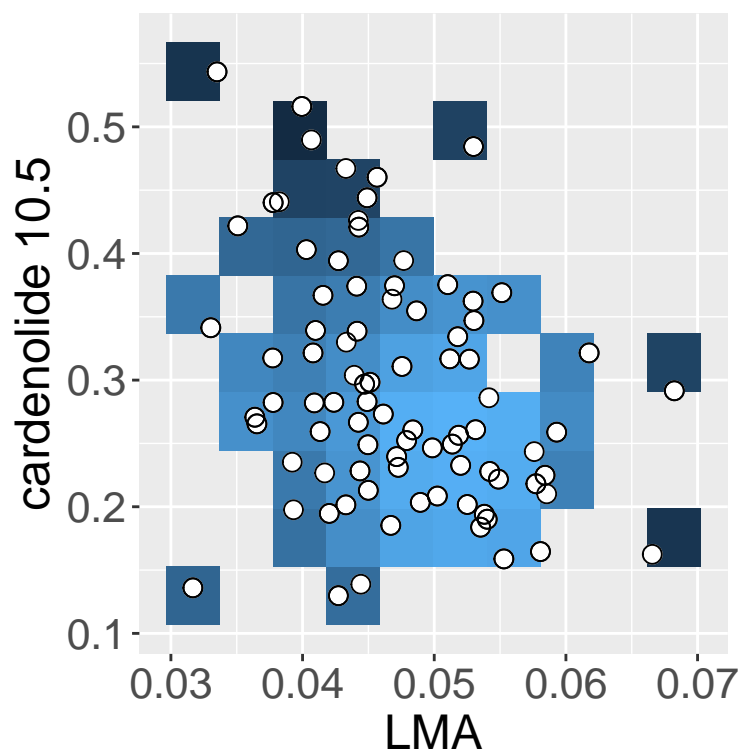

classification : synergy

 $\theta = -0.667$ , null 95%:  $-0.429$  --  $0.429$ 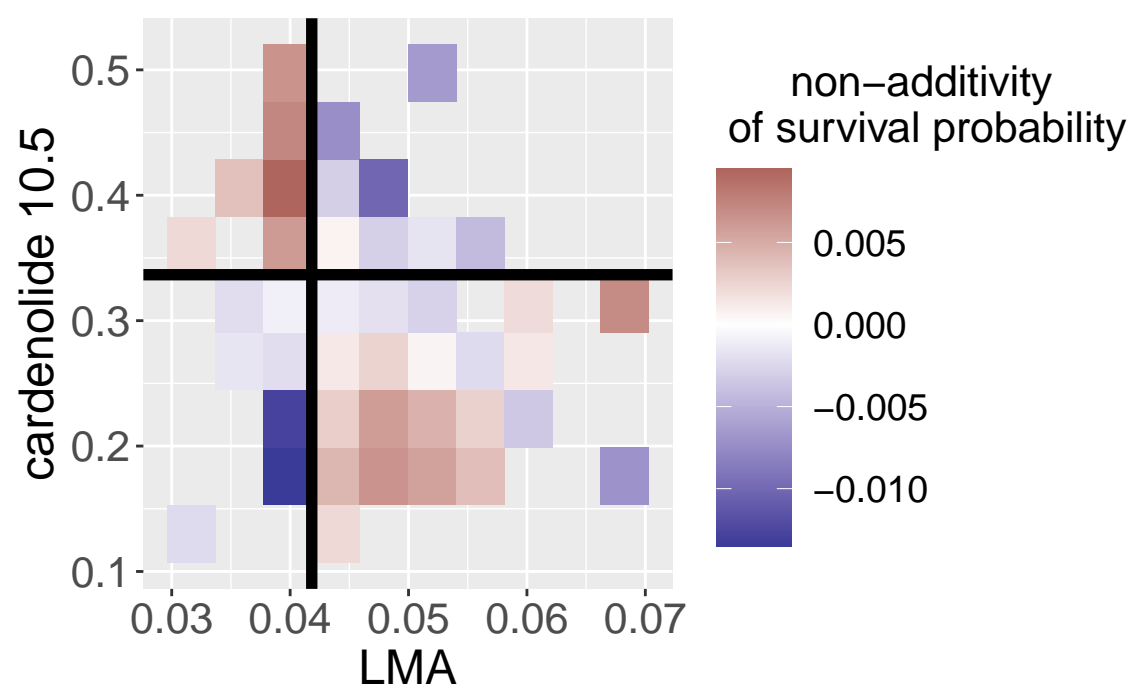**(av)**

Monarch Survival

Random Forest predictions

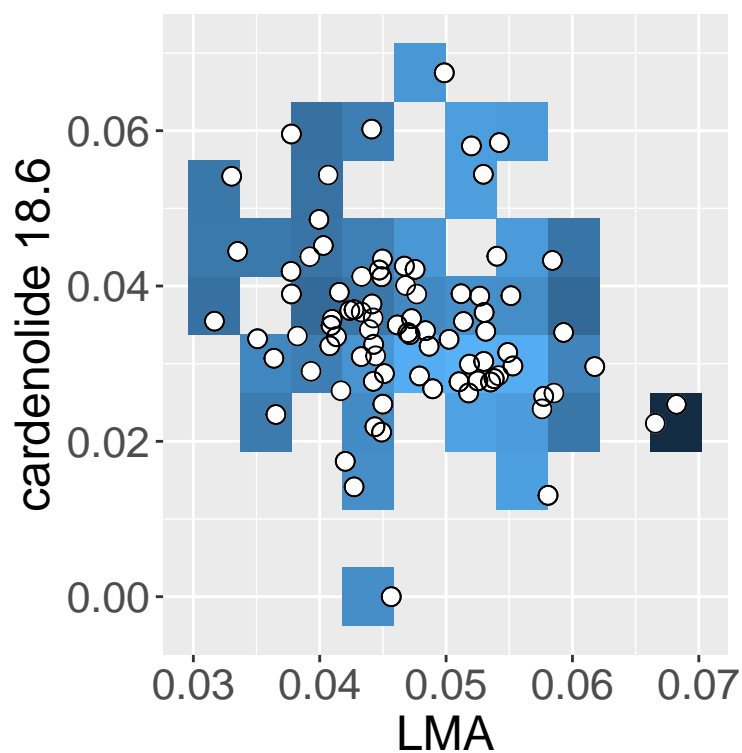

classification : unclear

 $\theta = 0.429$ , null 95%:  $-0.486$  --  $0.486$ 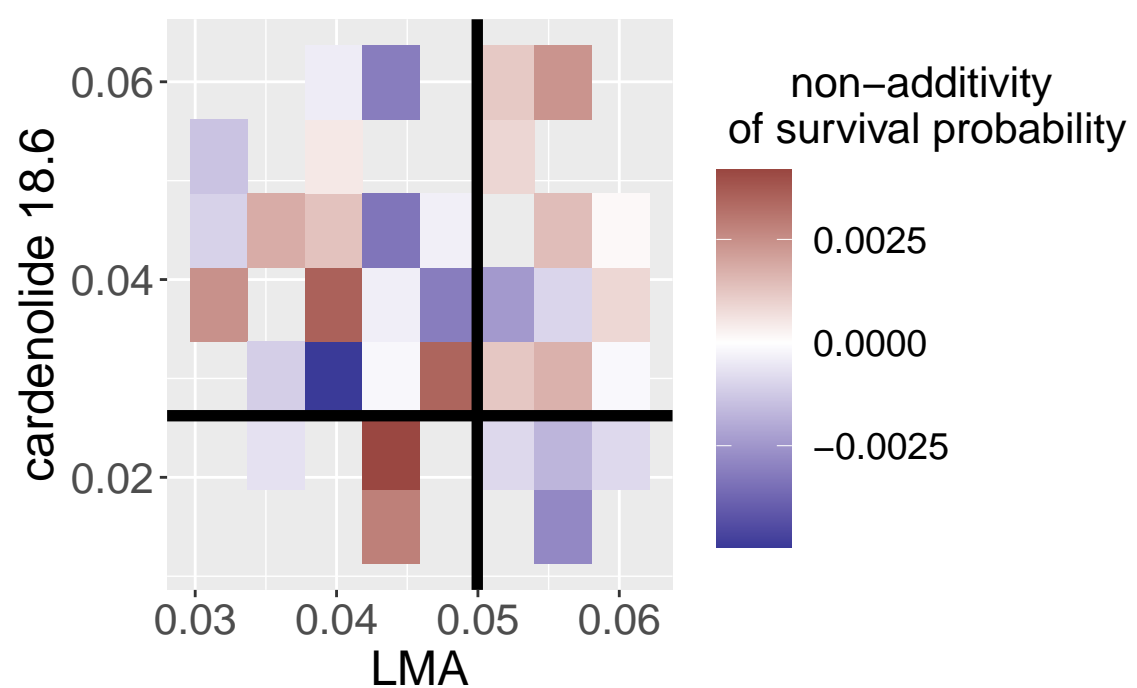



(aw)

Monarch Survival

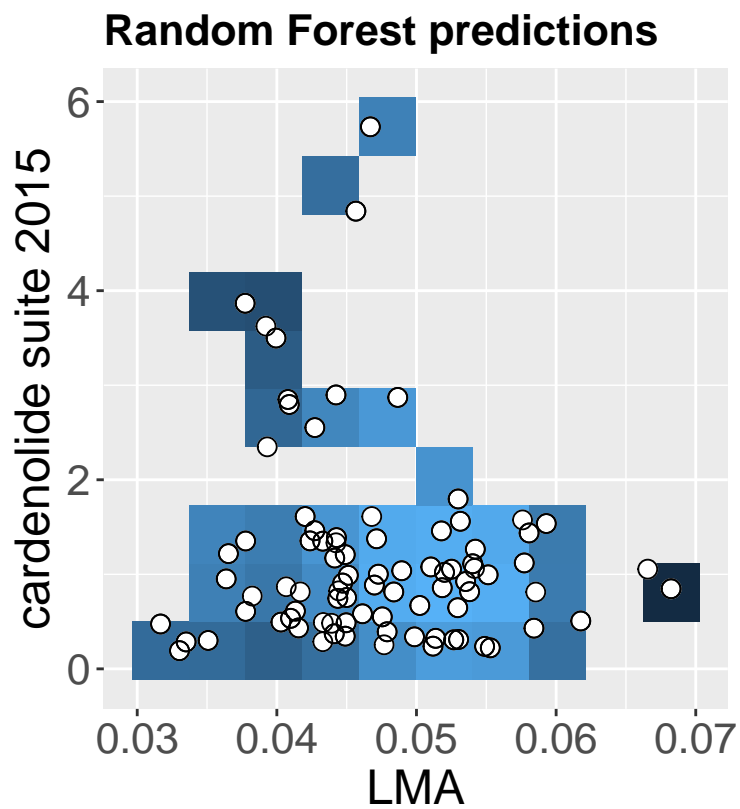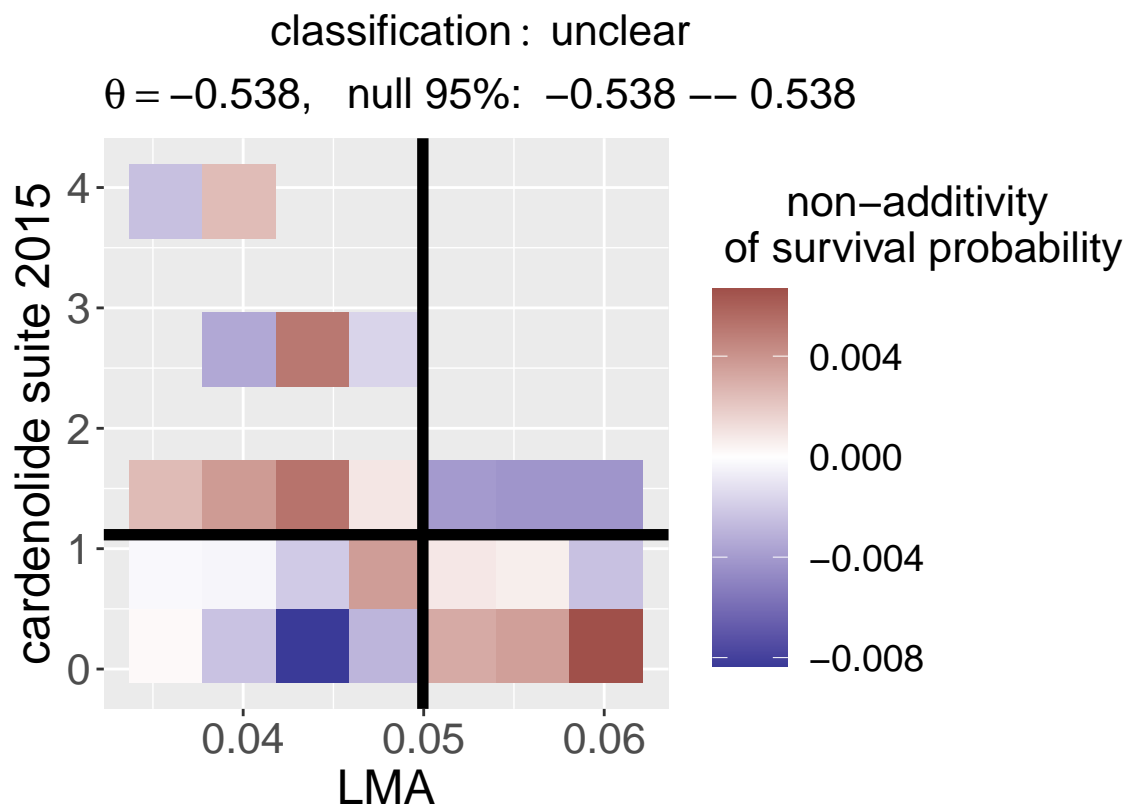

(ax)

Monarch Survival

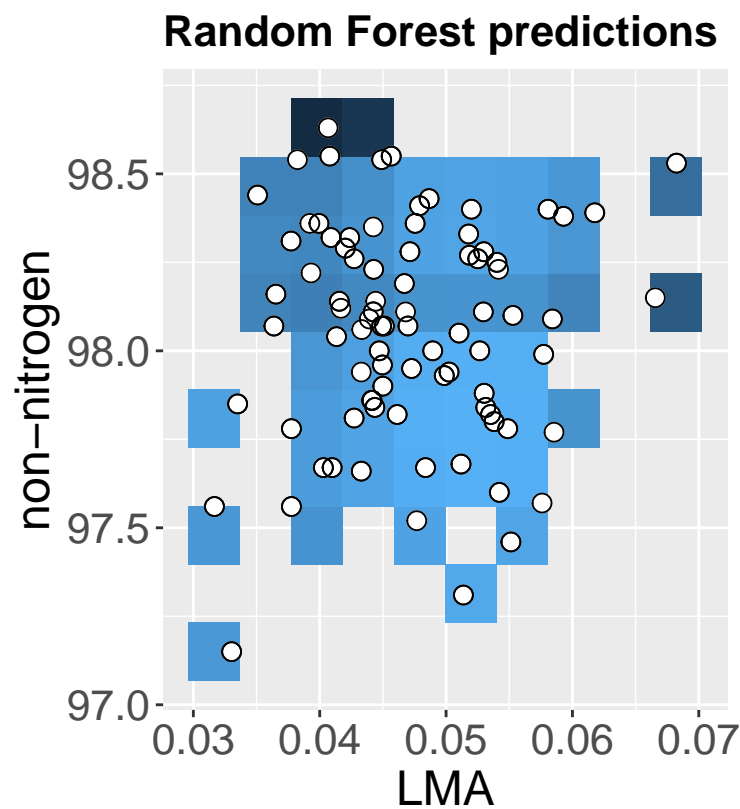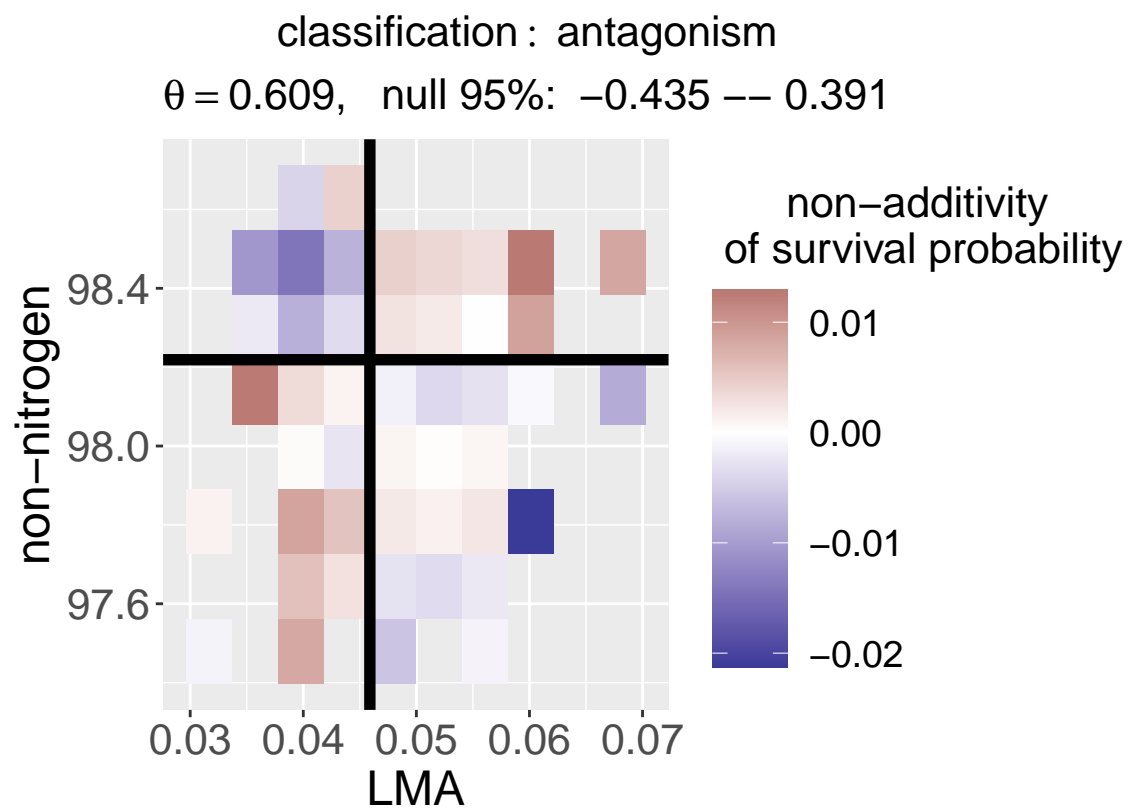

(ay)

Monarch Survival

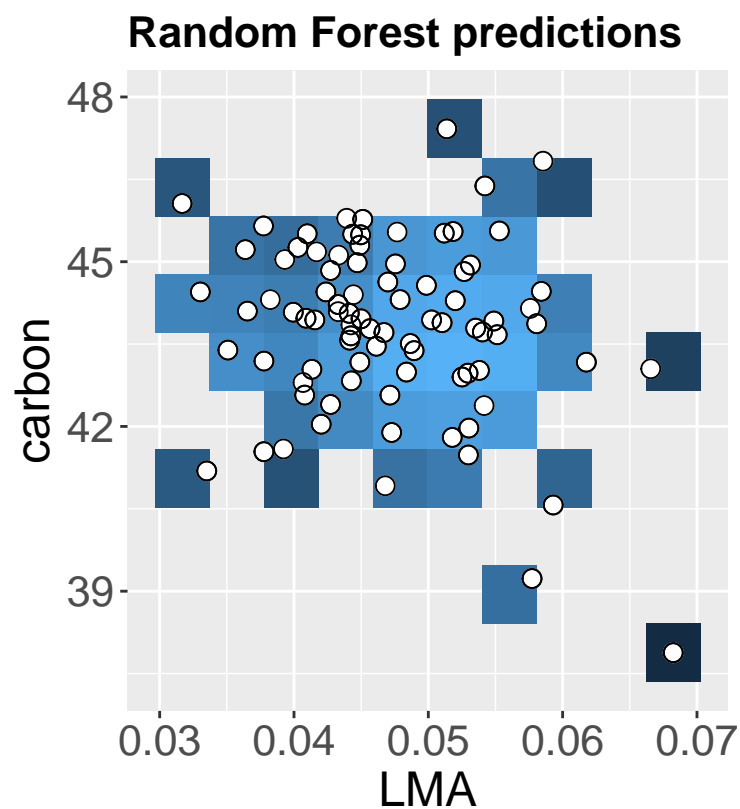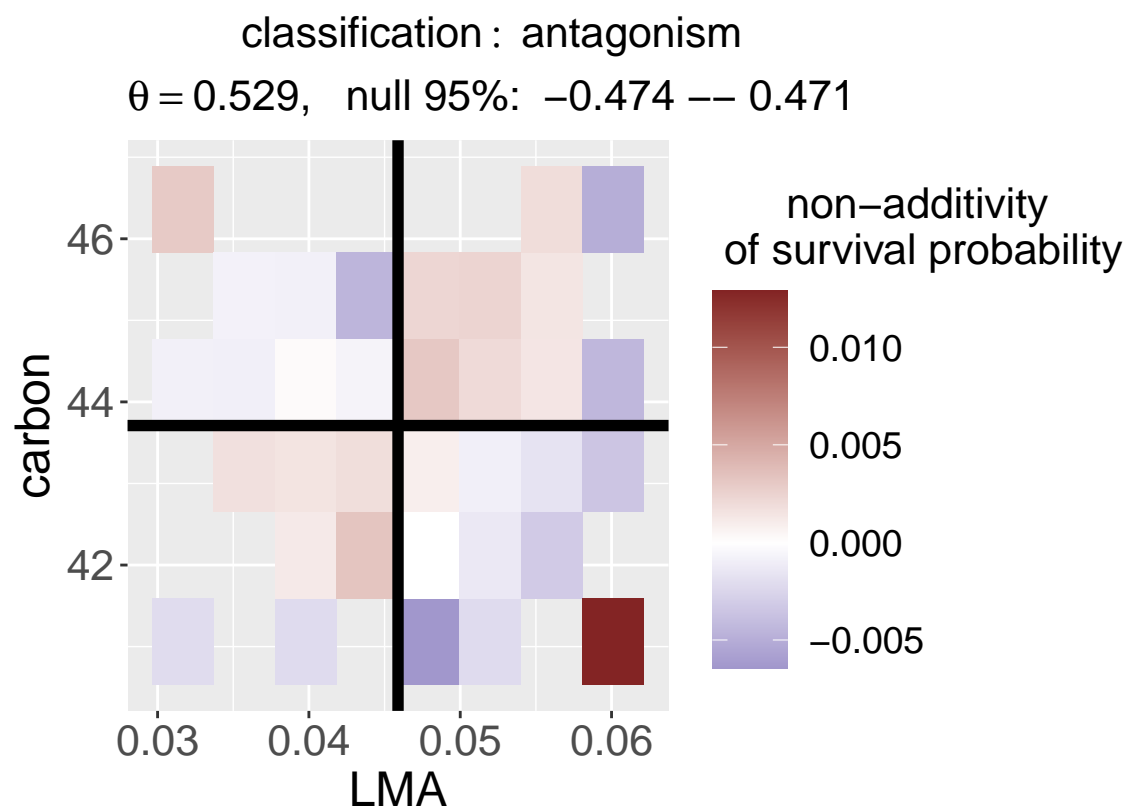

**(az)**

Monarch Survival

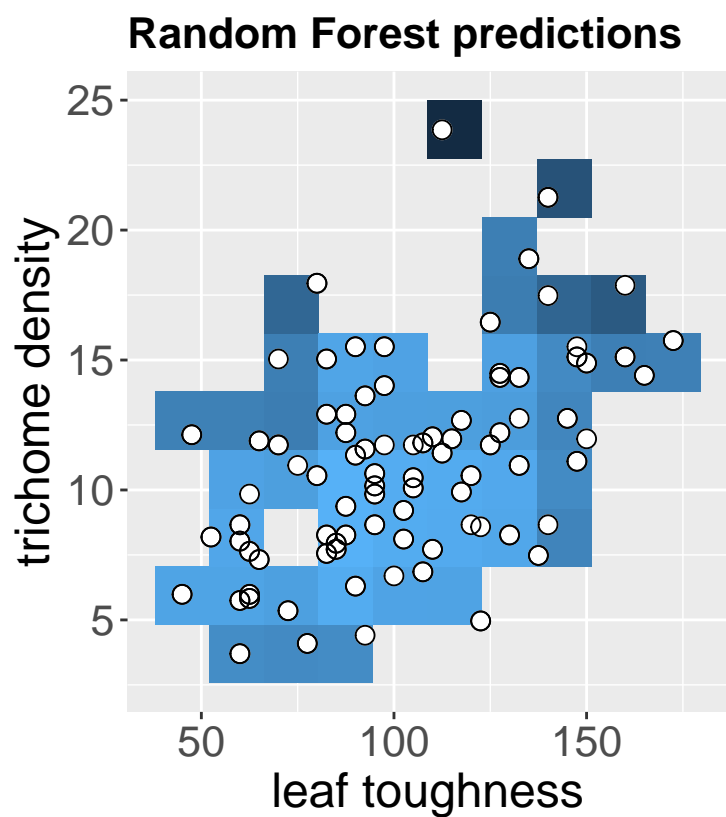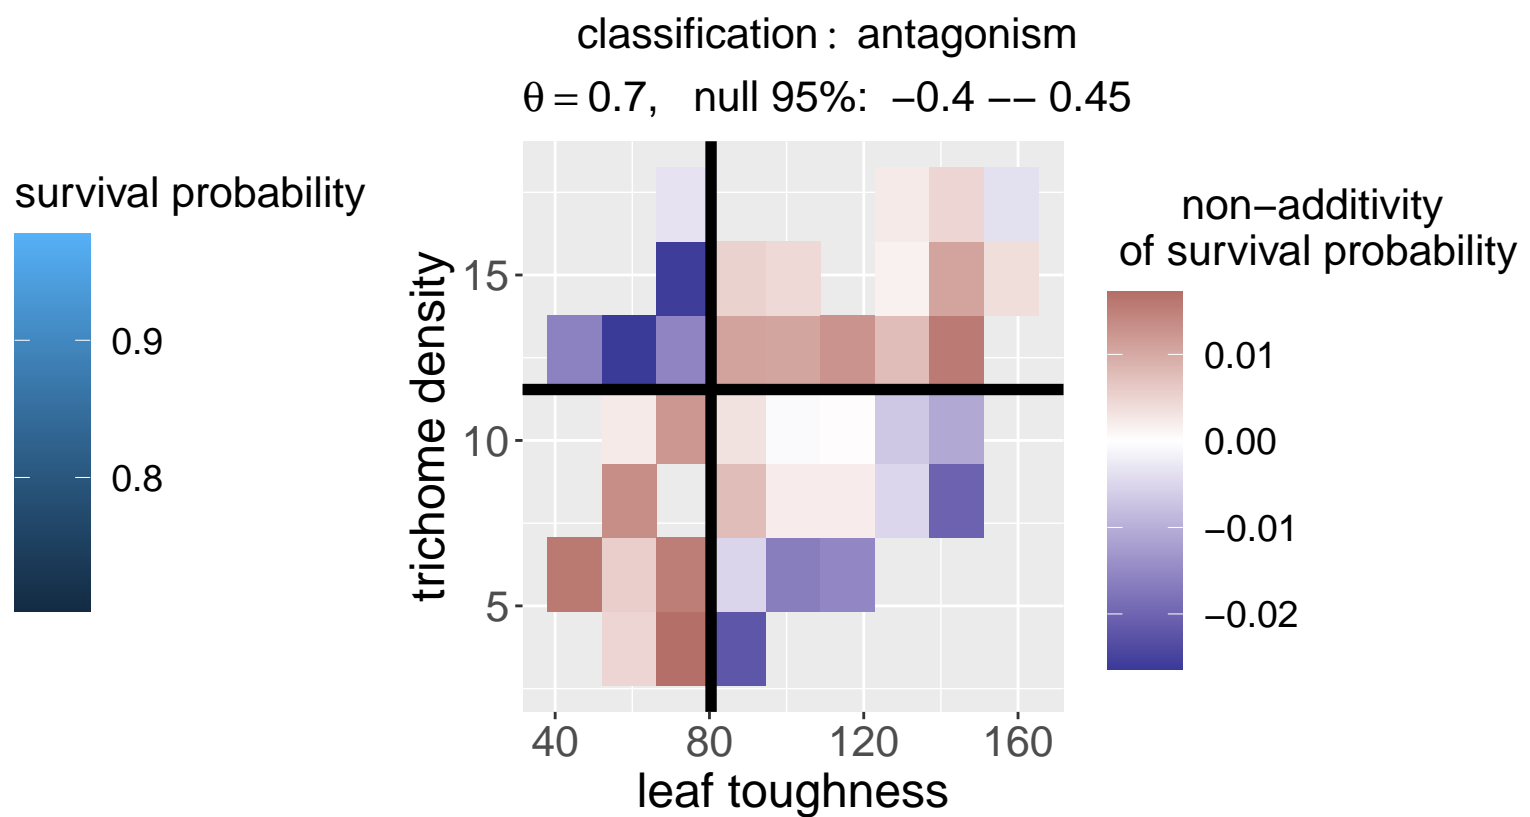**(ba)**

Monarch Survival

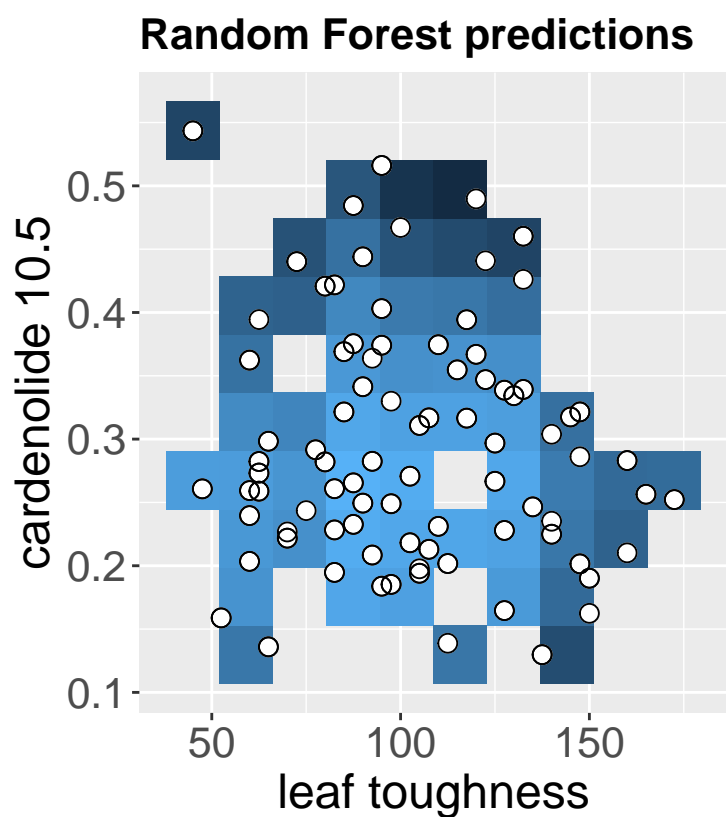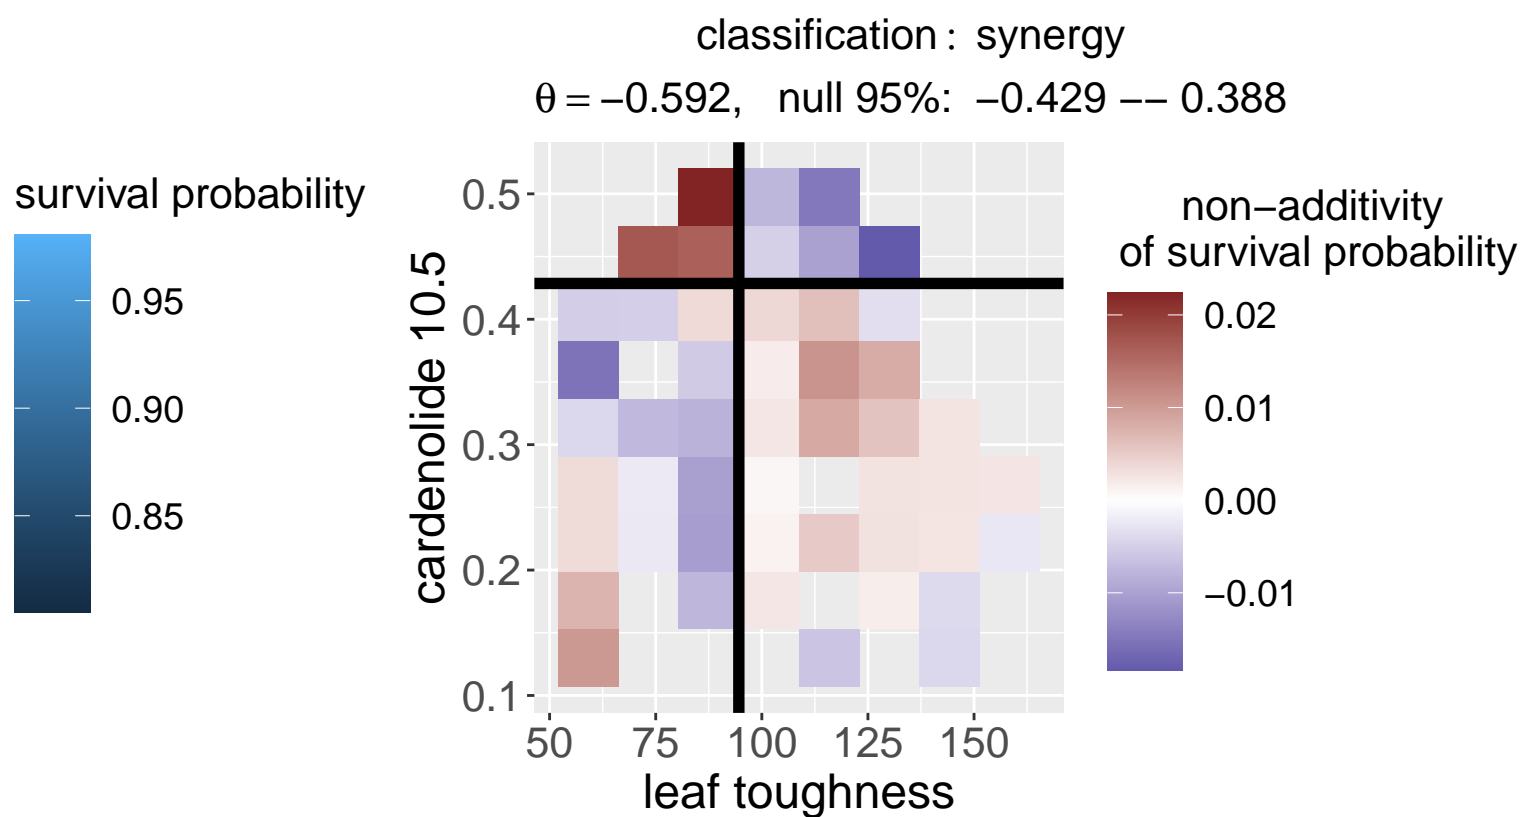**(bb)**

Monarch Survival

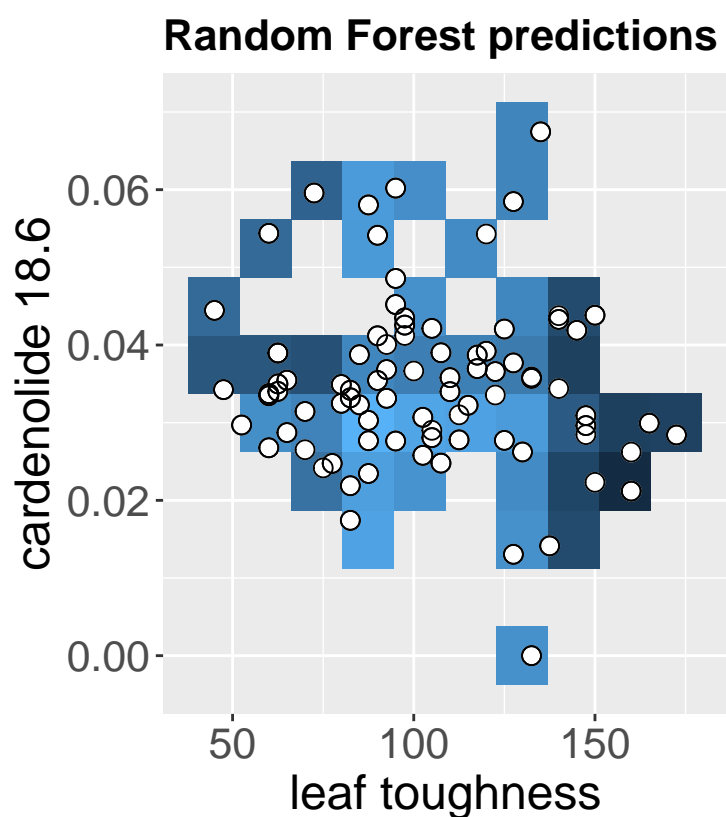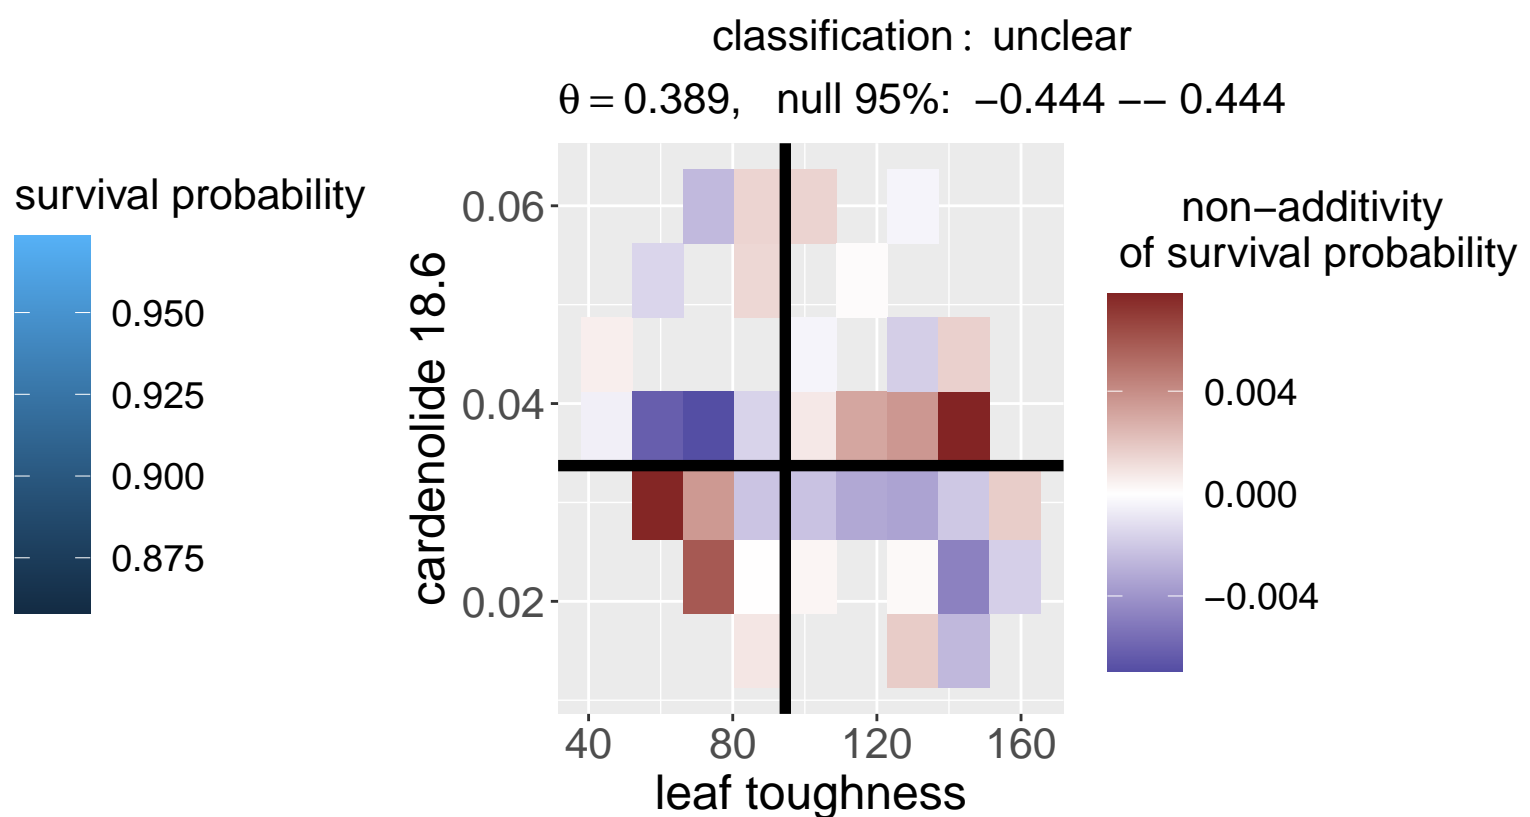

**(bc)**

Monarch Survival

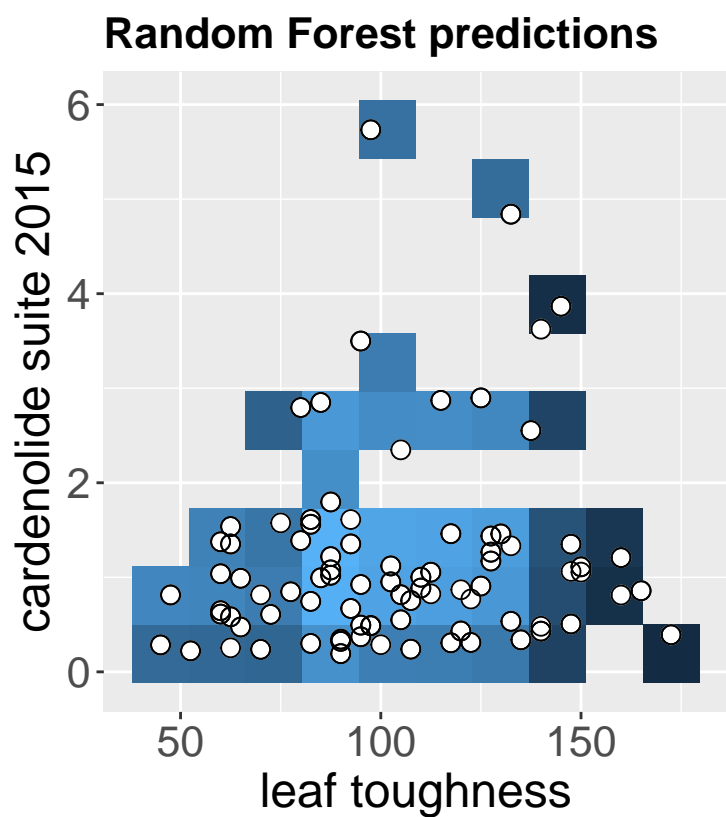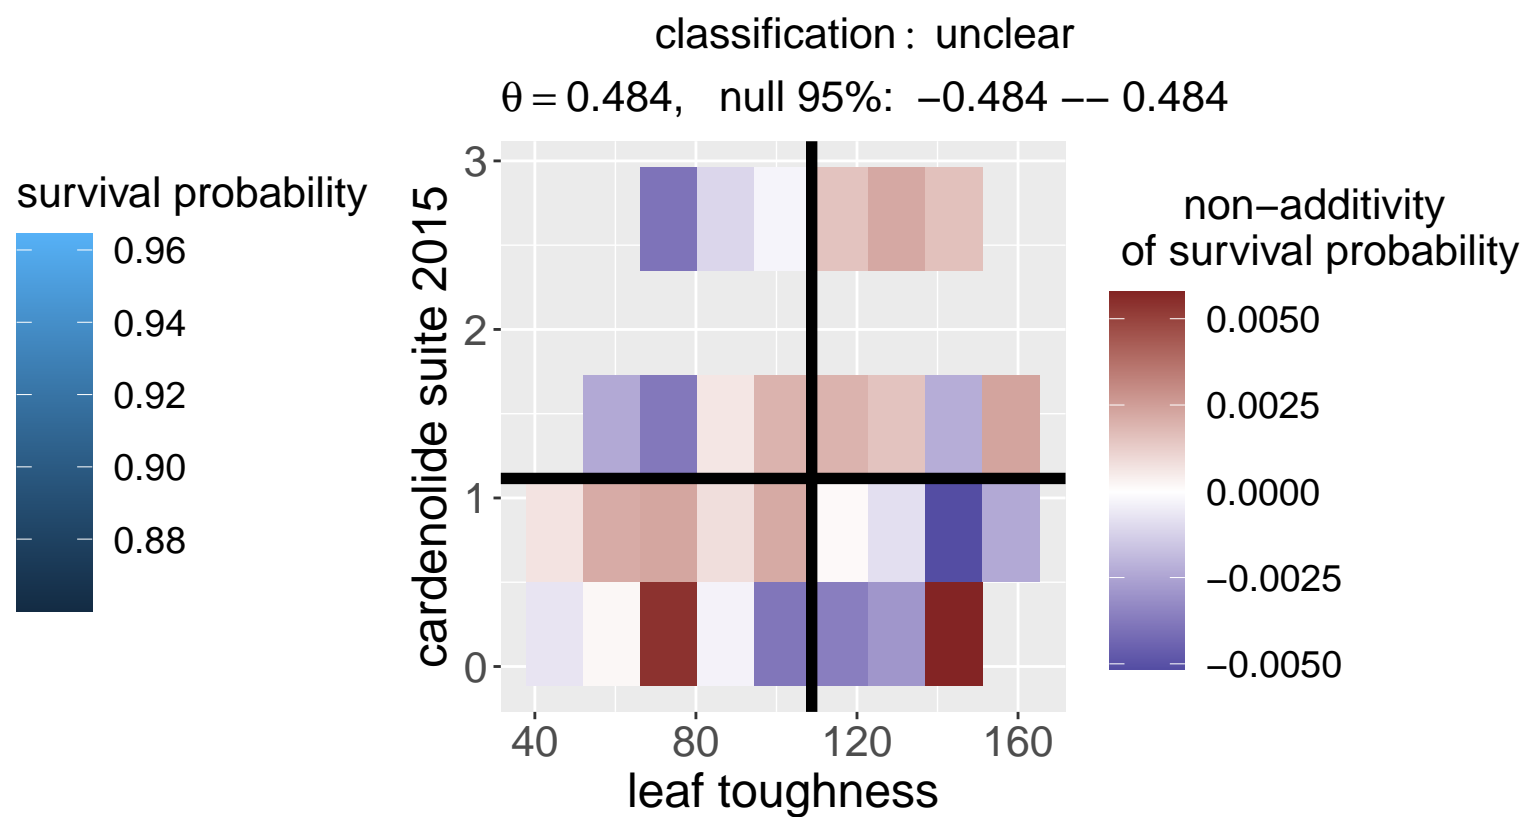**(bd)**

Monarch Survival

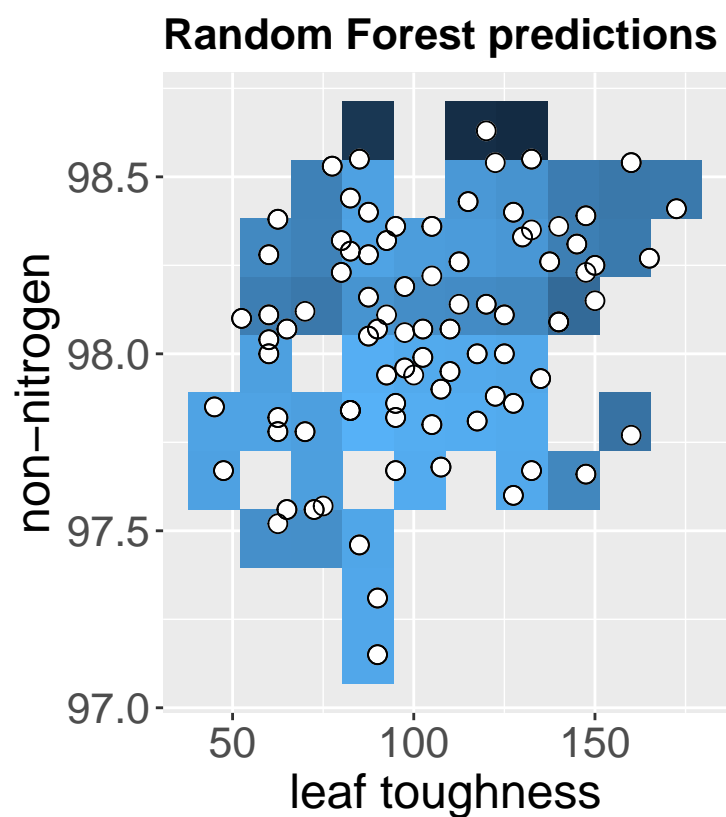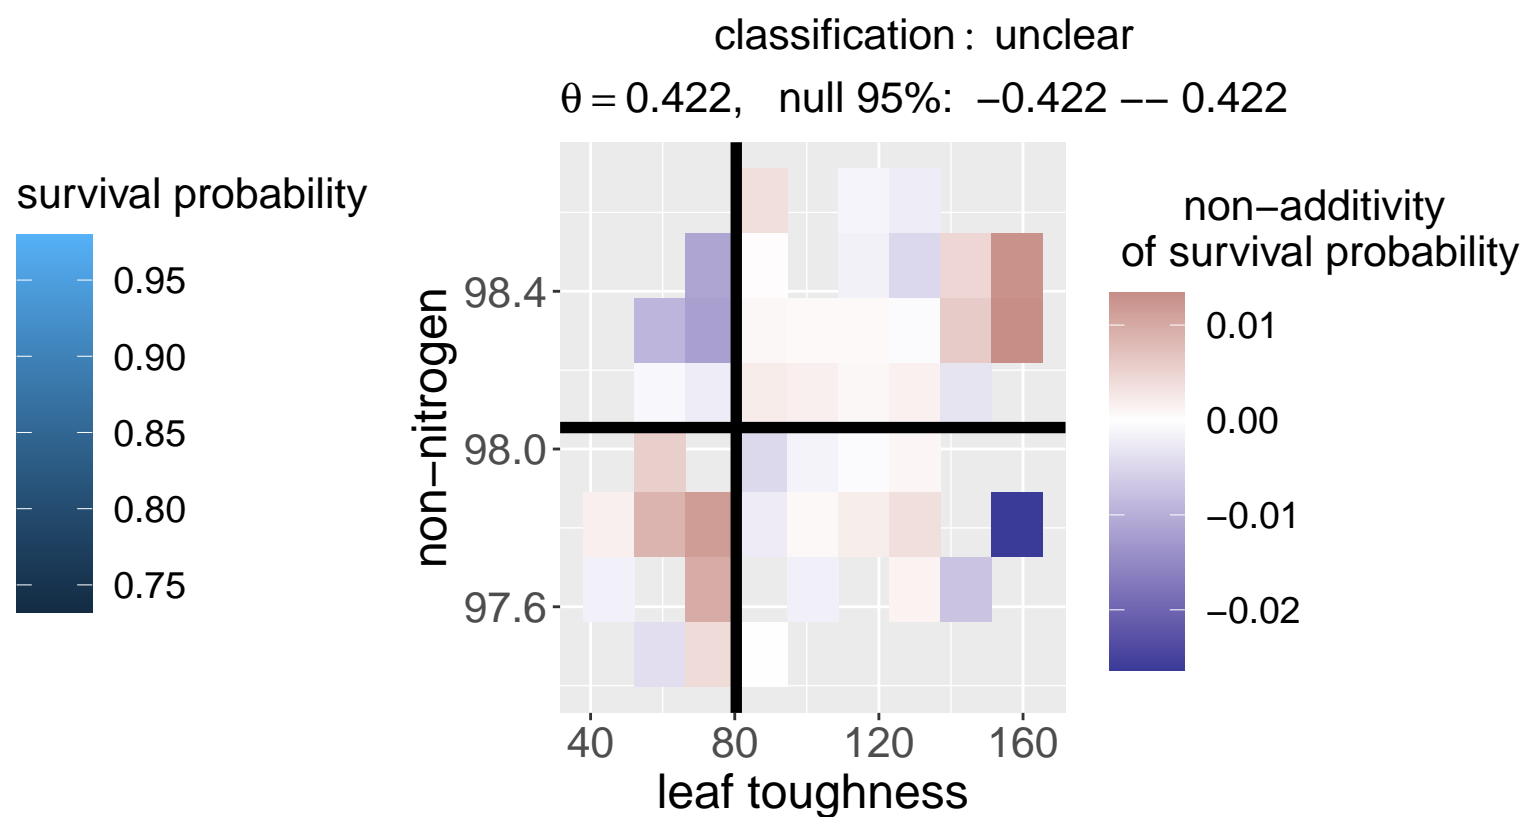**(be)**

Monarch Survival

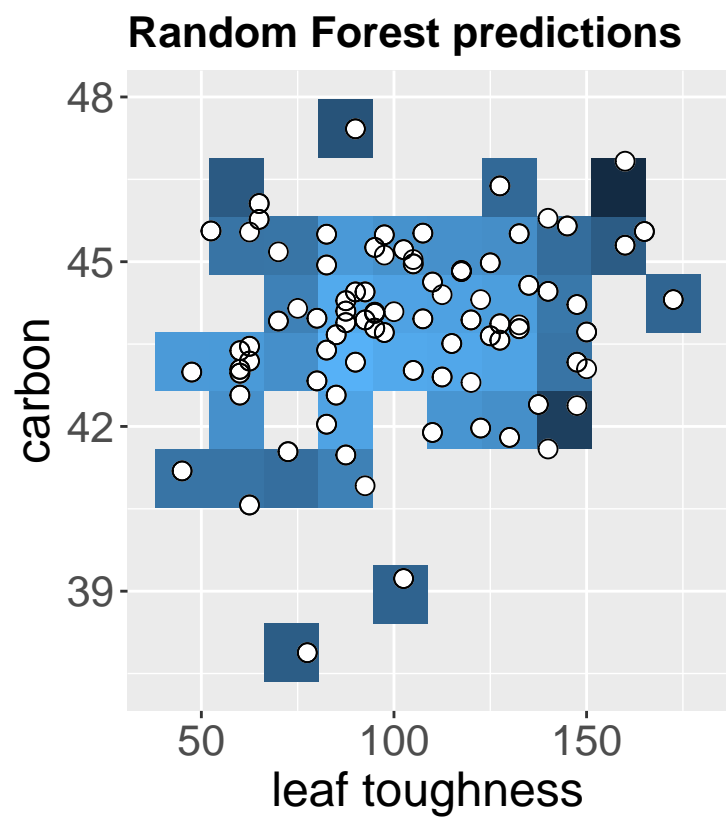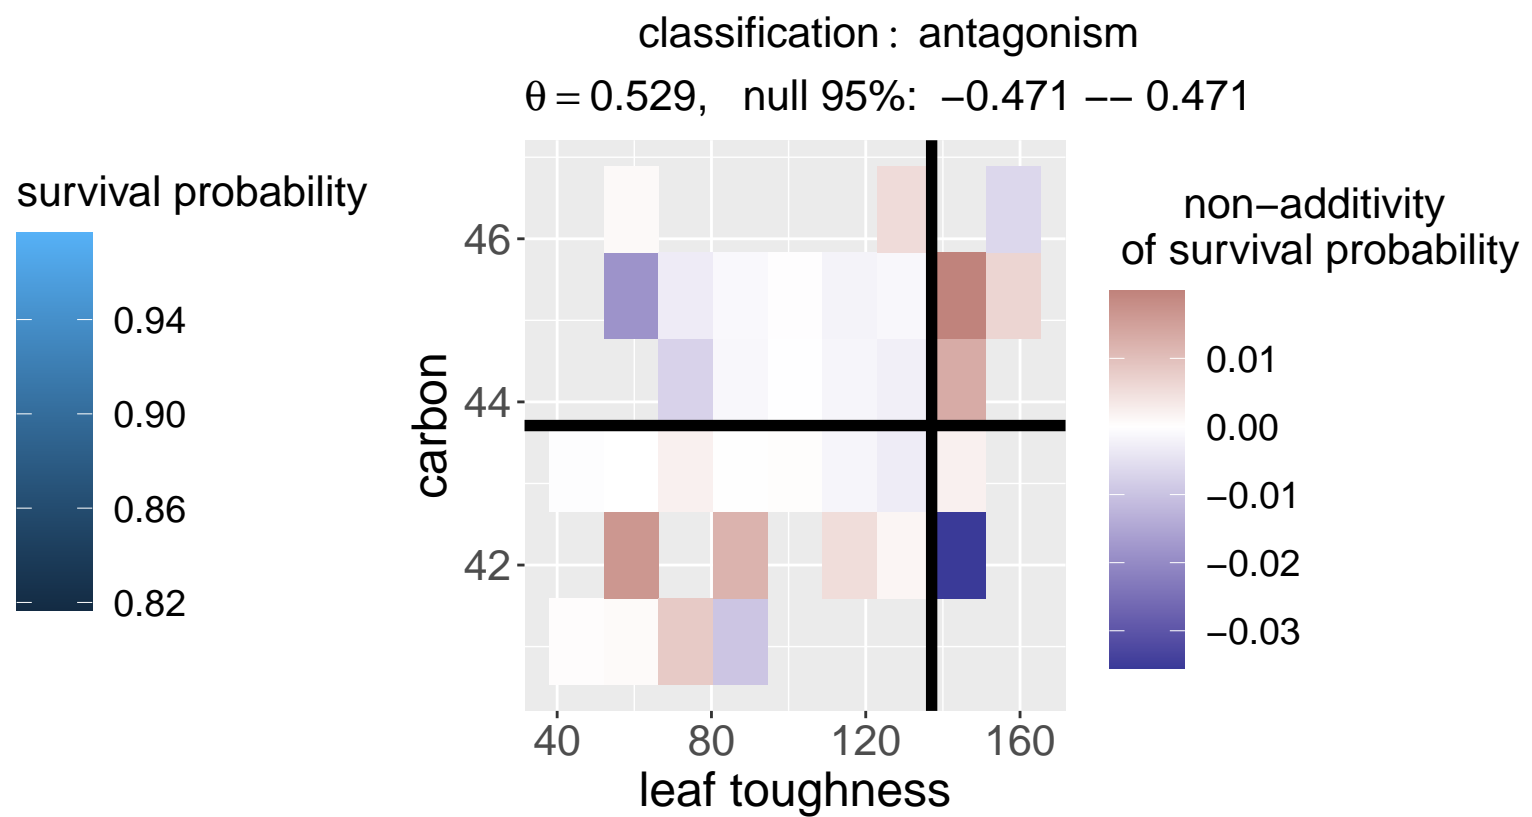

**(bf)****Random Forest predictions**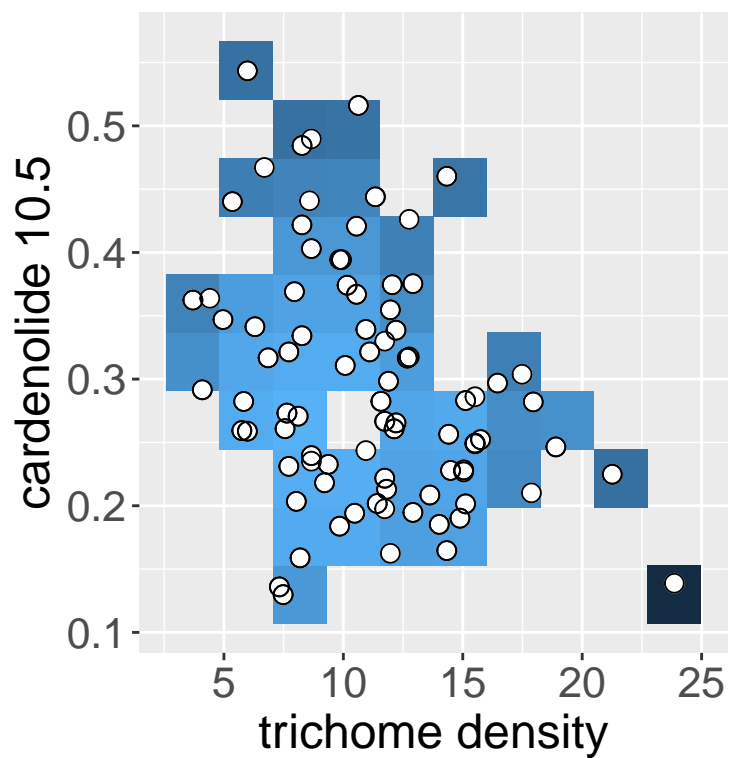**Monarch Survival**

classification : synergy

 $\theta = -0.765$ , null 95%:  $-0.529$  --  $0.471$ 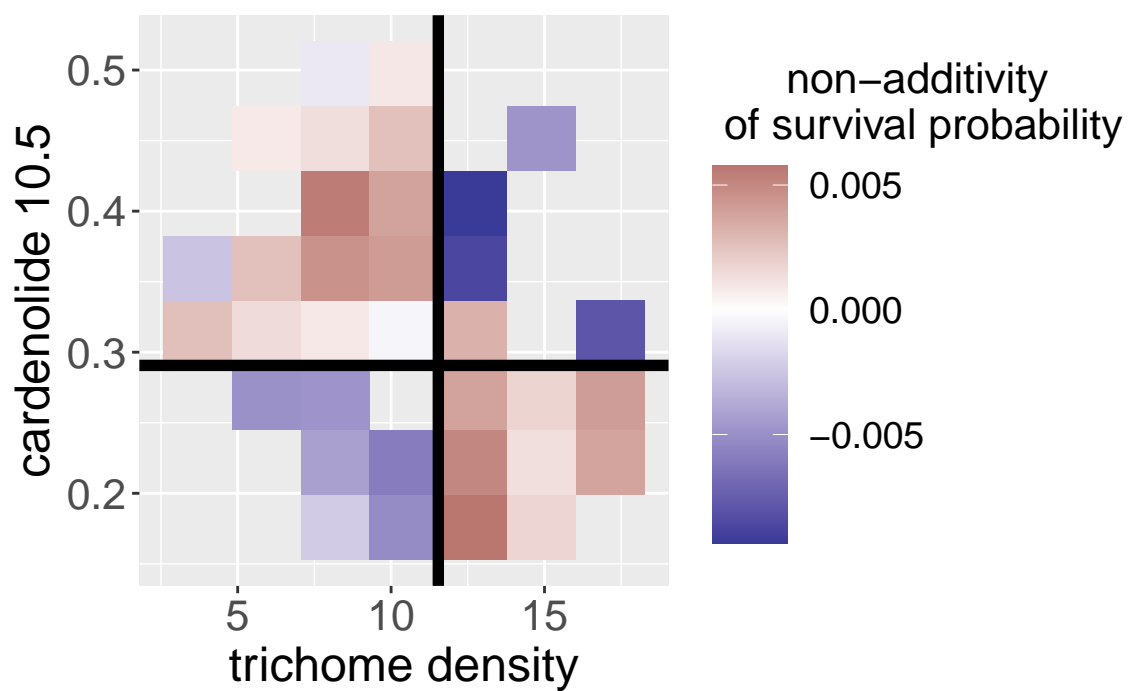**(bg)****Random Forest predictions**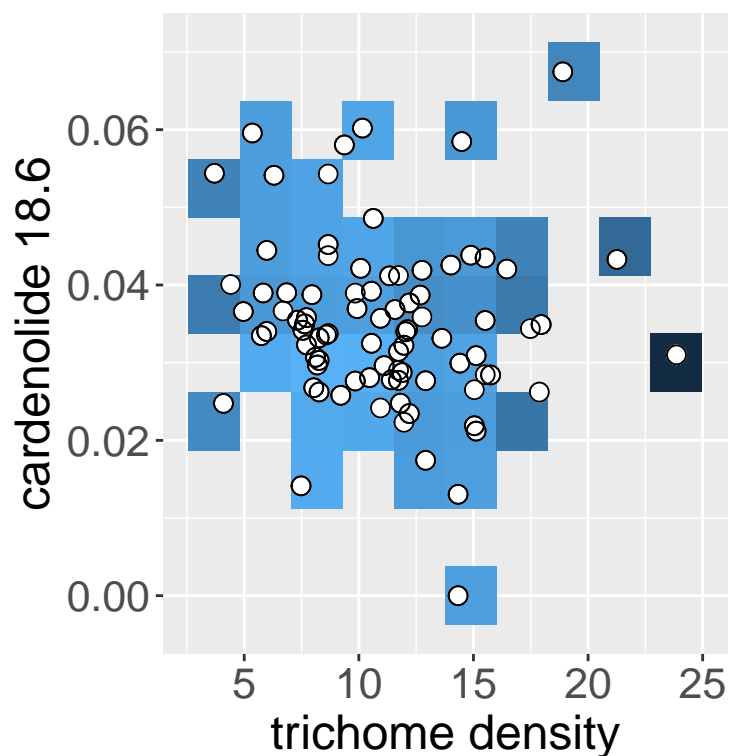**Monarch Survival**

classification : unclear

 $\theta = 0.455$ , null 95%:  $-0.515$  --  $0.455$ 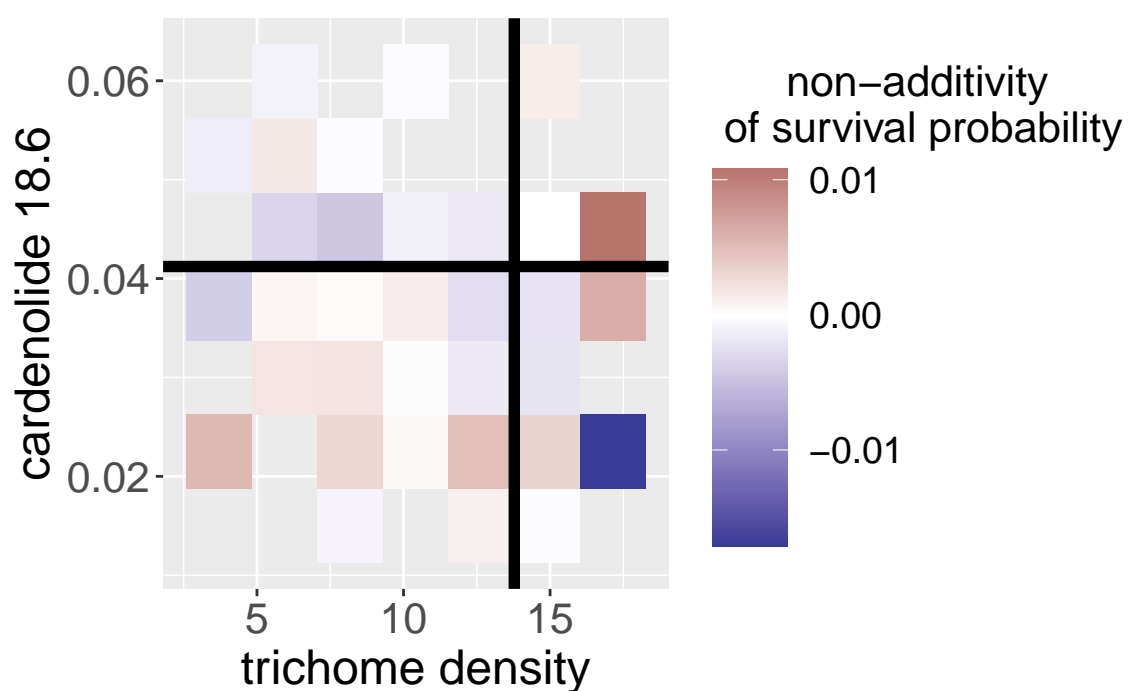**(bh)****Random Forest predictions**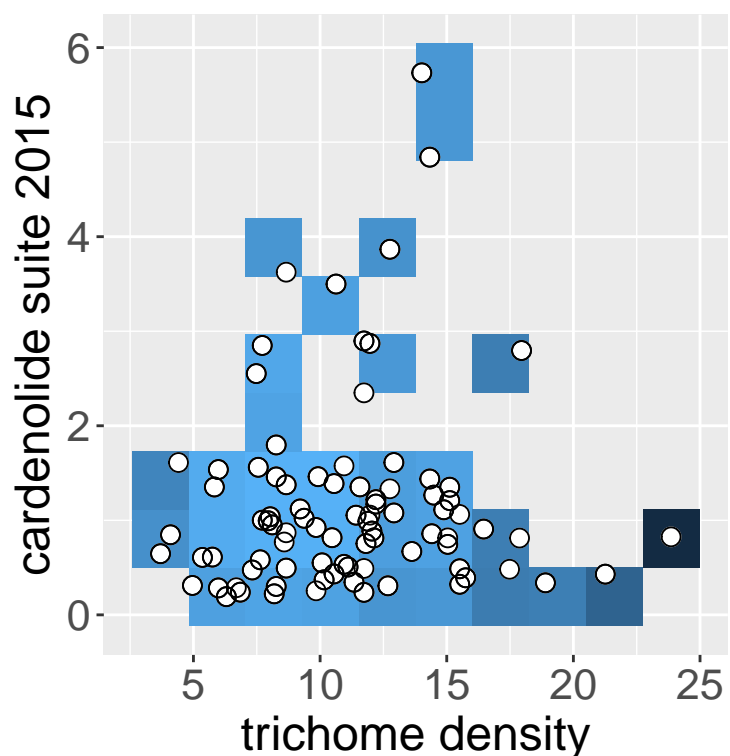**Monarch Survival**

classification : unclear

 $\theta = 0.417$ , null 95%:  $-0.583$  --  $0.583$ 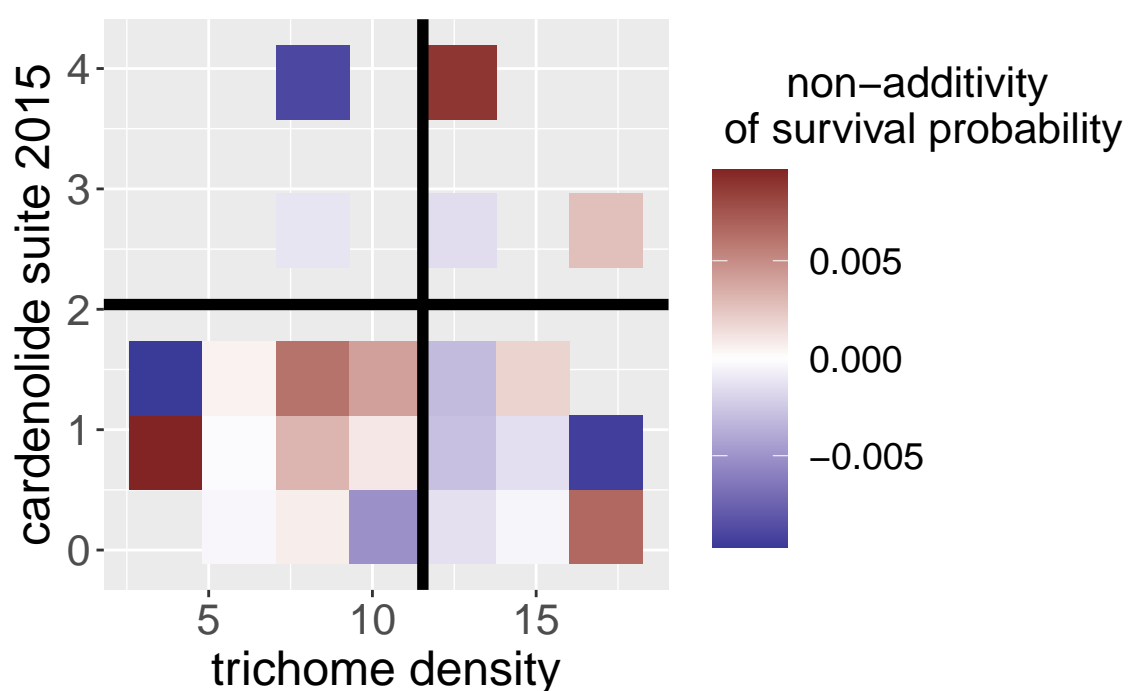

**(bi)**

## Monarch Survival

classification : synergy

 $\theta = -0.737$ , null 95%:  $-0.421$  --  $0.474$ 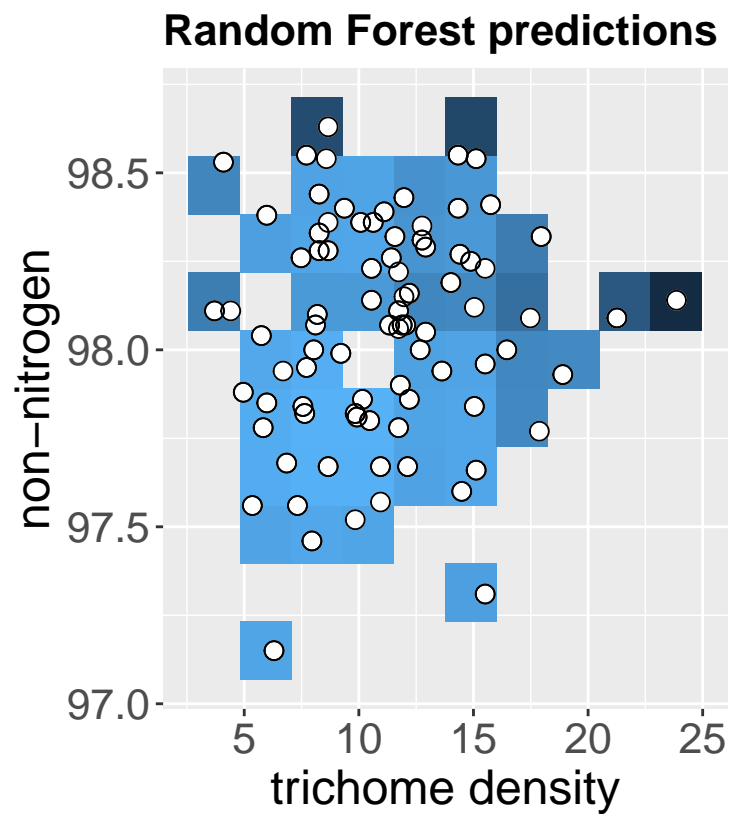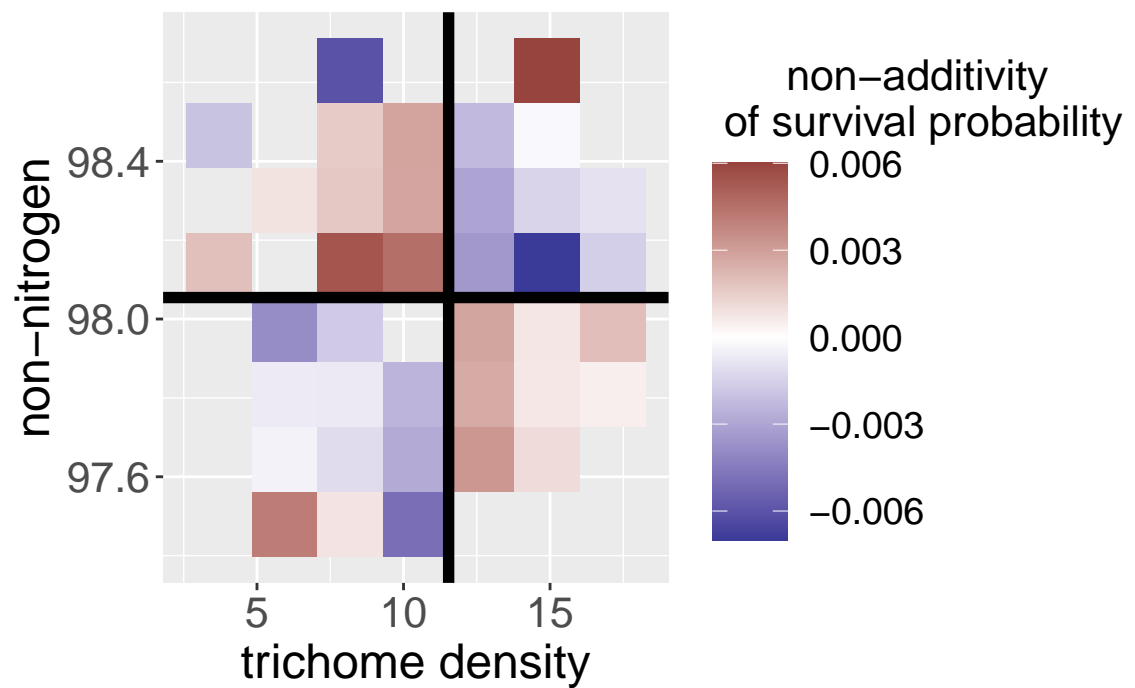**(bj)**

## Monarch Survival

classification : antagonism

 $\theta = 0.704$ , null 95%:  $-0.481$  --  $0.556$ 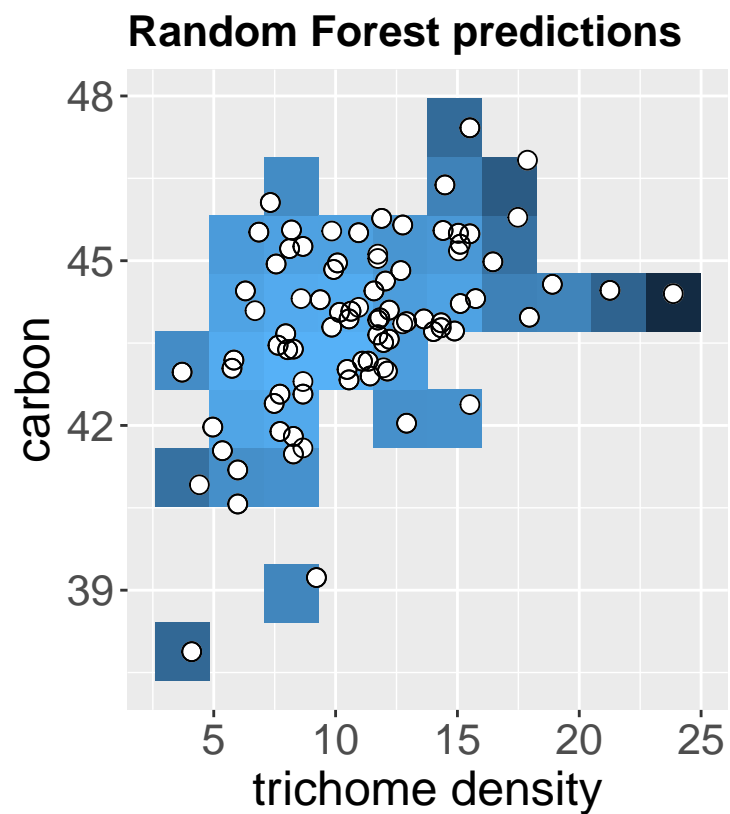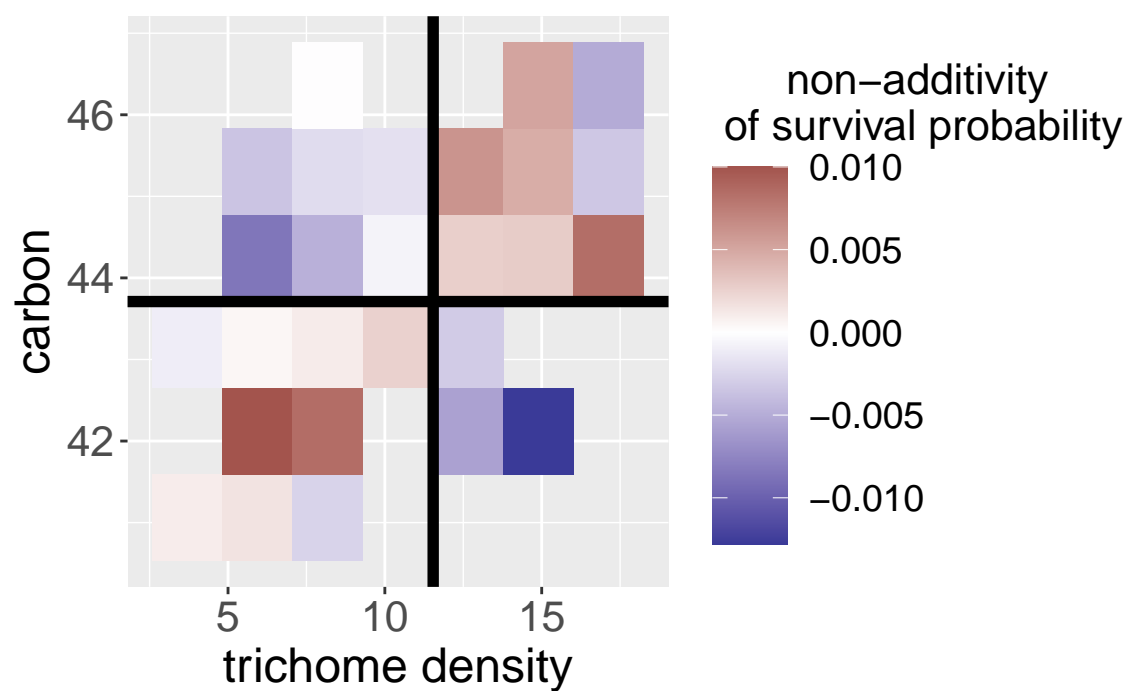**(bk)**

## Monarch Survival

classification : unclear

 $\theta = -0.333$ , null 95%:  $-0.455$  --  $0.515$ 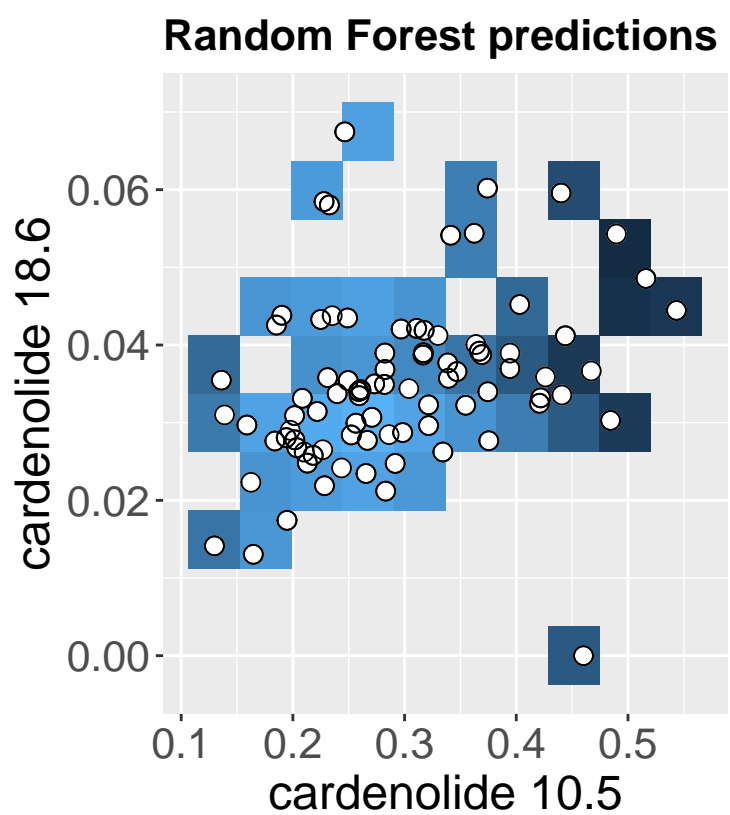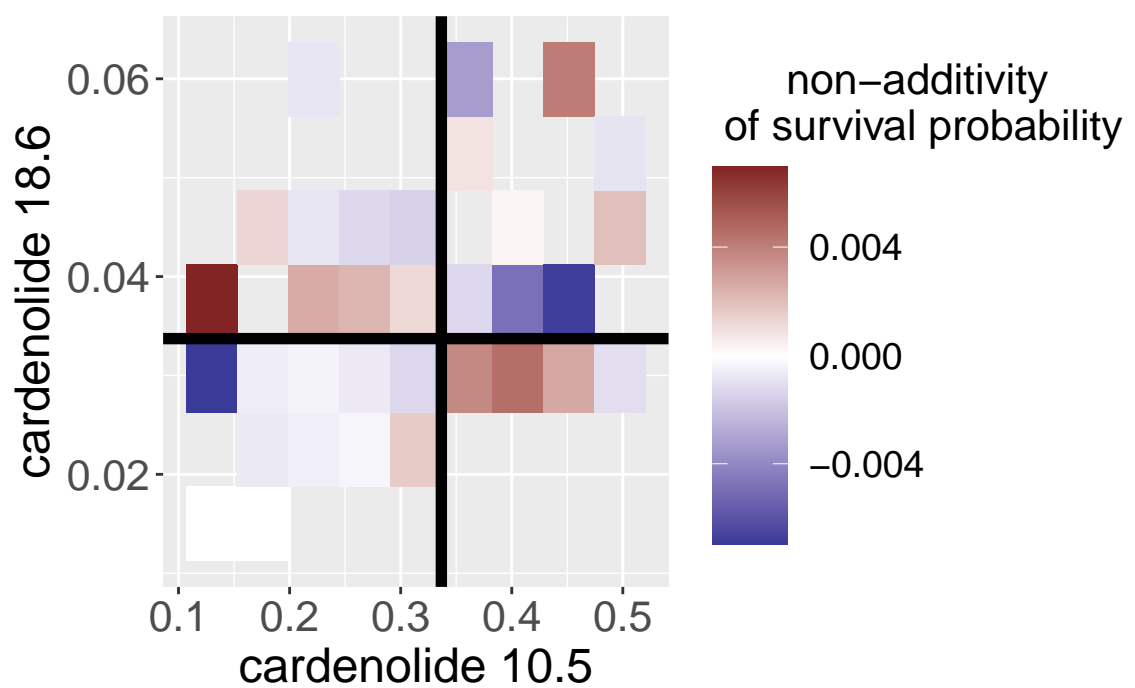

**(bl)**

## Monarch Survival

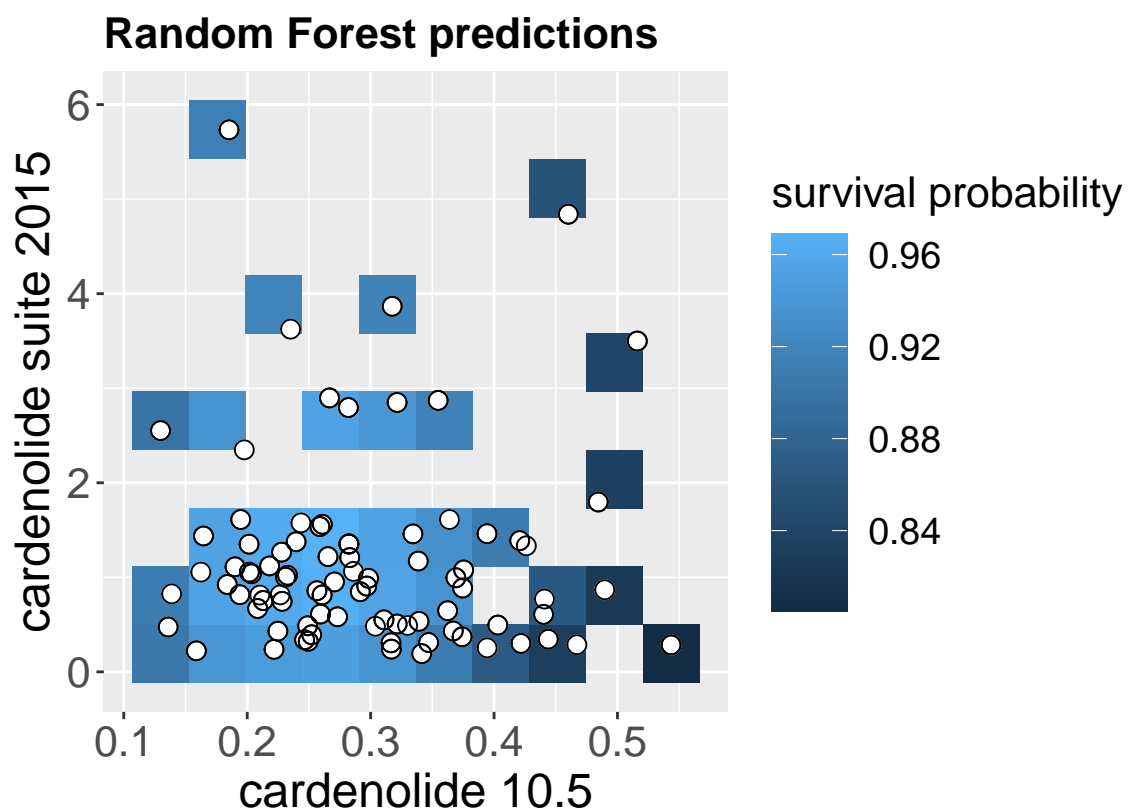

classification : antagonism

 $\theta = 0.714$ , null 95%:  $-0.5$  --  $0.571$ 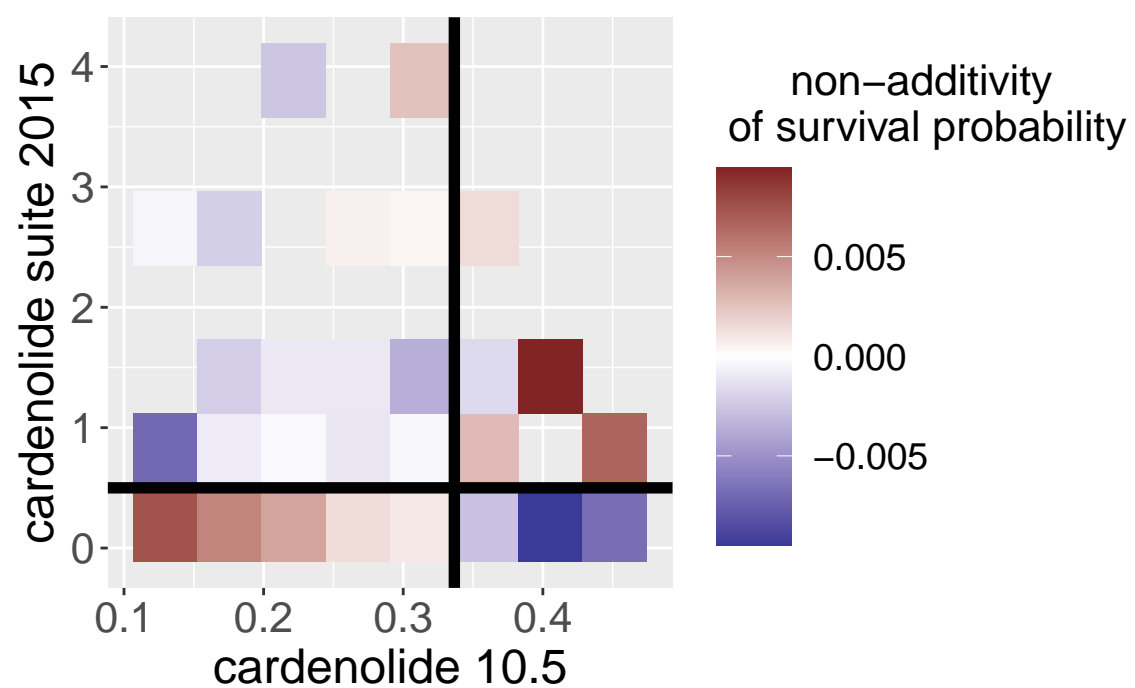**(bm)**

## Monarch Survival

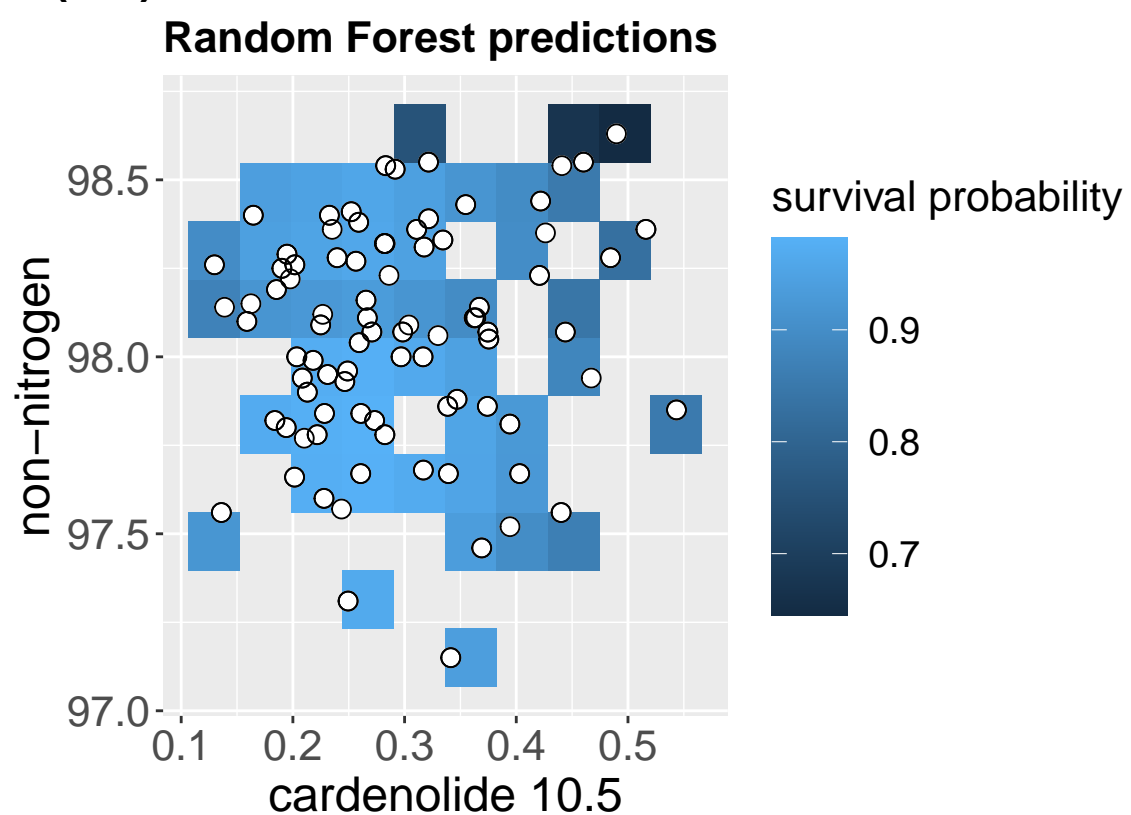

classification : unclear

 $\theta = -0.349$ , null 95%:  $-0.442$  --  $0.442$ 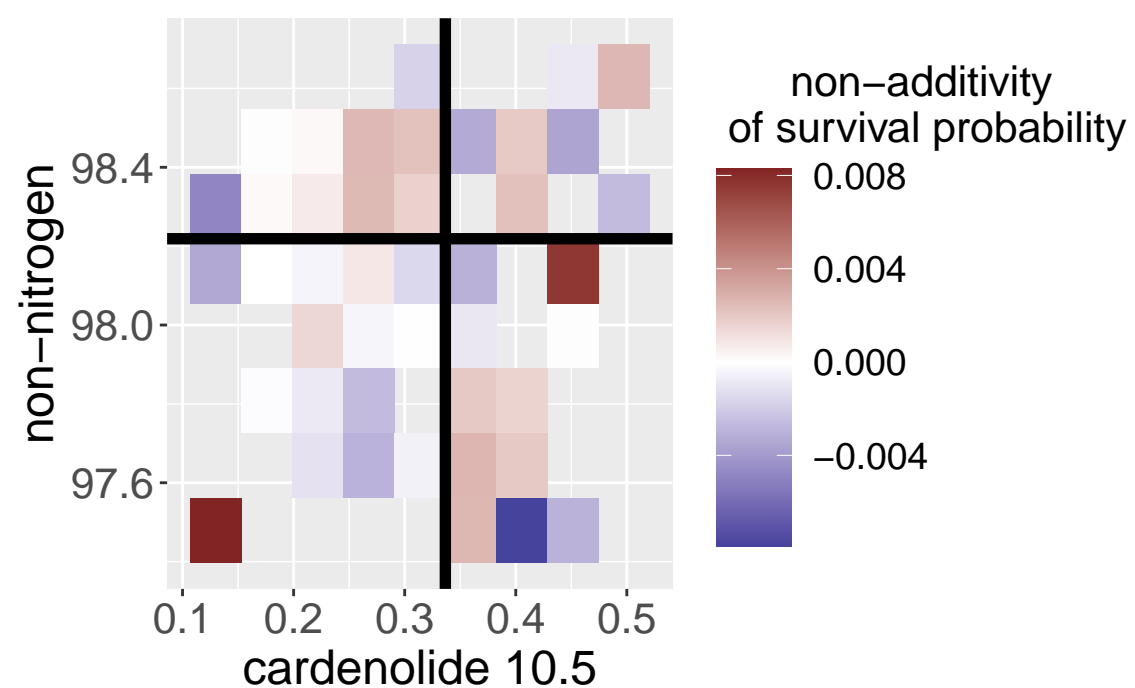**(bn)**

## Monarch Survival

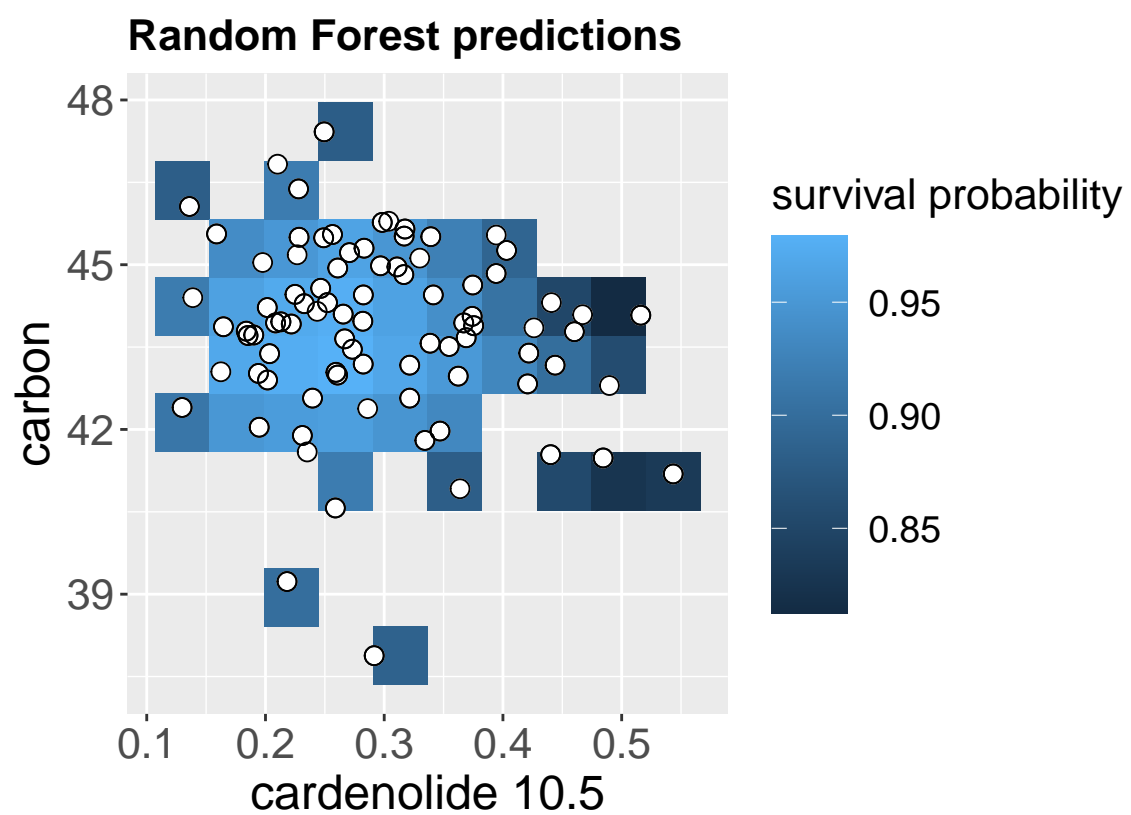

classification : synergy

 $\theta = -0.543$ , null 95%:  $-0.429$  --  $0.429$ 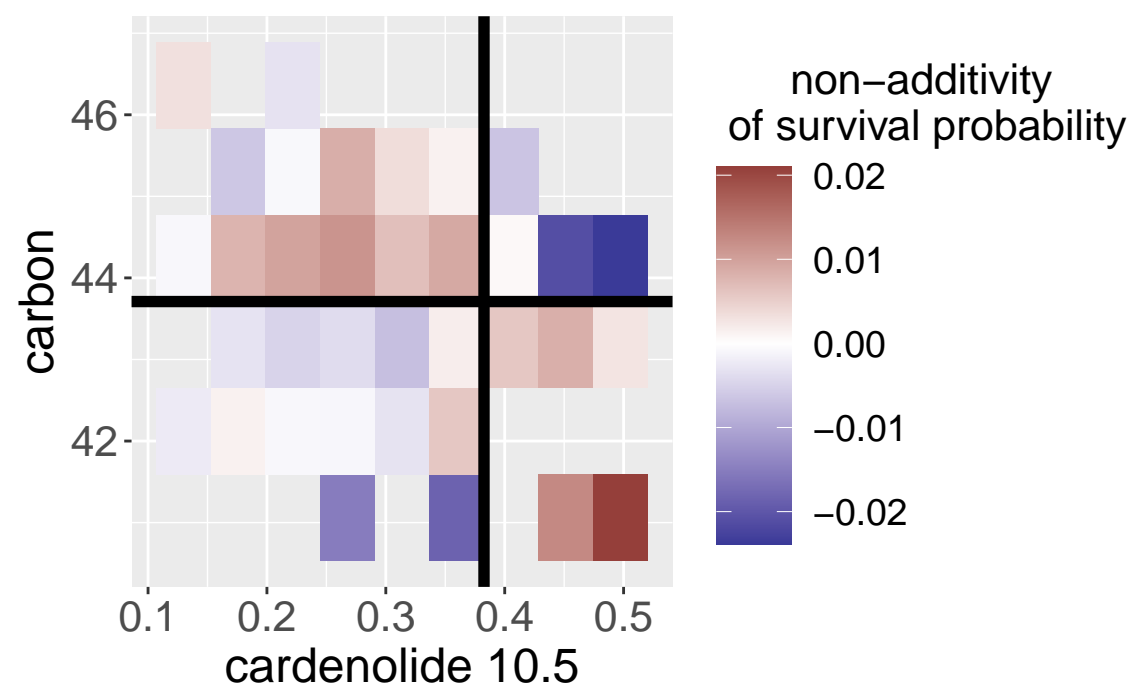

**(bo)**

Monarch Survival

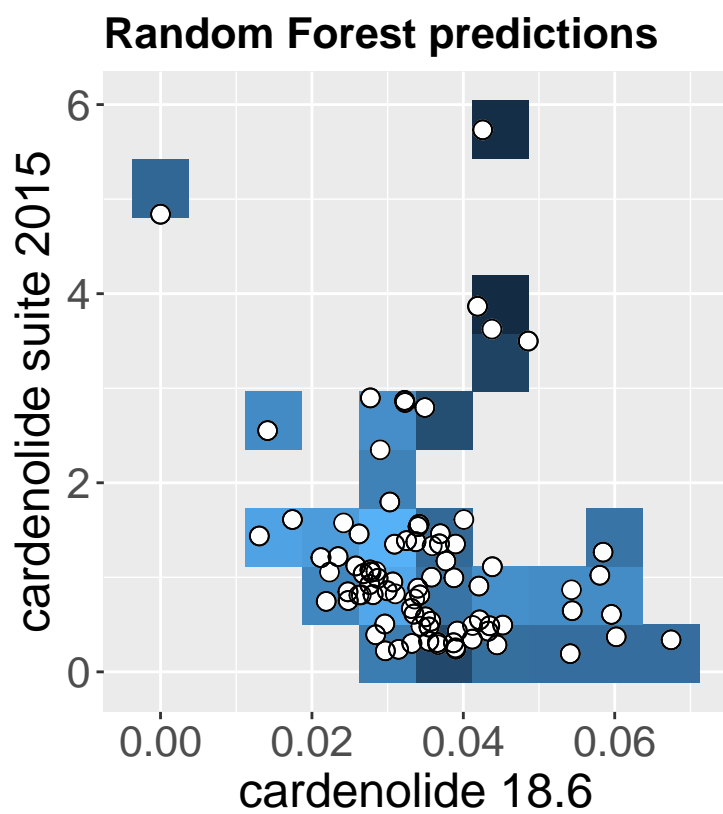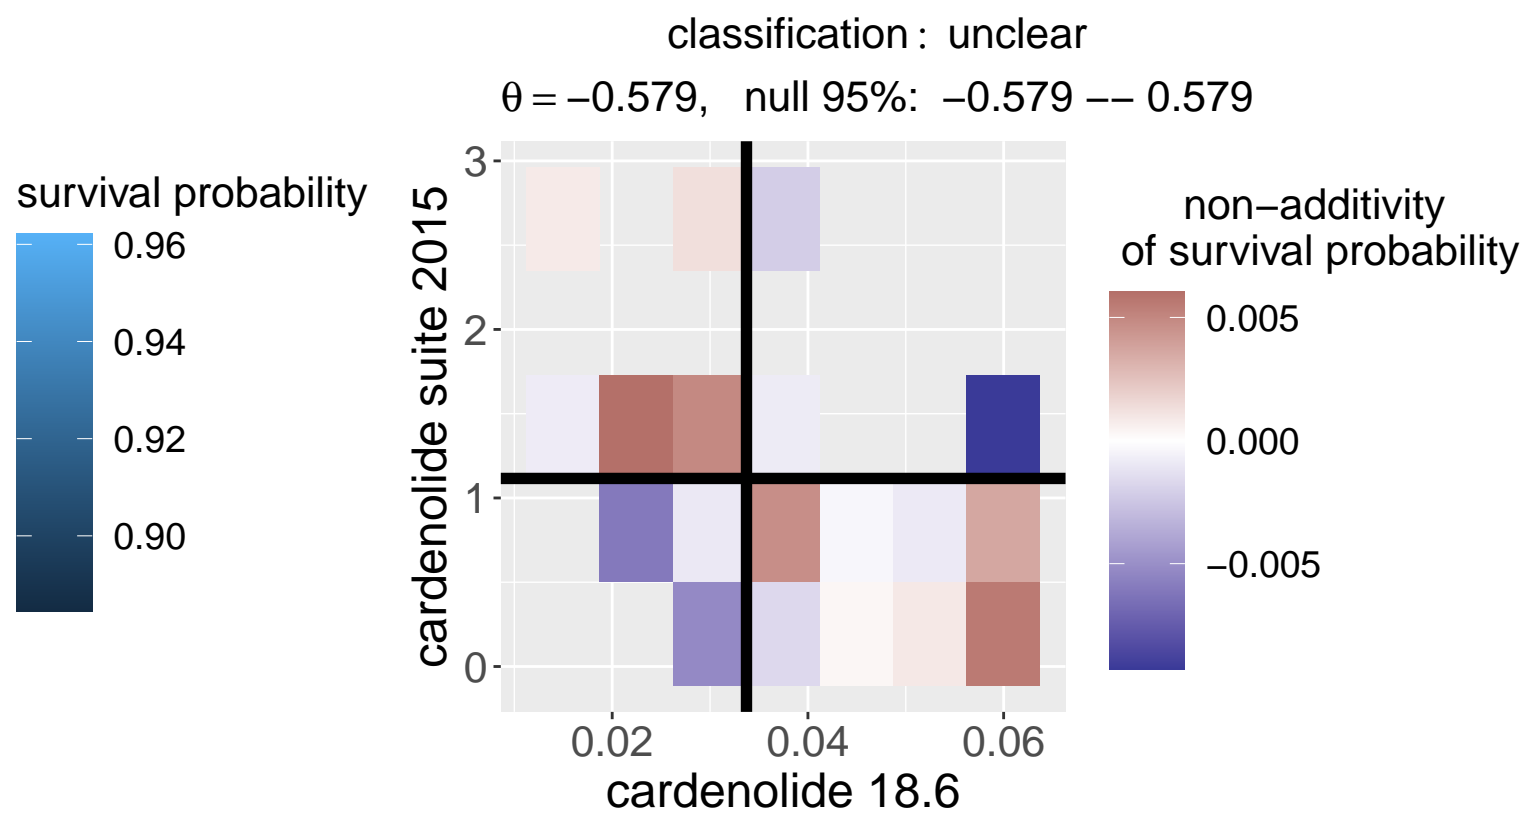**(bp)**

Monarch Survival

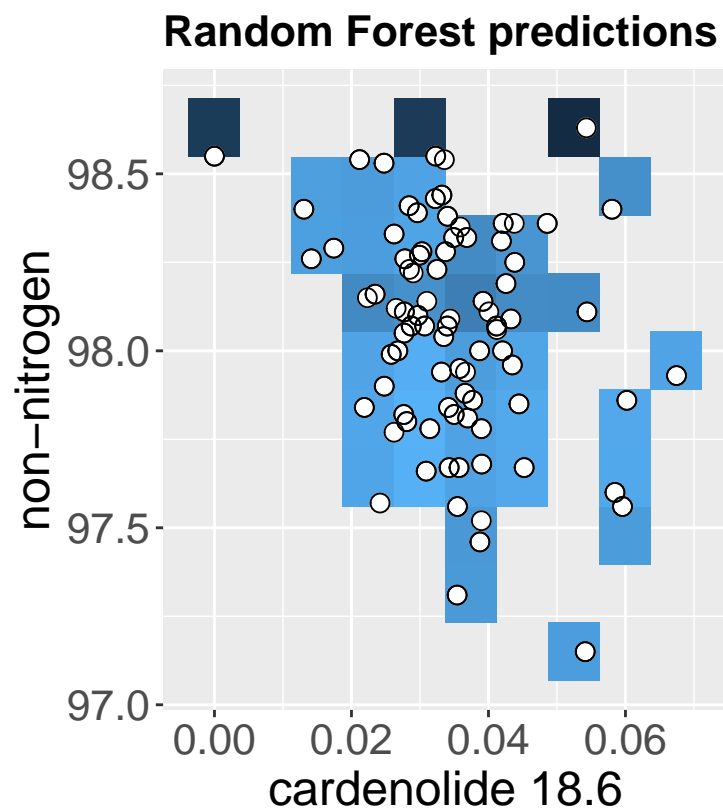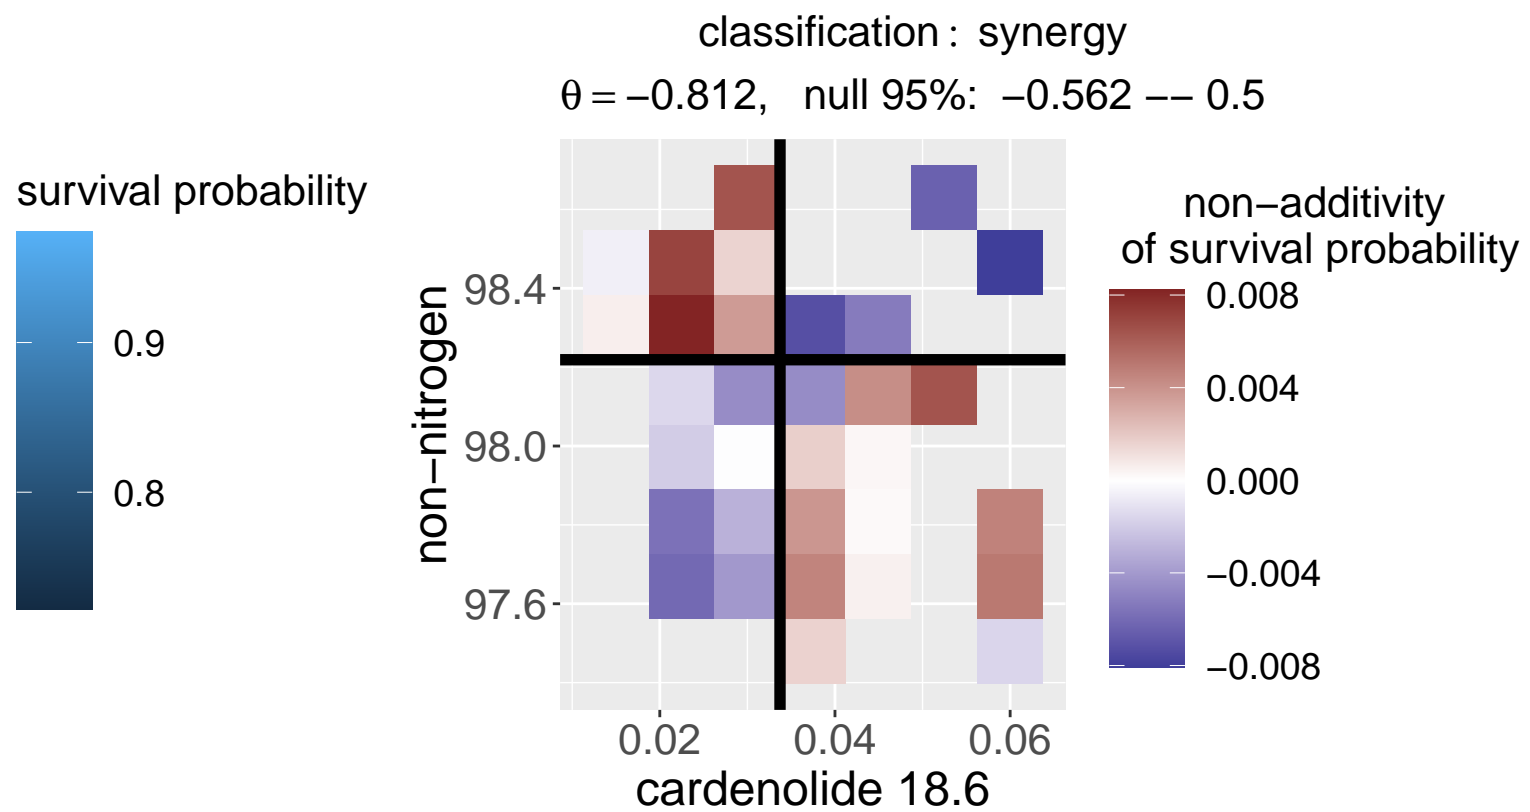**(bq)**

Monarch Survival

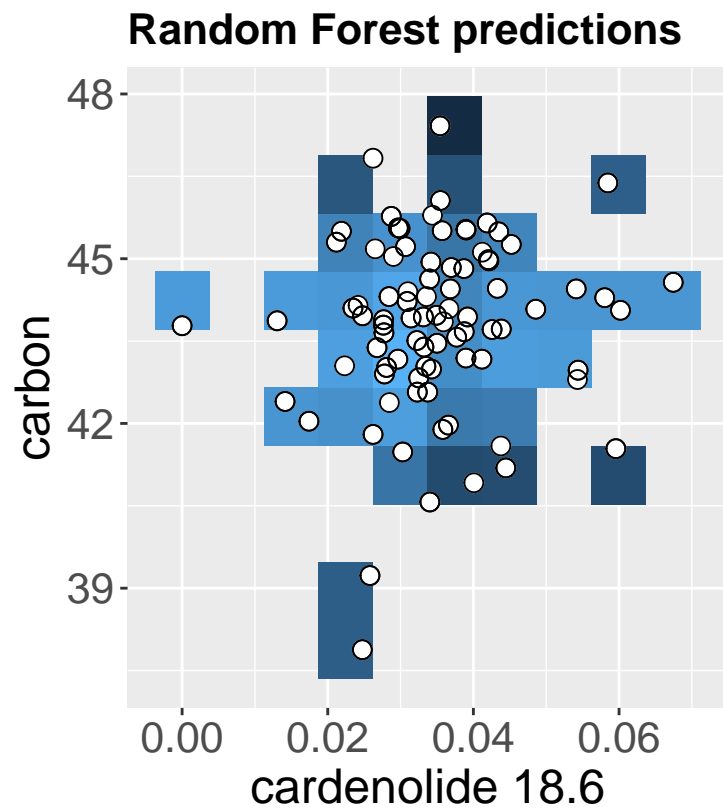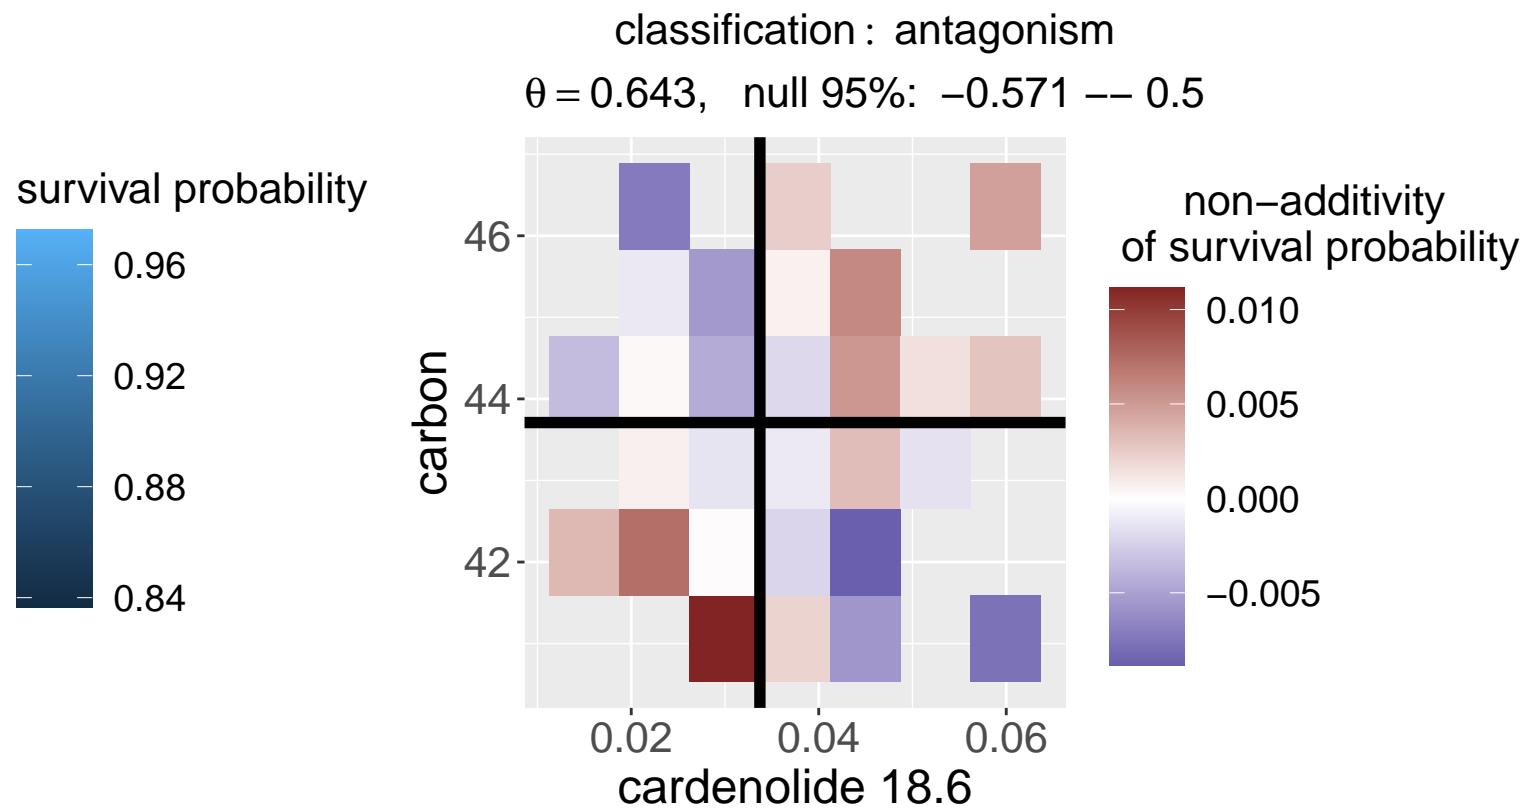

**(br)**

## Monarch Survival

## Random Forest predictions

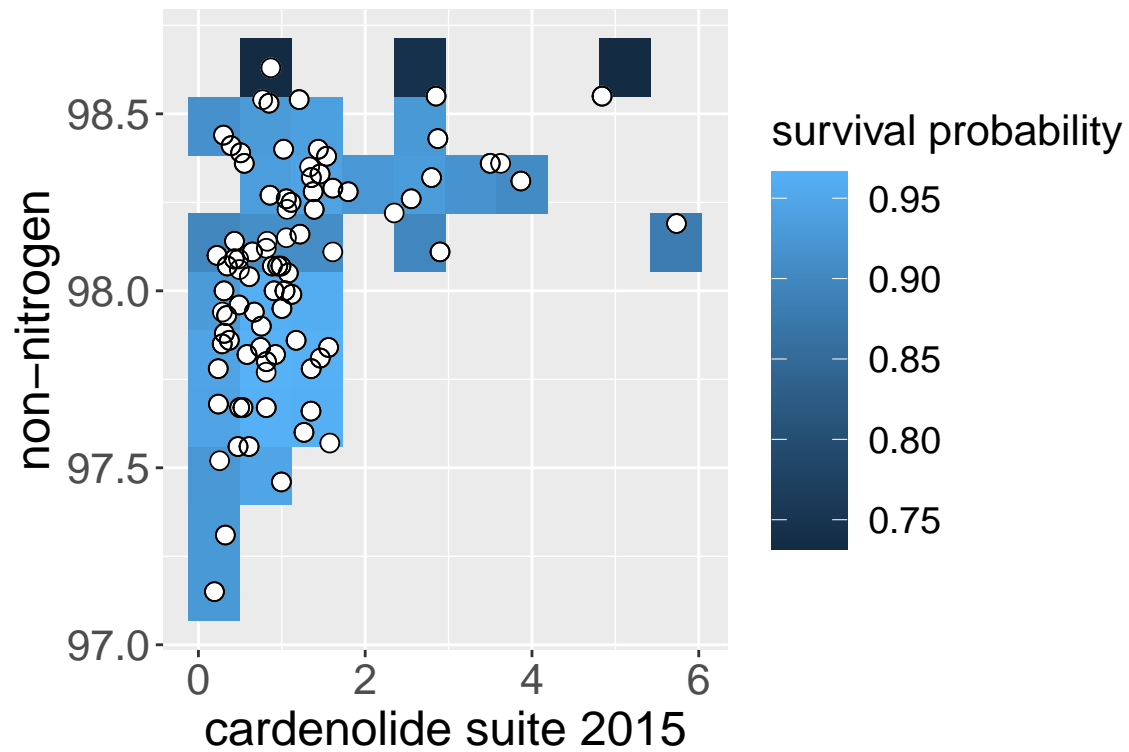

classification : unclear

 $\theta = -0.5$ , null 95%:  $-0.583$  --  $0.583$ 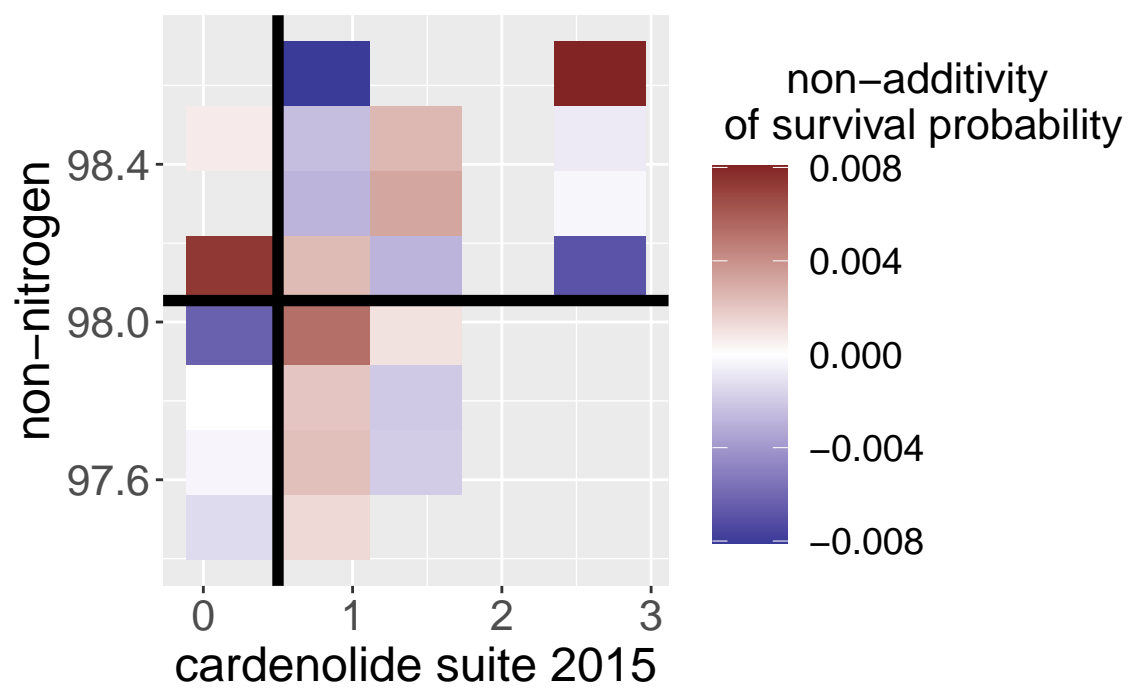**(bs)**

## Monarch Survival

## Random Forest predictions

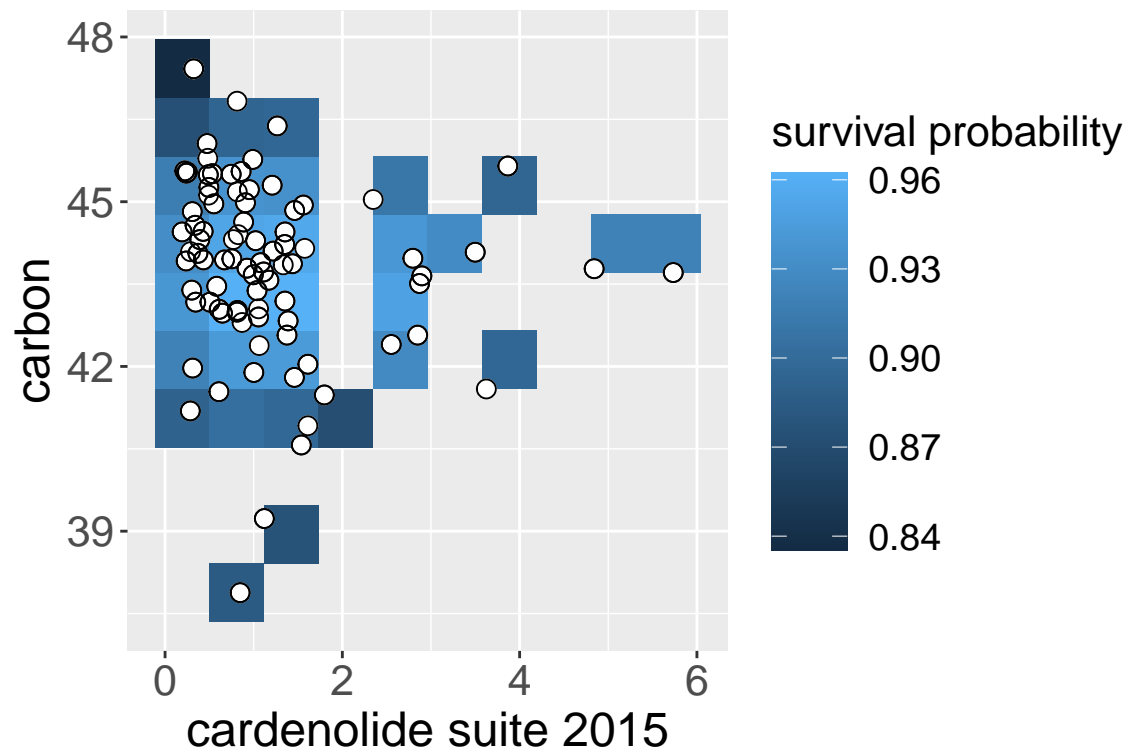

classification : unclear

 $\theta = 0.5$ , null 95%:  $-0.583$  --  $0.583$ 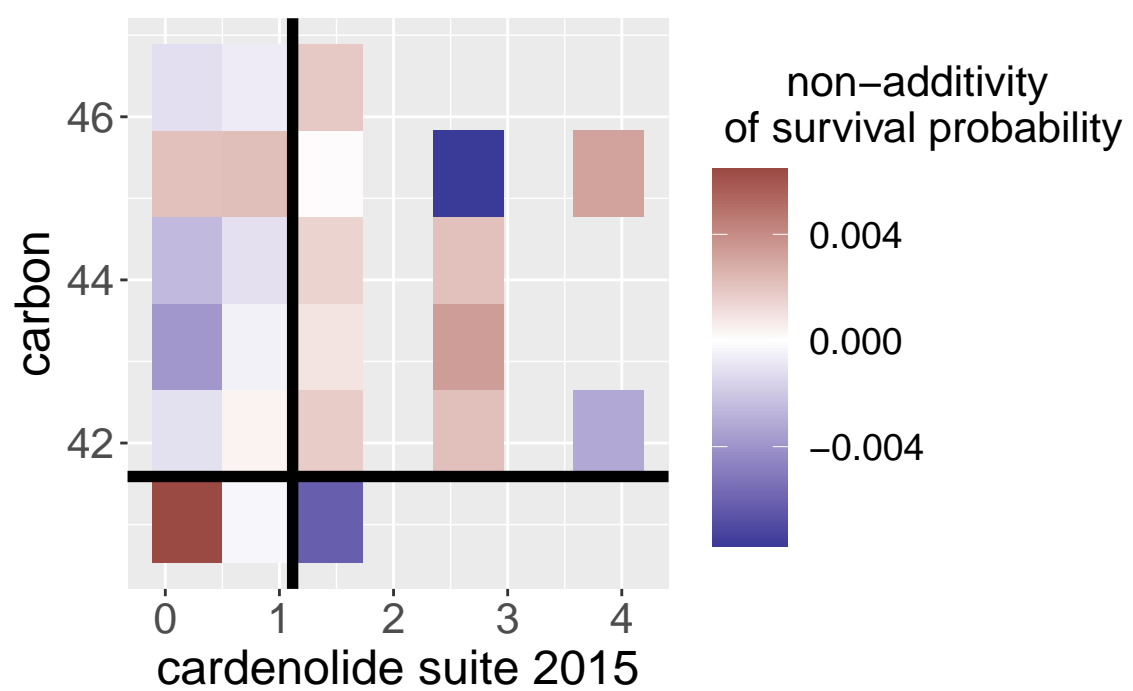**(bt)**

## Monarch Survival

## Random Forest predictions

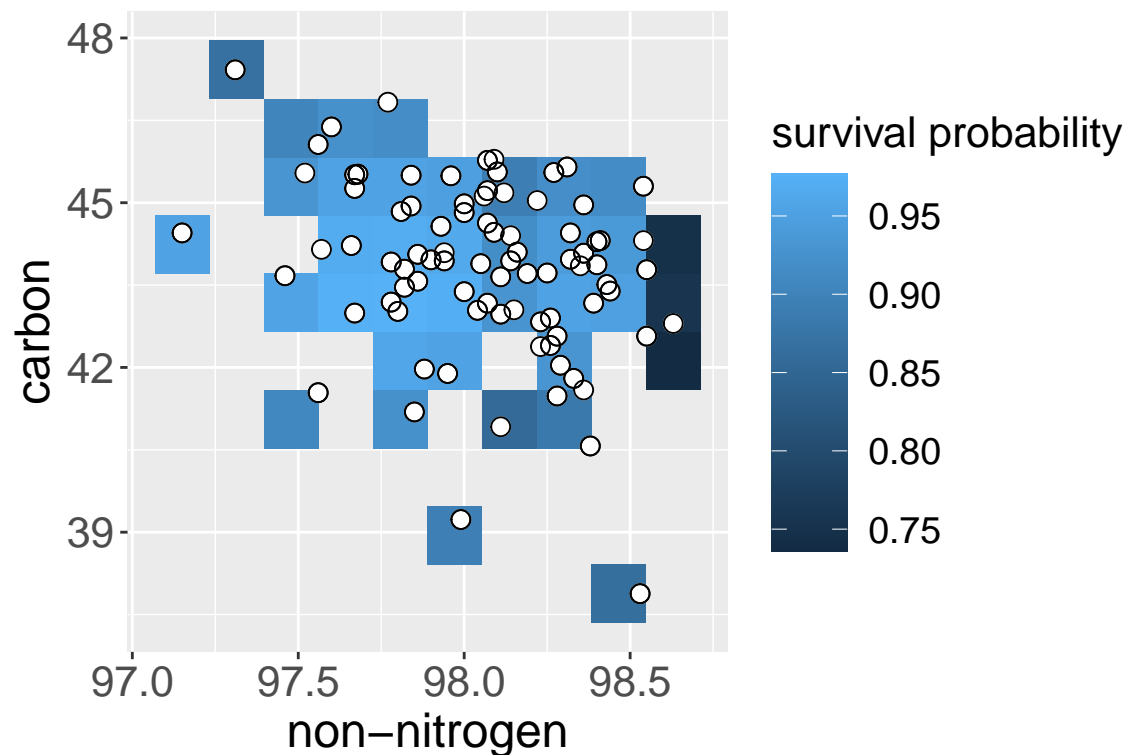

classification : synergy

 $\theta = -0.576$ , null 95%:  $-0.455$  --  $0.455$ 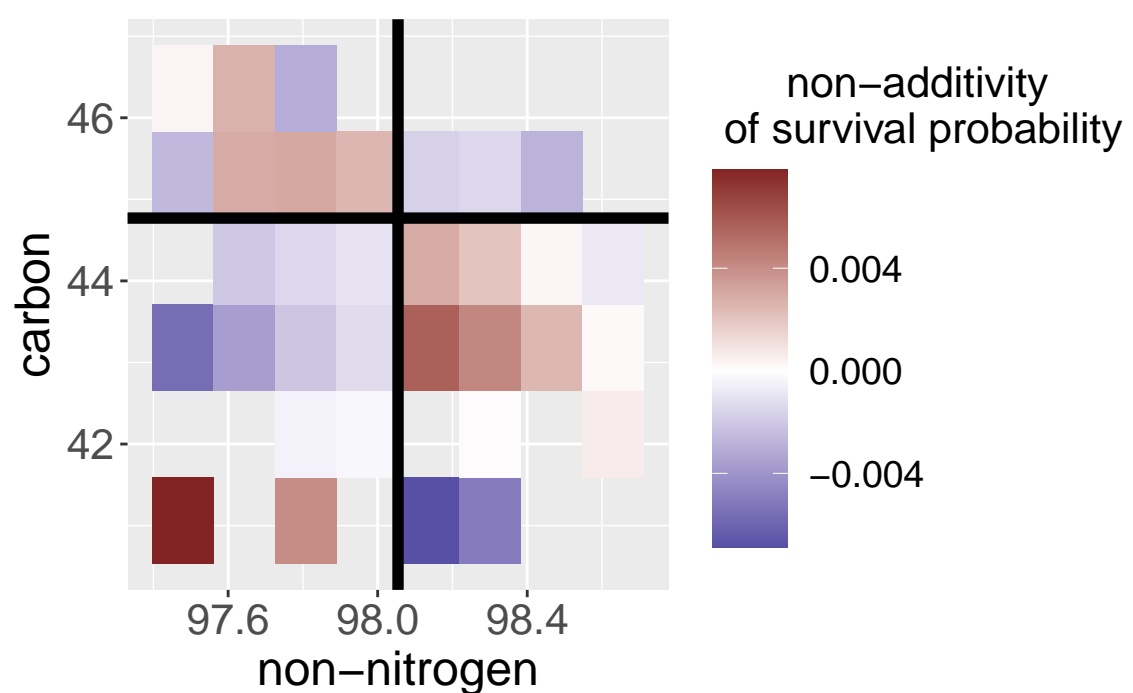



(bu)

Random Forest predictions

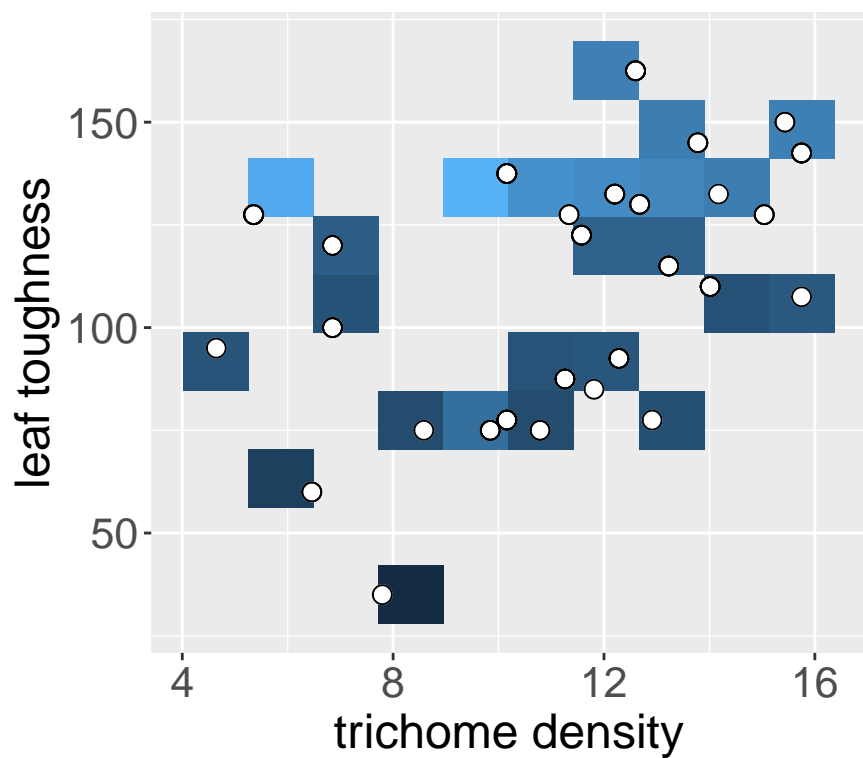

Beetle Growth

classification : unclear  
 $\theta = -0.667$ , null 95%:  $-0.667$  --  $0.667$

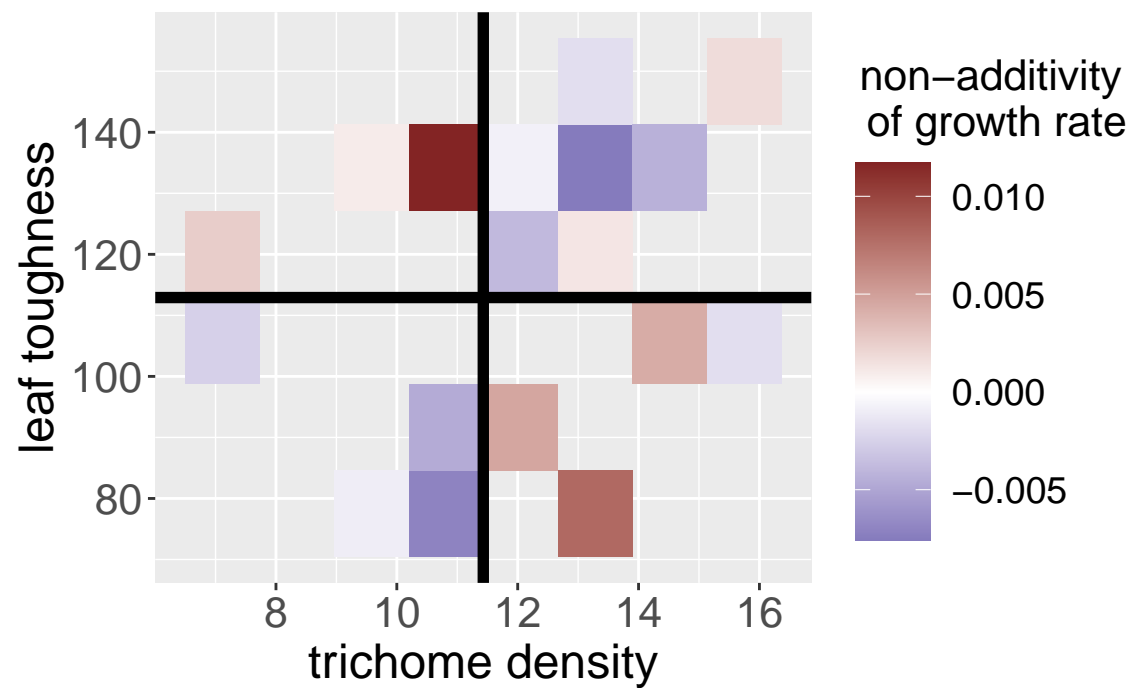

(bv)

Random Forest predictions

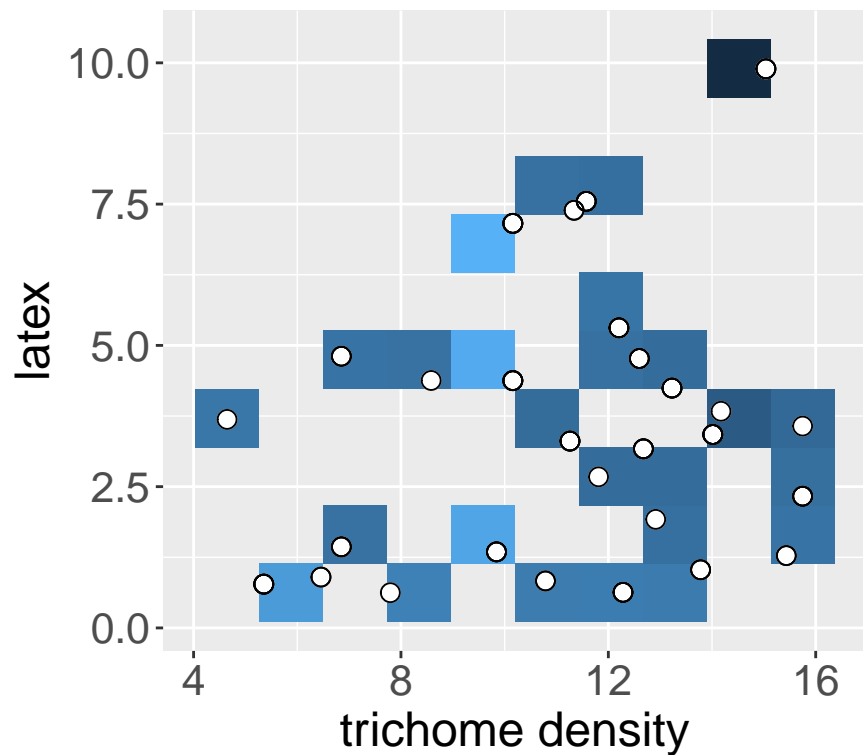

Beetle Growth

classification : unclear  
 $\theta = -0.5$ , null 95%:  $-0.7$  --  $0.7$

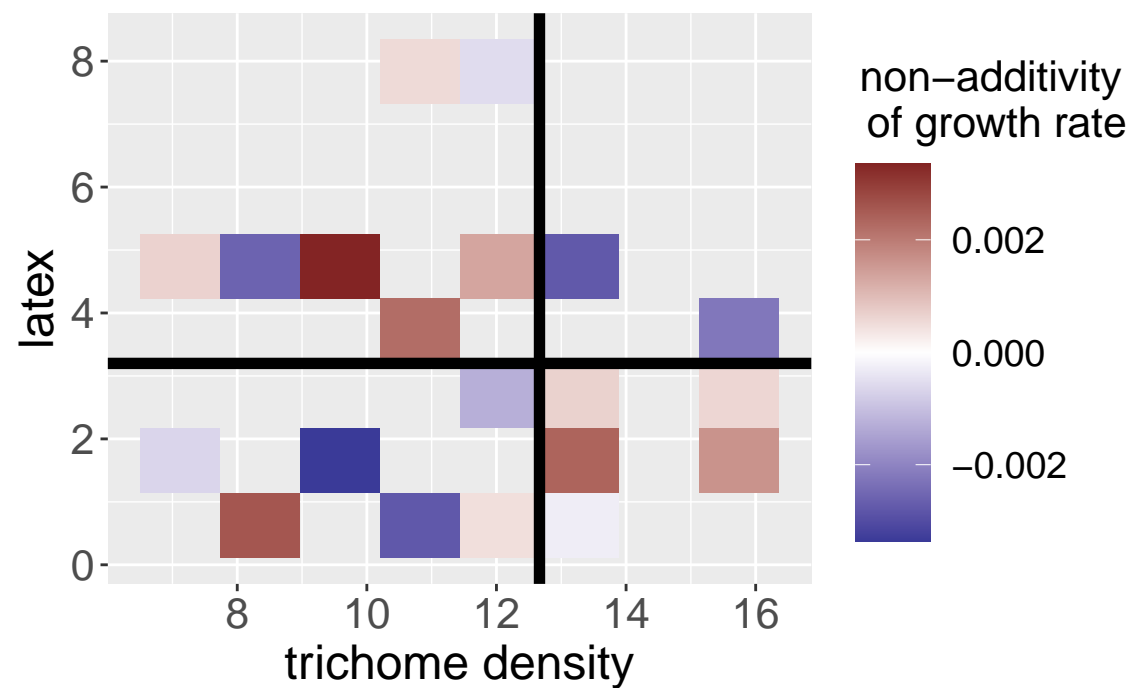

(bw)

Random Forest predictions

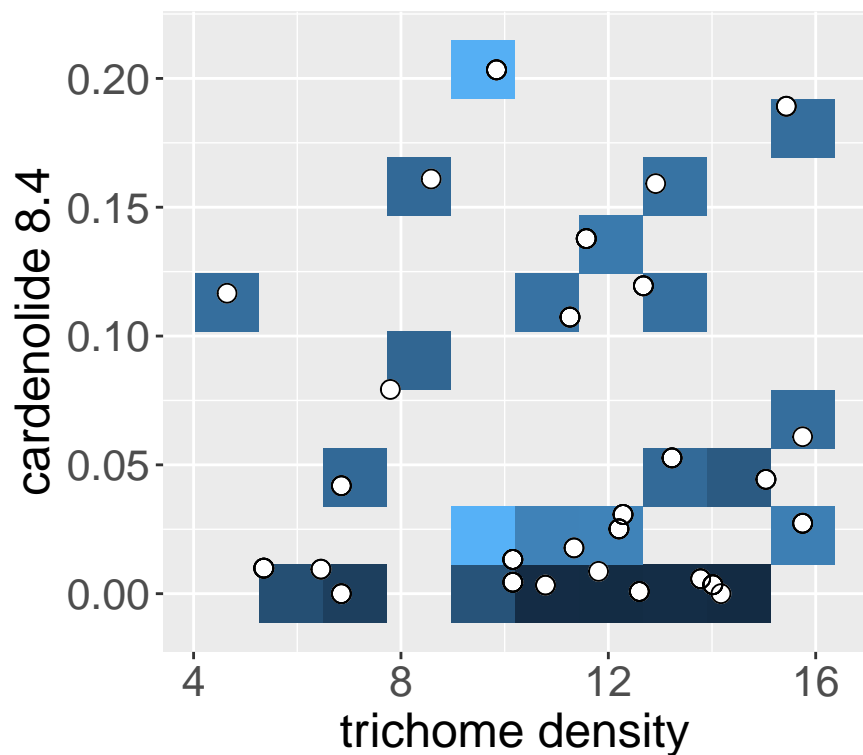

Beetle Growth

classification : unclear  
 $\theta = -0.429$ , null 95%:  $-0.857$  --  $0.857$

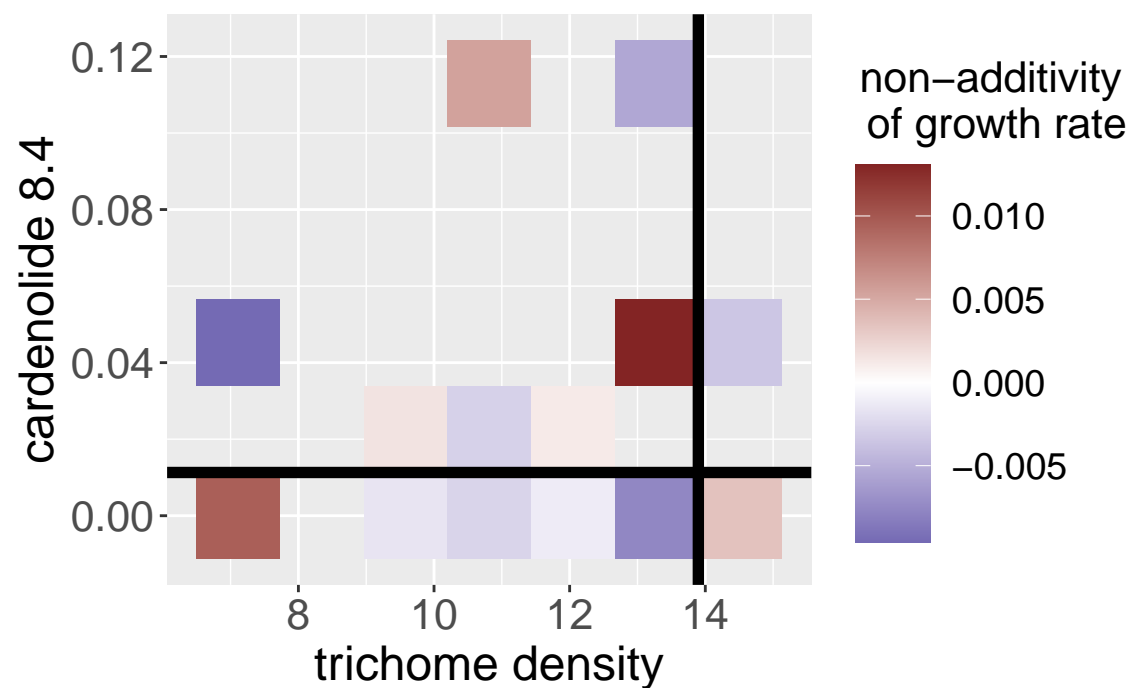

**(bx)****Random Forest predictions**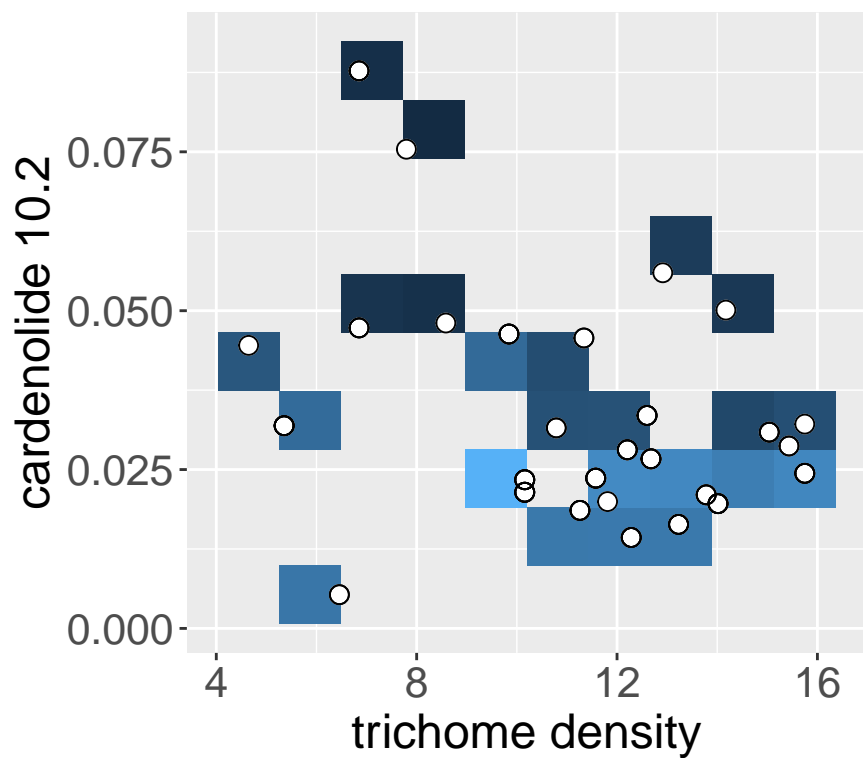**Beetle Growth**

classification : unclear

 $\theta = 0.571$ , null 95%: -0.571 -- 0.571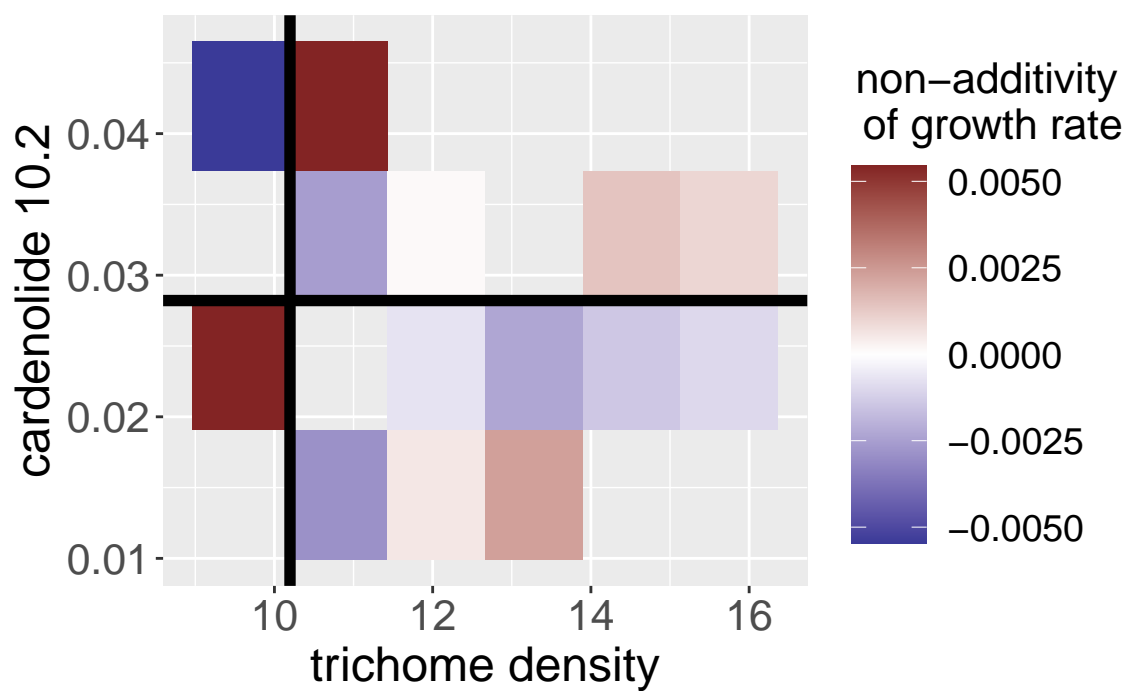**(by)****Random Forest predictions**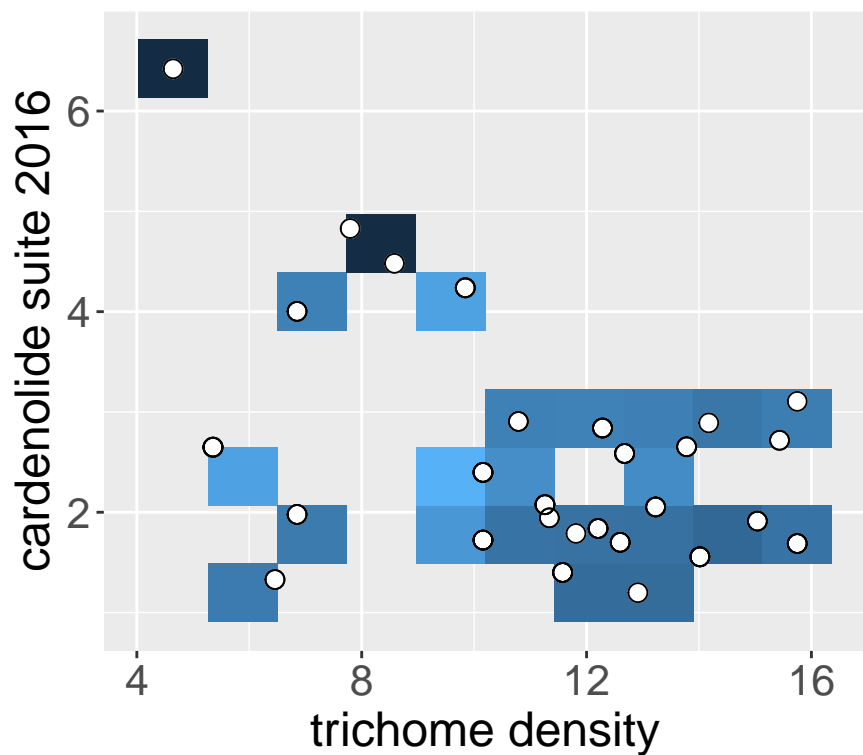**Beetle Growth**

classification : unclear

 $\theta = 0.333$ , null 95%: -0.619 -- 0.619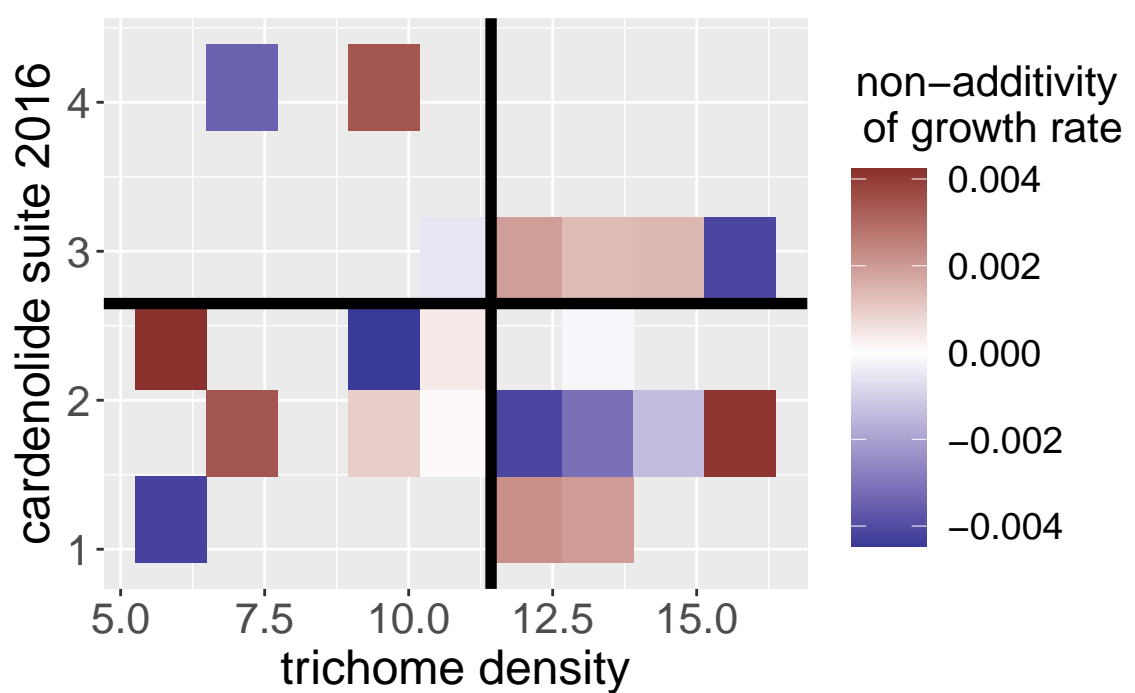**(bz)****Random Forest predictions**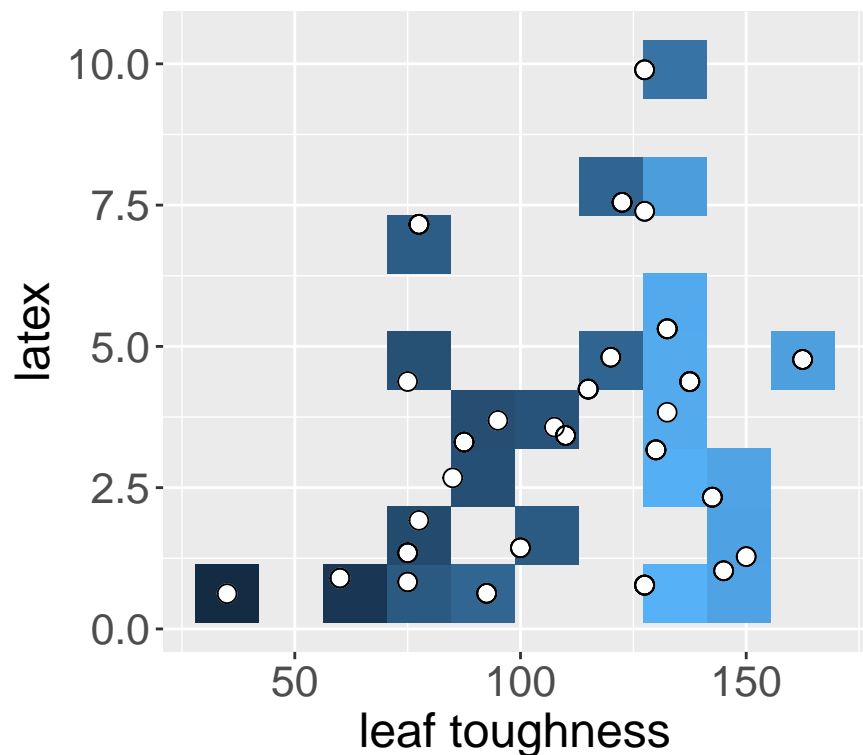**Beetle Growth**

classification : unclear

 $\theta = 0.556$ , null 95%: -0.667 -- 0.667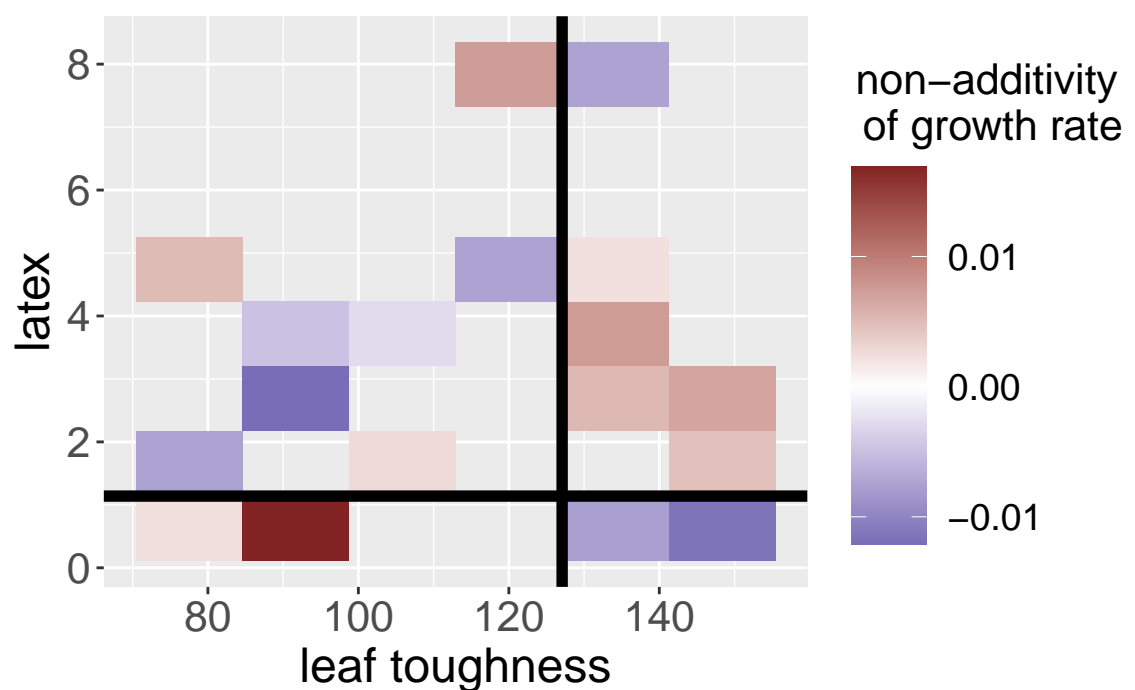

**(ca)****Beetle Growth****Random Forest predictions**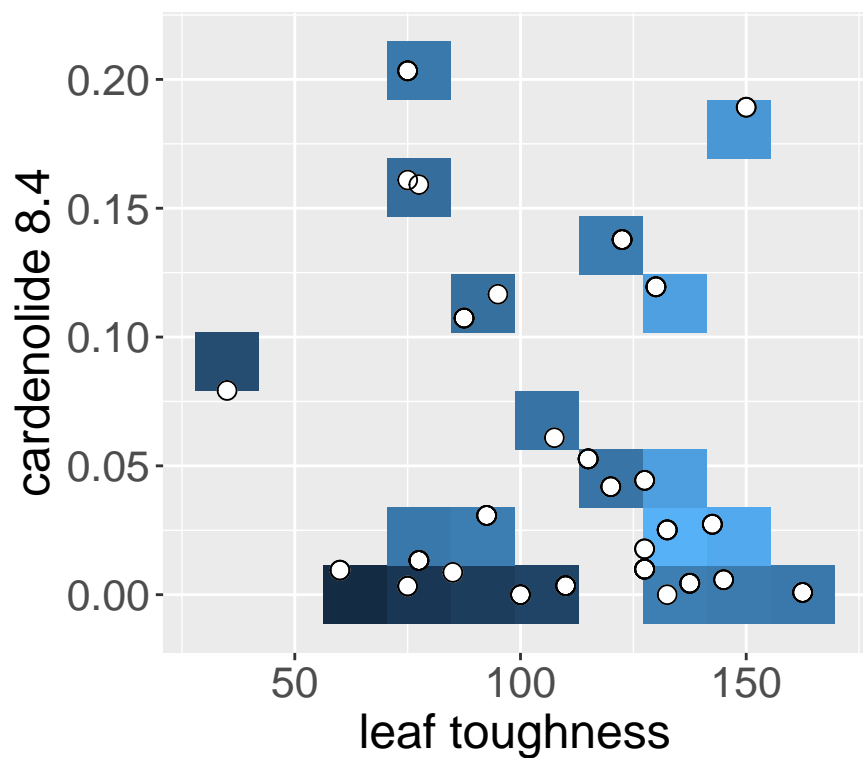

growth rate

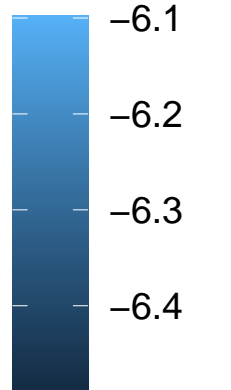

classification : unclear

 $\theta = -1$ , null 95%: -1 -- 1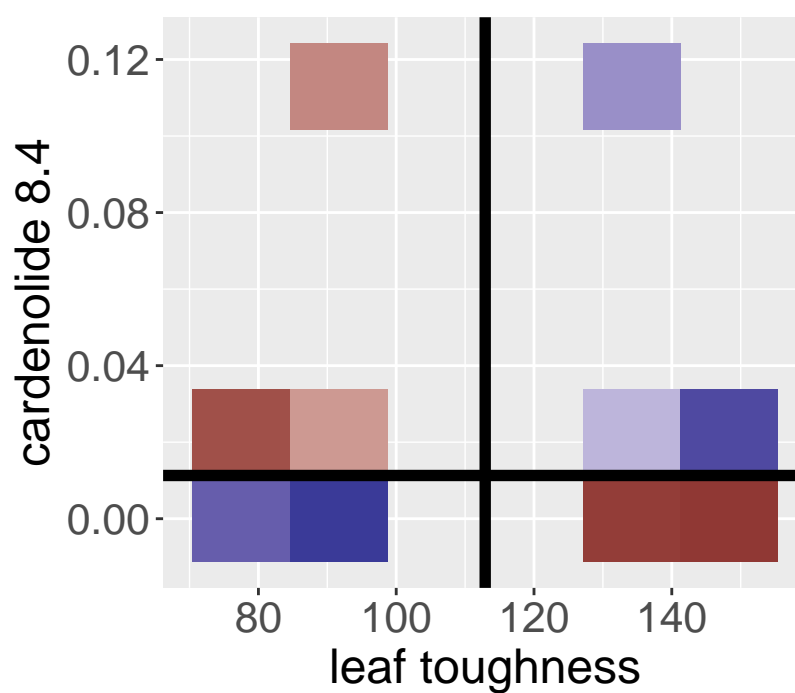

non-additivity of growth rate

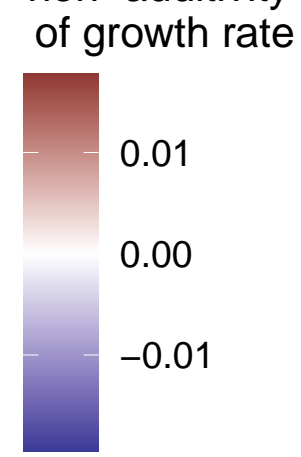**(cb)****Beetle Growth****Random Forest predictions**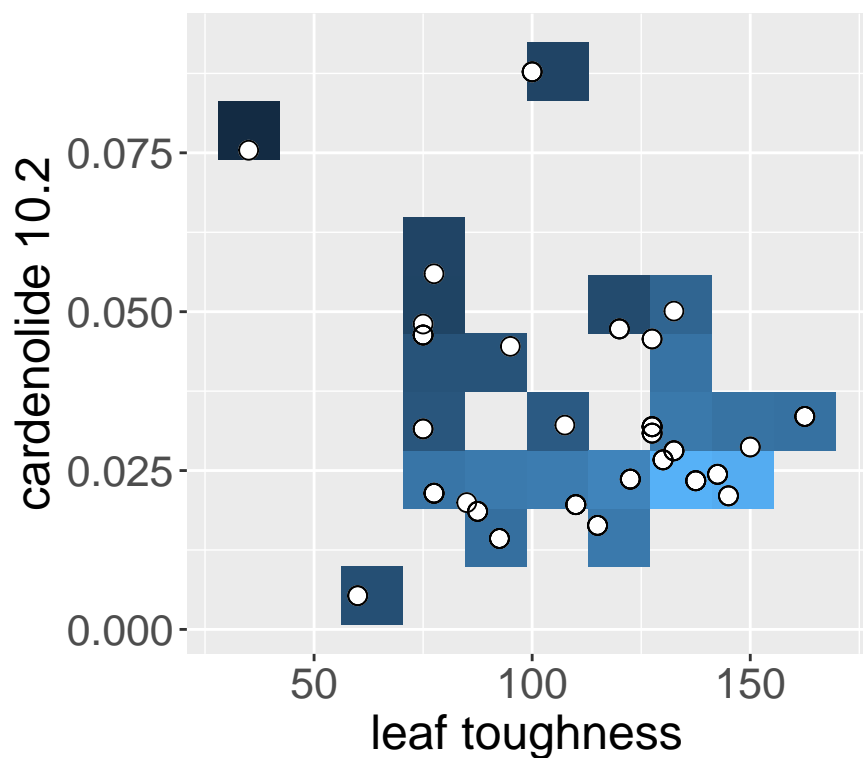

growth rate

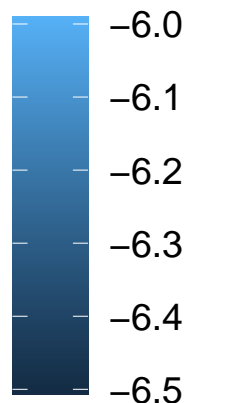

classification : synergy

 $\theta = -0.889$ , null 95%: -0.667 -- 0.667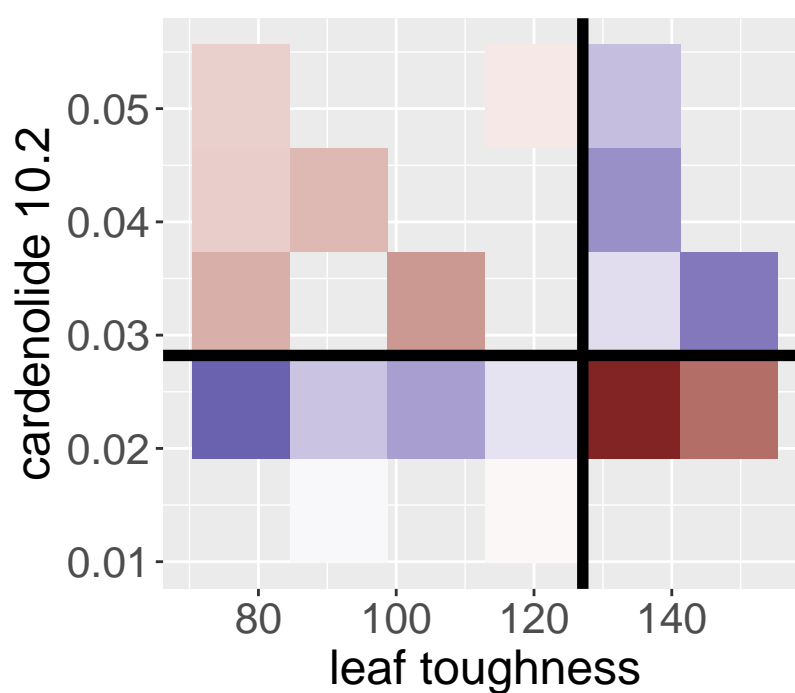

non-additivity of growth rate

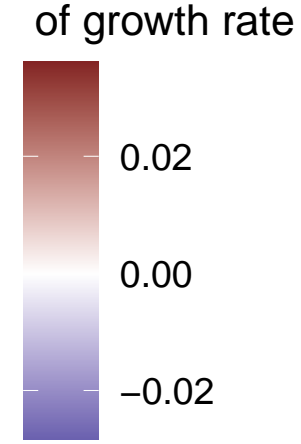**(cc)****Beetle Growth****Random Forest predictions**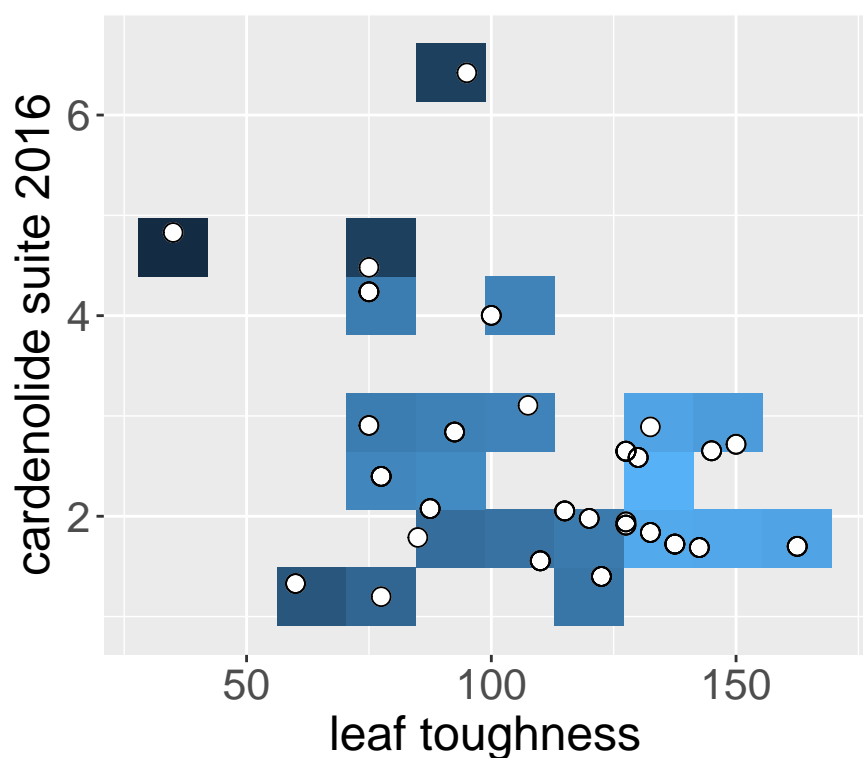

growth rate

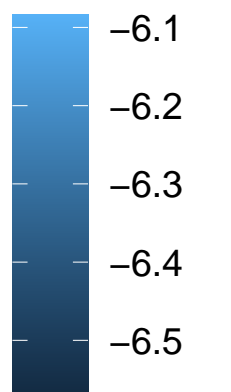

classification : synergy

 $\theta = -0.765$ , null 95%: -0.647 -- 0.647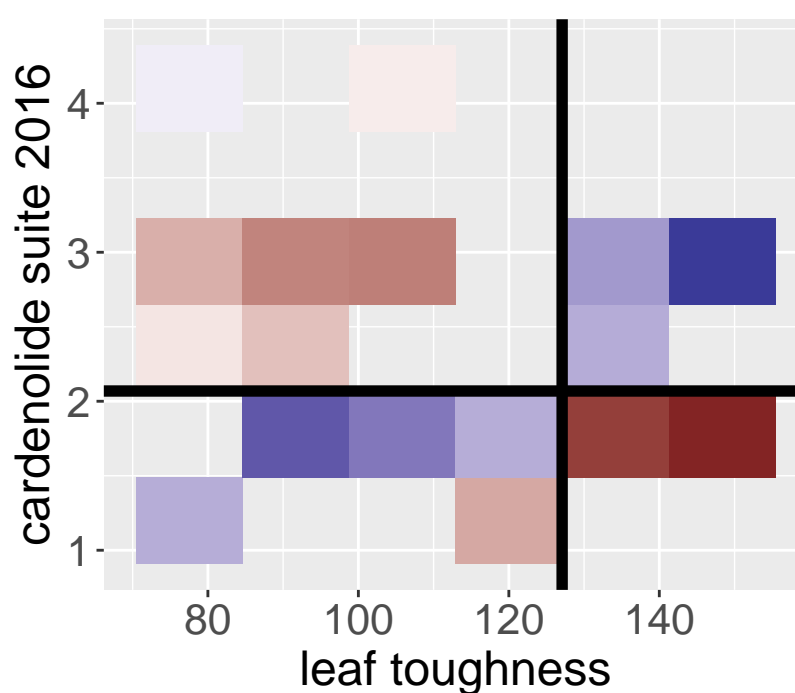

non-additivity of growth rate

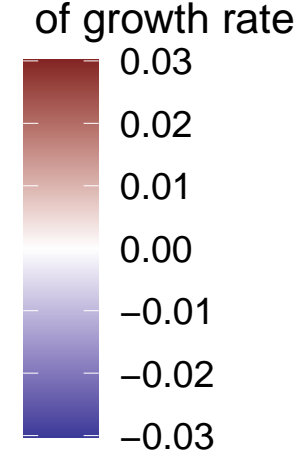

**(cd)****Random Forest predictions**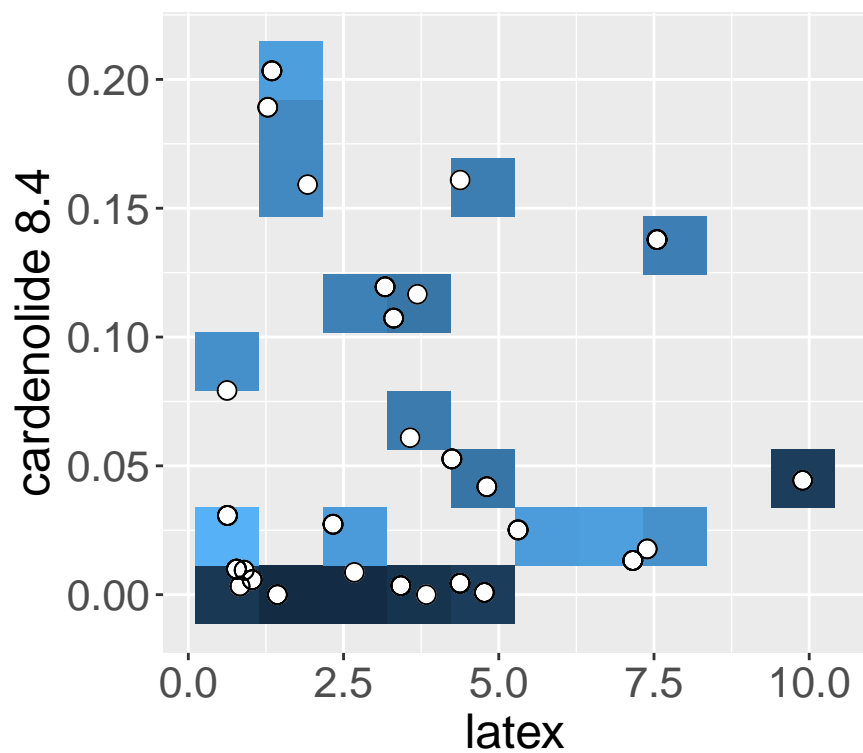**Beetle Growth**

classification : unclear

 $\theta = -0.818$ , null 95%:  $-0.818$  --  $0.818$ 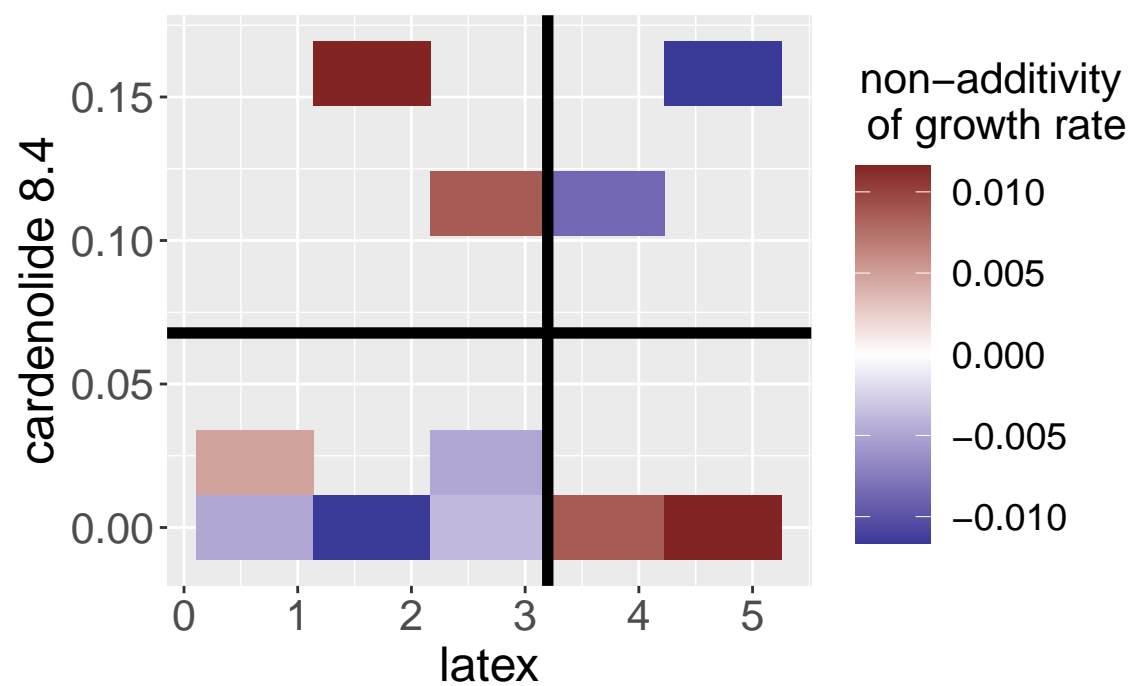**(ce)****Random Forest predictions**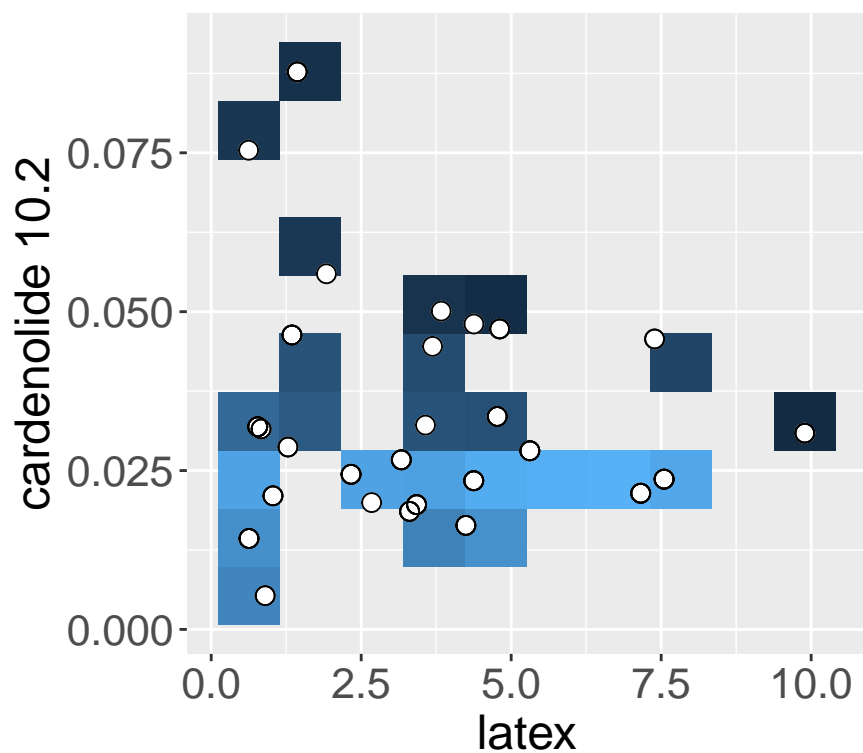**Beetle Growth**

classification : synergy

 $\theta = -0.75$ , null 95%:  $-0.625$  --  $0.625$ 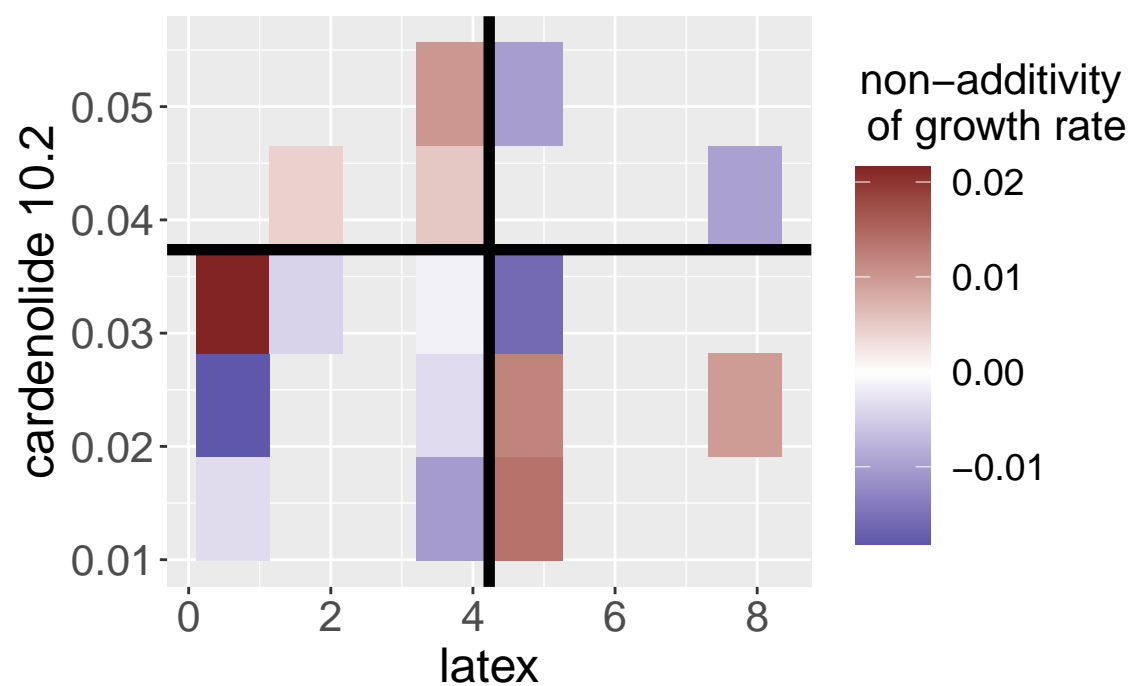**(cf)****Random Forest predictions**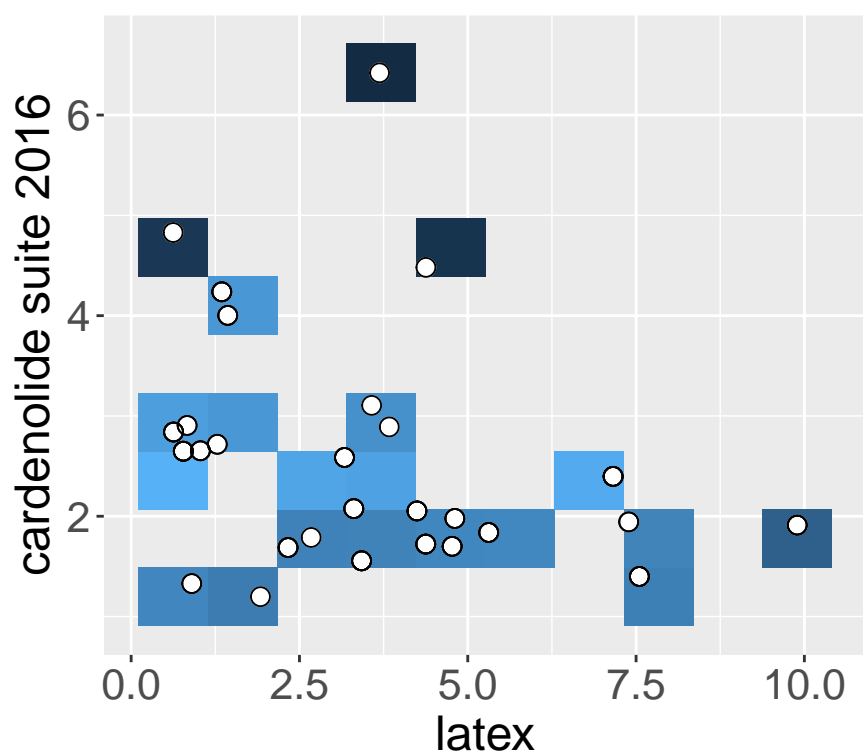**Beetle Growth**

classification : unclear

 $\theta = 0.467$ , null 95%:  $-0.733$  --  $0.733$ 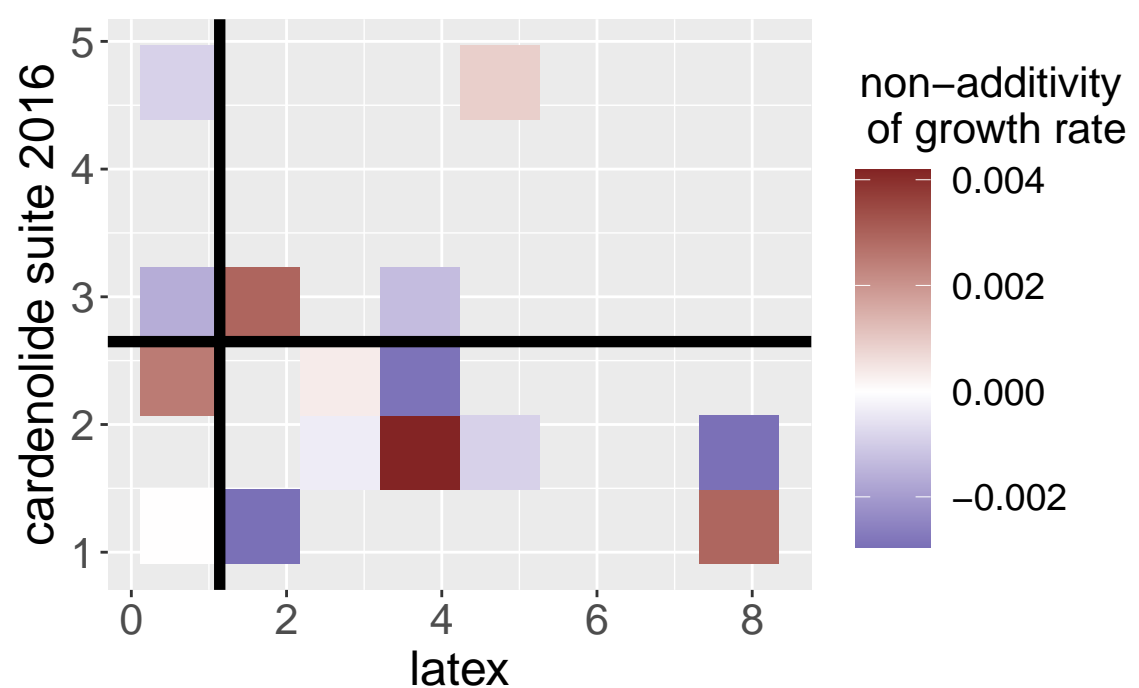

**(cg)****Beetle Growth****Random Forest predictions**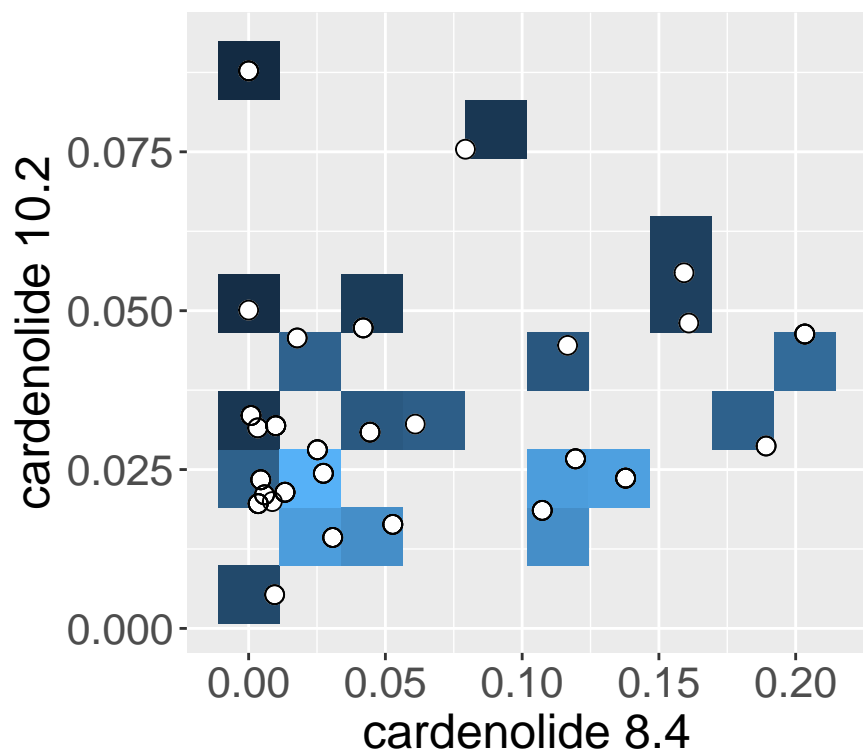

growth rate

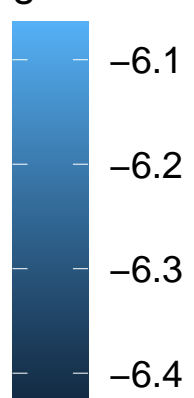

classification : unclear

 $\theta = -0.667$ , null 95%:  $-1$  --  $0.833$ 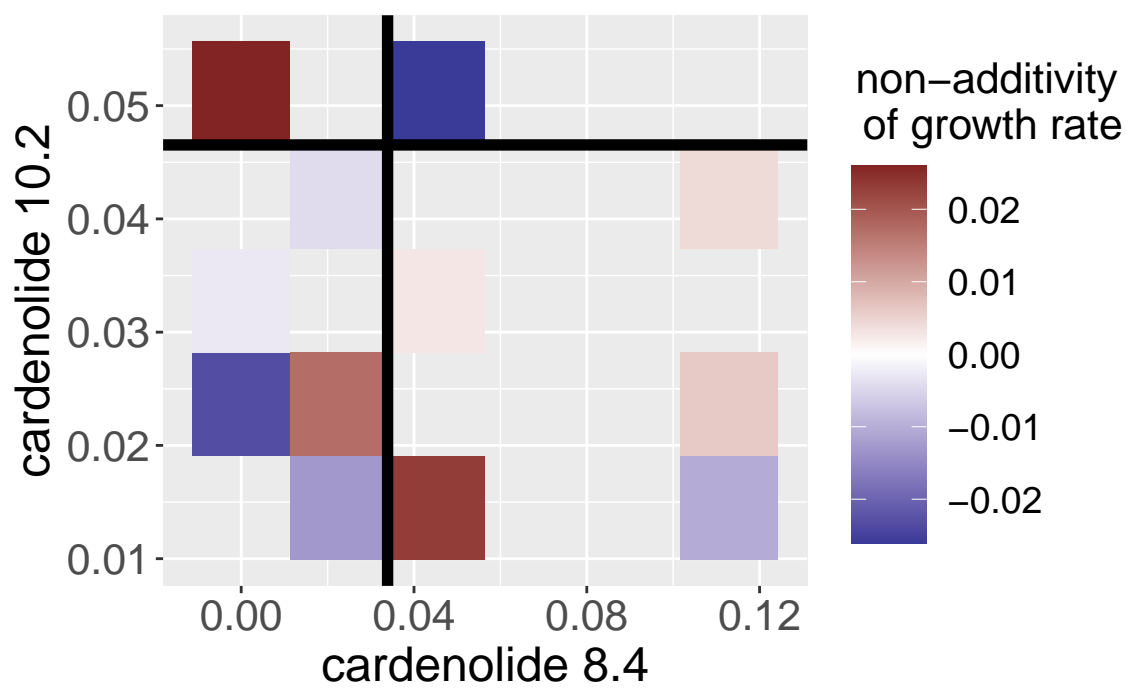non-additivity  
of growth rate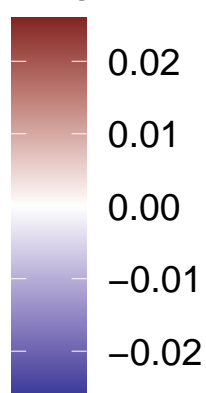**(ch)****Beetle Growth****Random Forest predictions**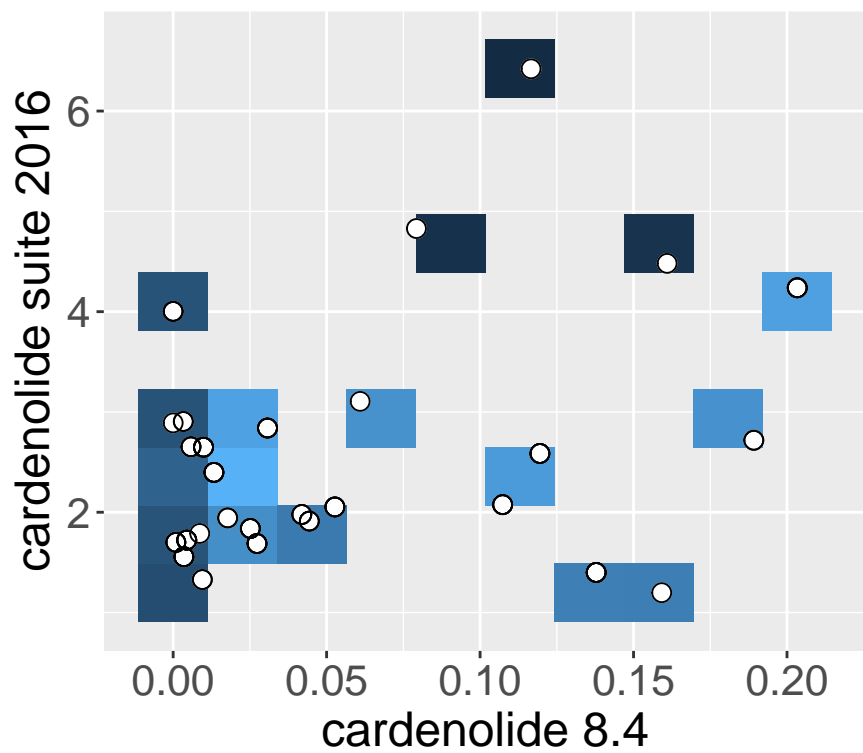

growth rate

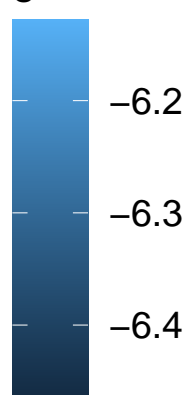

classification : unclear

 $\theta = 1$ , null 95%:  $-1$  --  $1$ 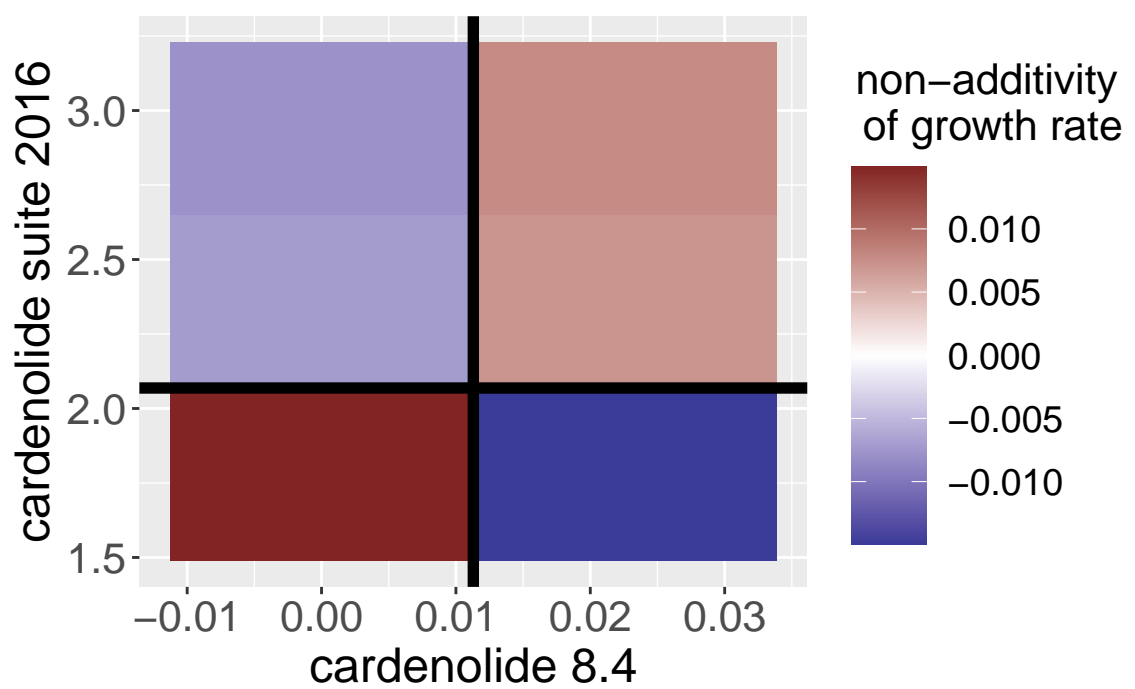non-additivity  
of growth rate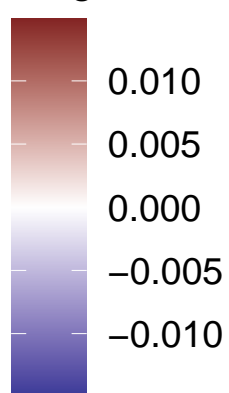**(ci)****Beetle Growth****Random Forest predictions**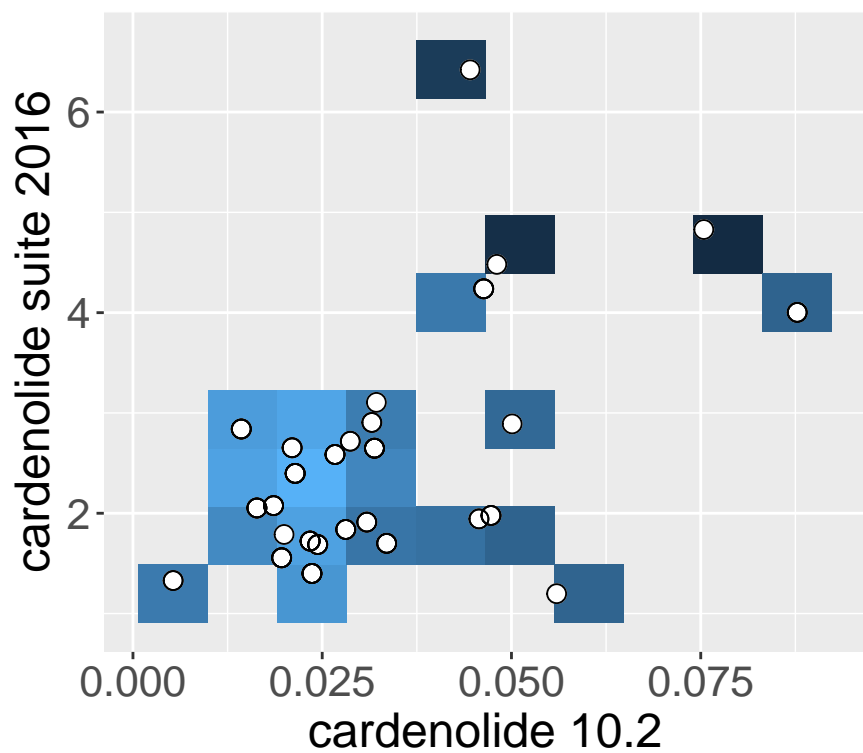

growth rate

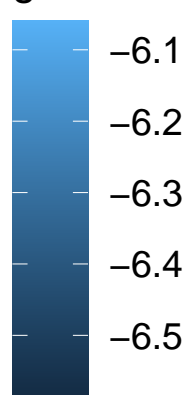

classification : synergy

 $\theta = -1$ , null 95%:  $-0.818$  --  $0.818$ 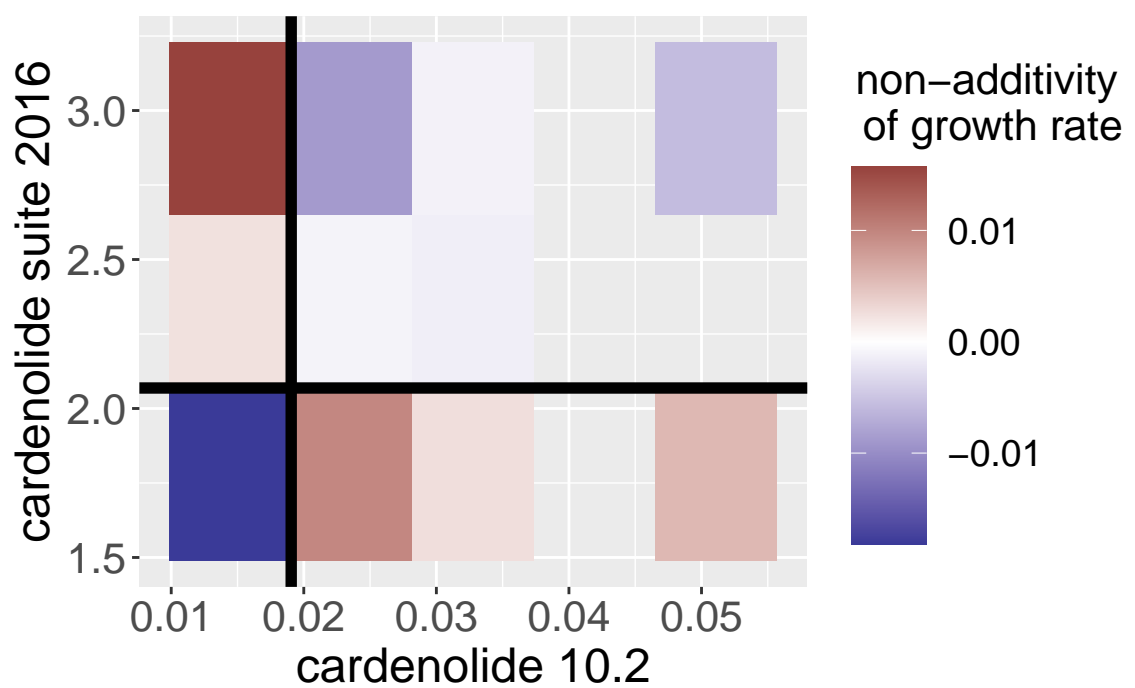non-additivity  
of growth rate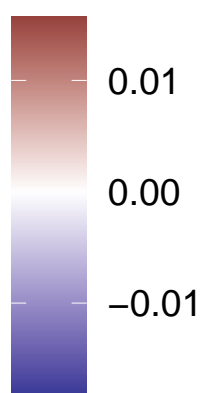

**(cj)**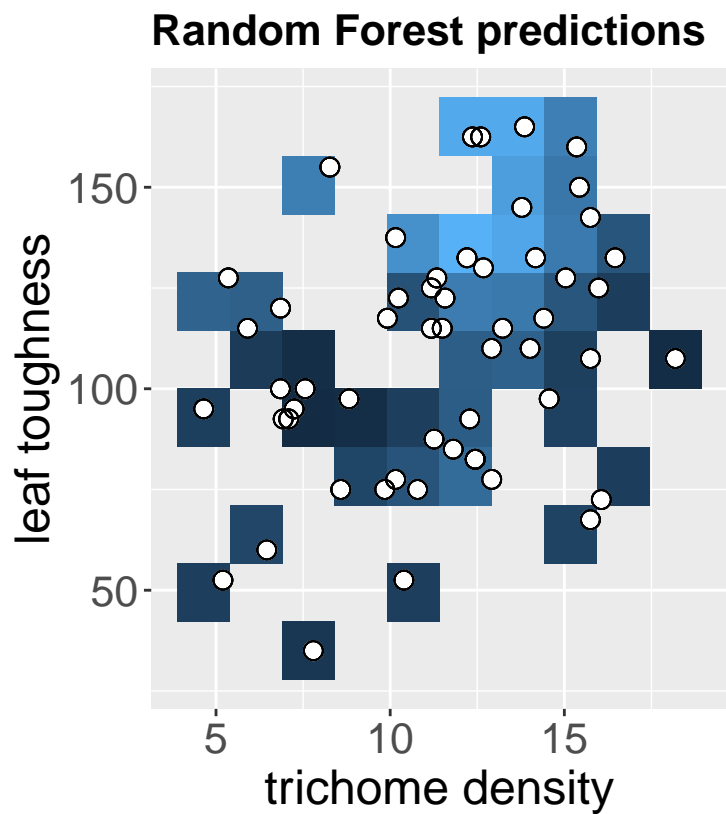**Beetle Survival**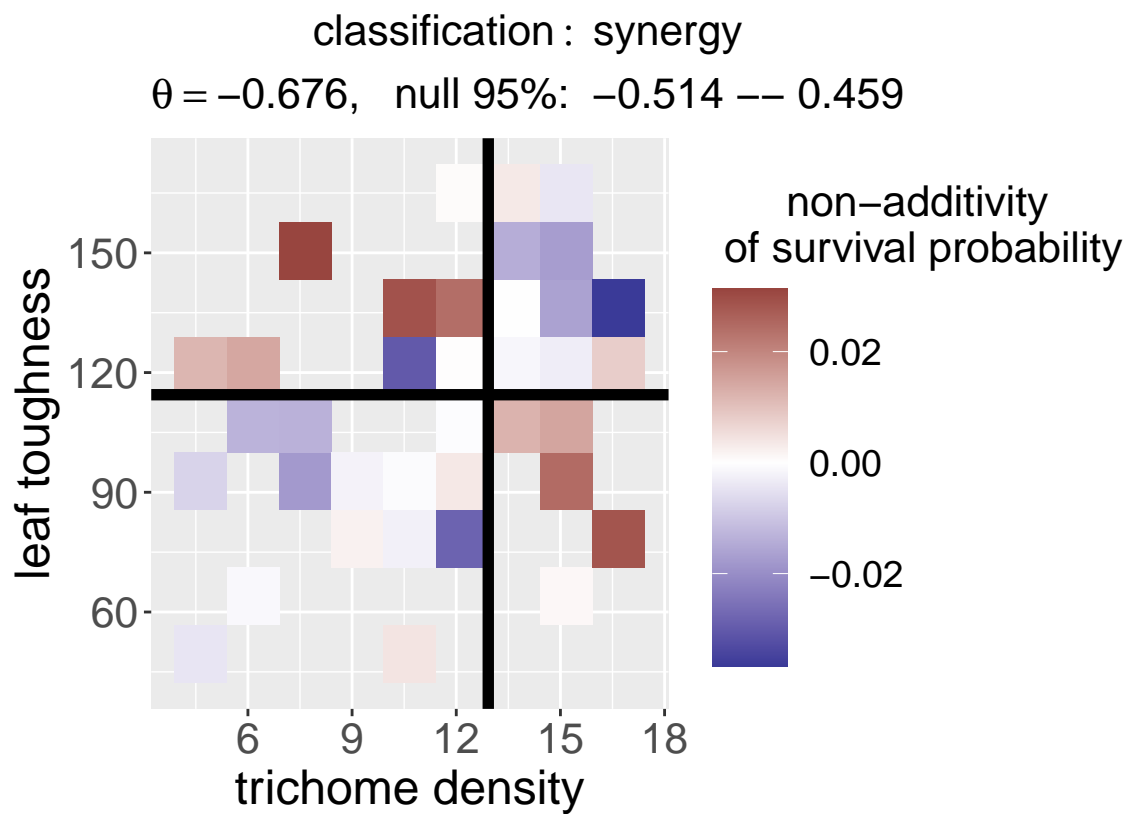**(ck)**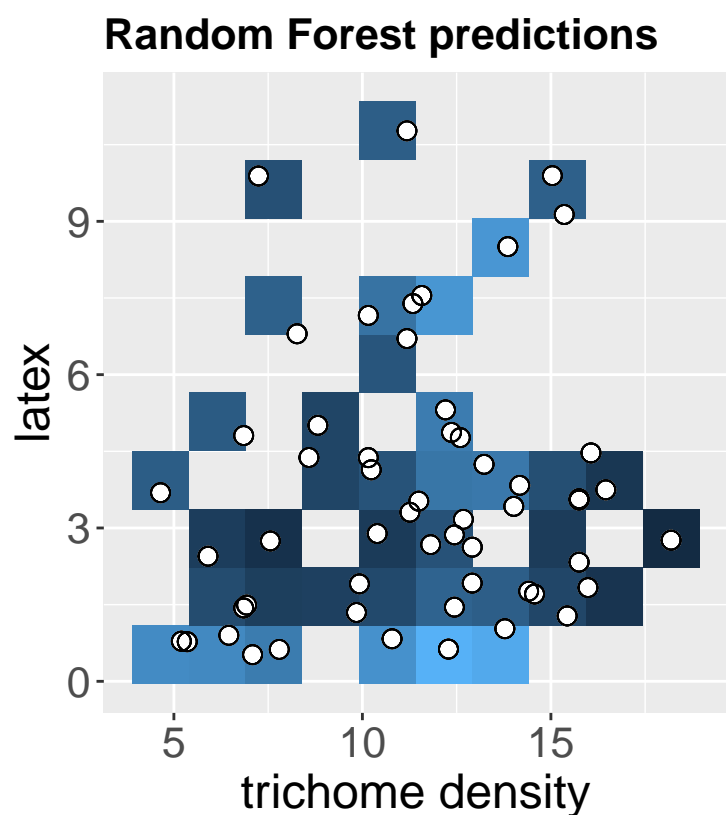**Beetle Survival**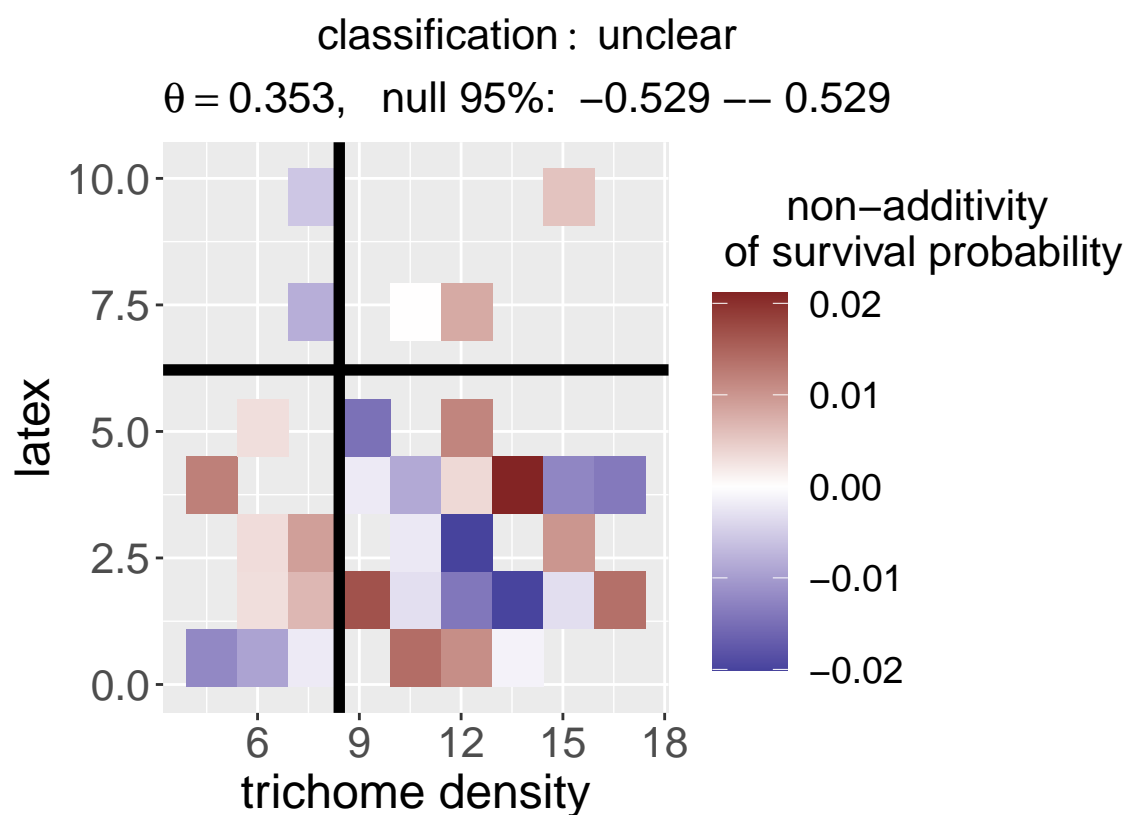**(cl)**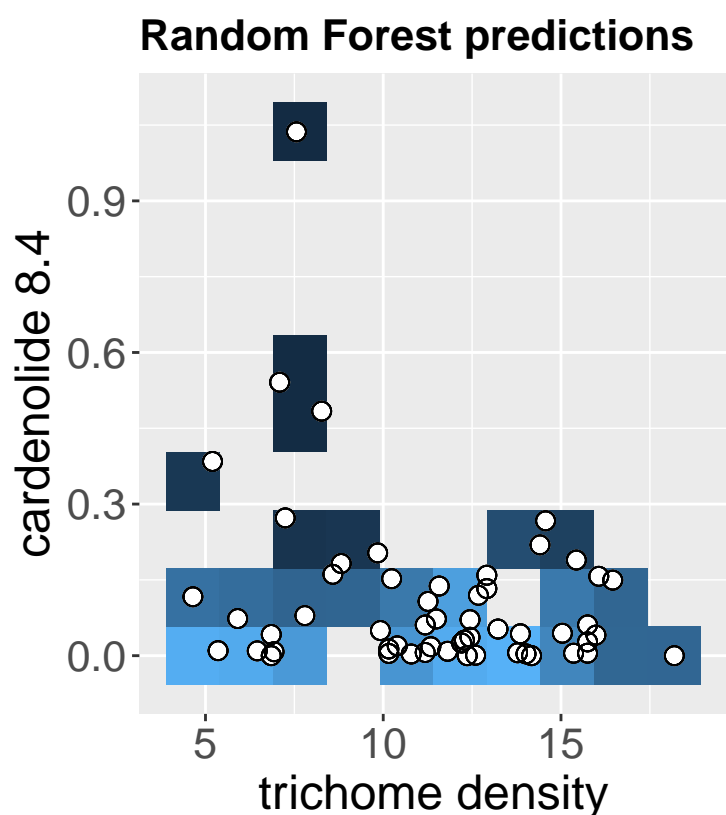**Beetle Survival**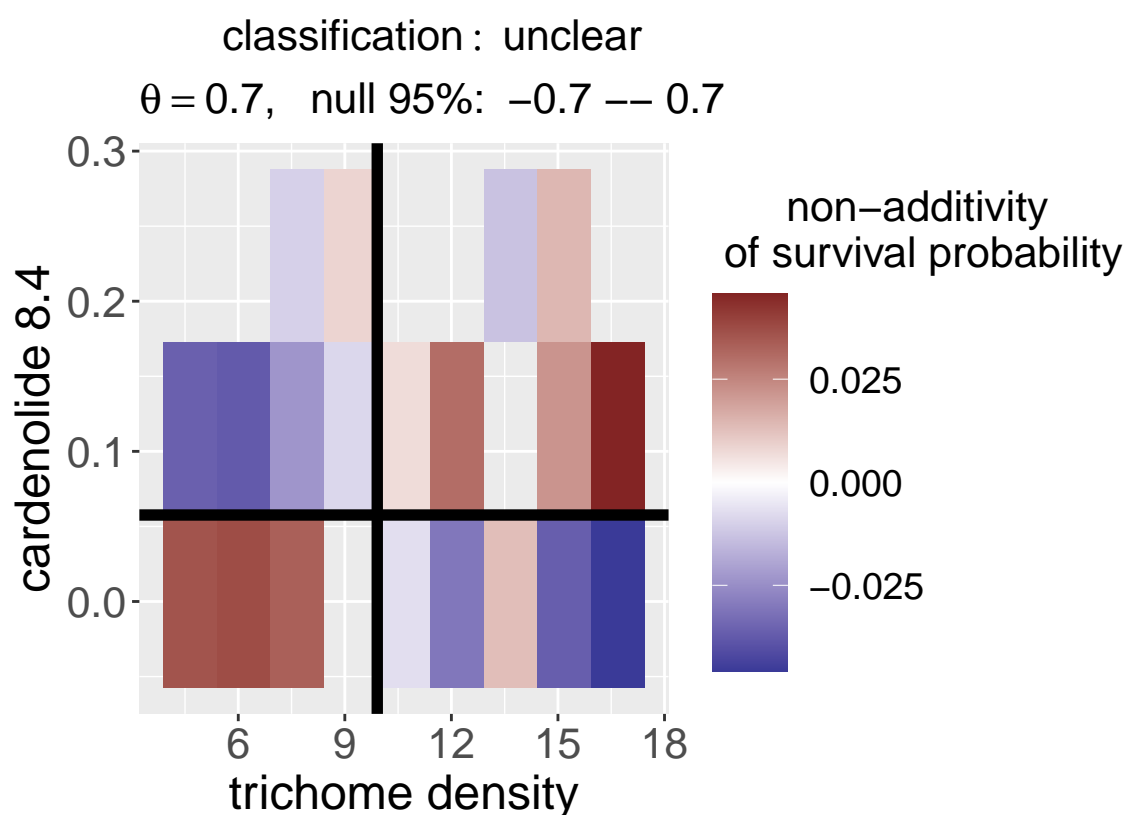

**(cm)****Beetle Survival****Random Forest predictions**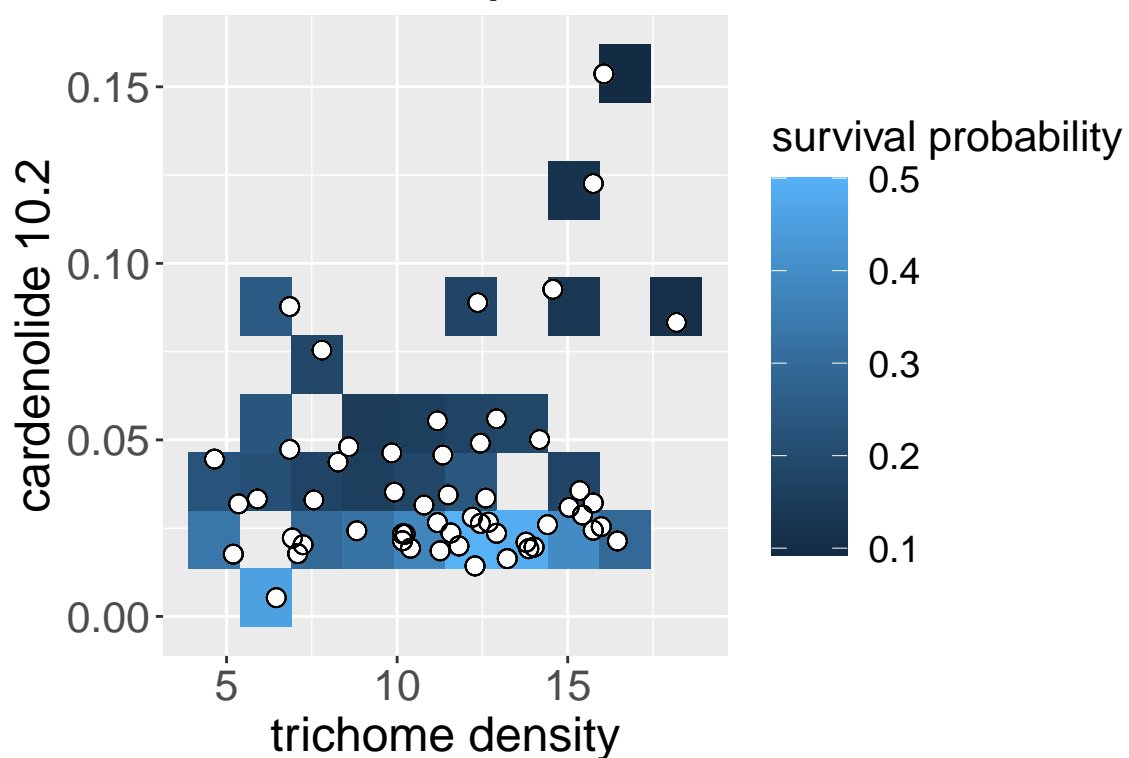

classification : synergy

 $\theta = -0.727$ , null 95%:  $-0.636$  --  $0.636$ 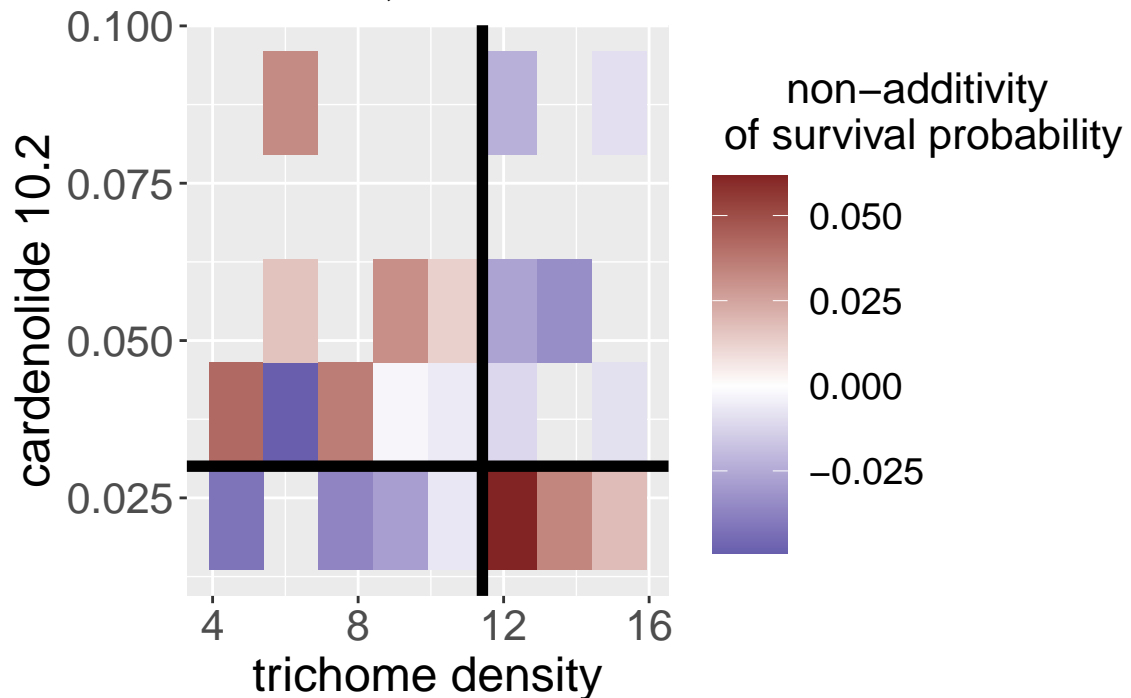**(cn)****Beetle Survival****Random Forest predictions**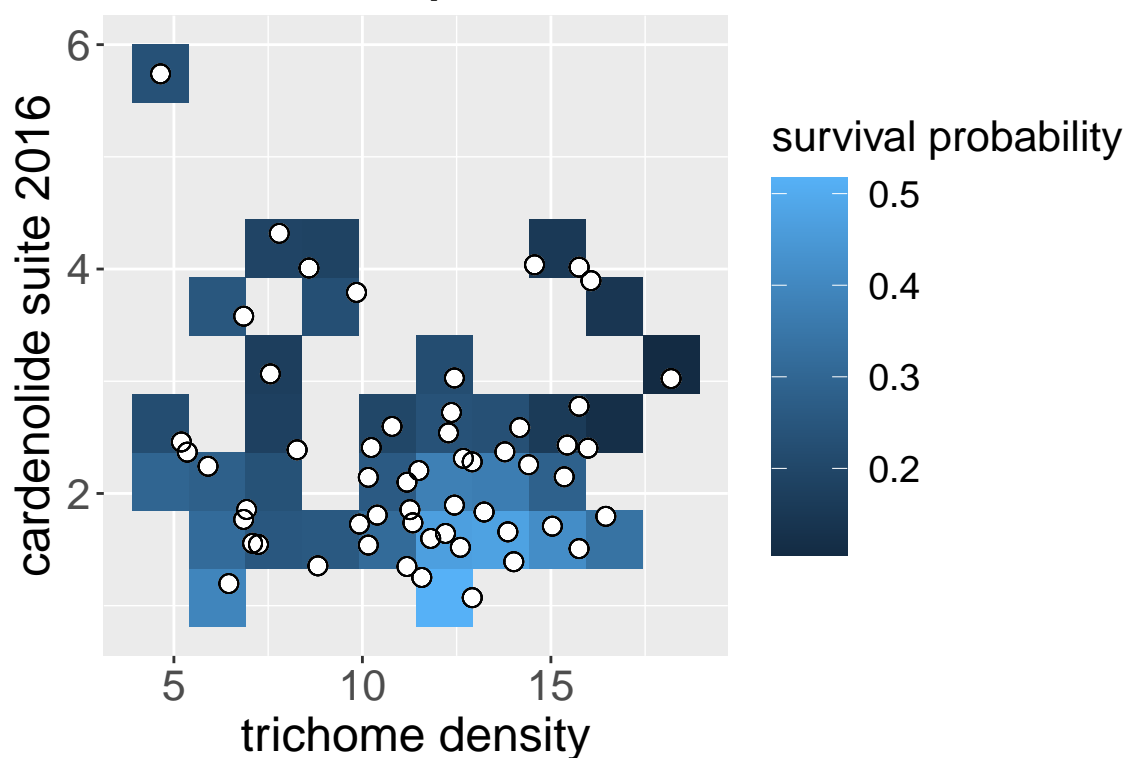

classification : synergy

 $\theta = -0.875$ , null 95%:  $-0.5$  --  $0.5$ 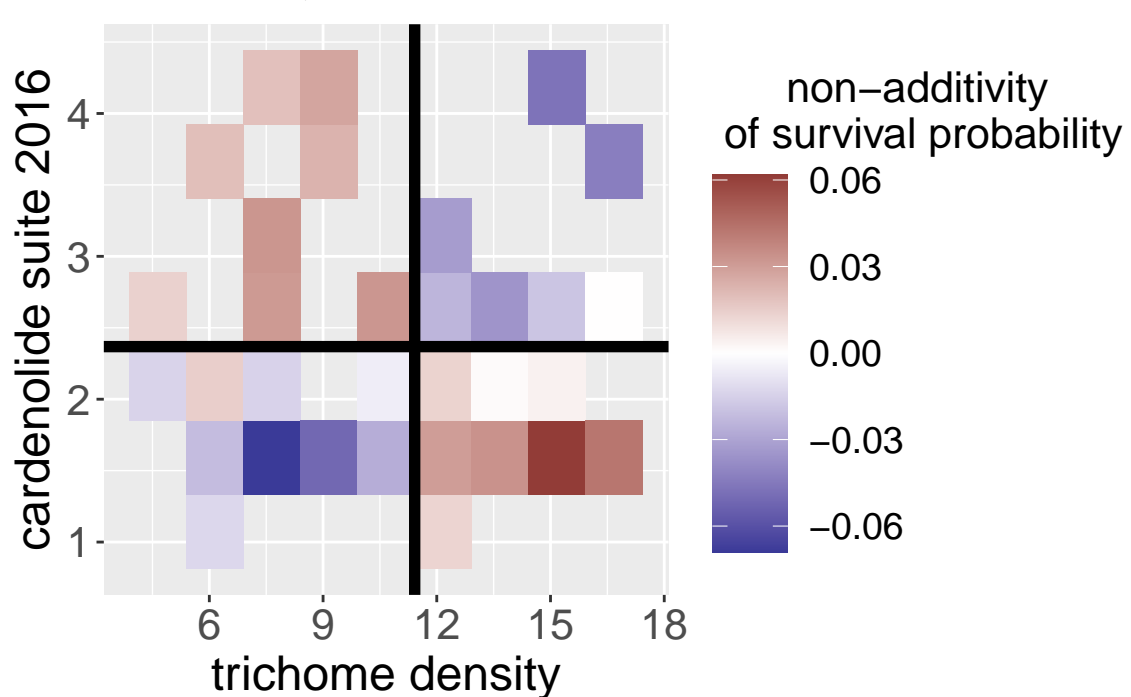**(co)****Beetle Survival****Random Forest predictions**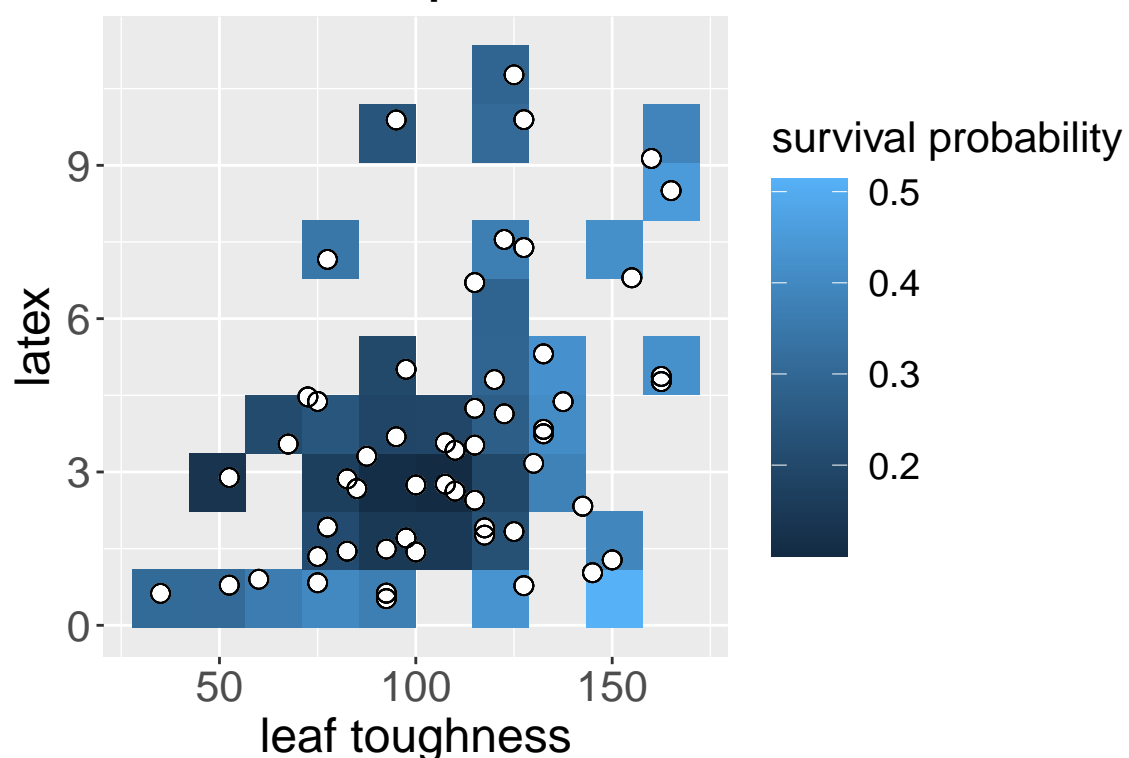

classification : unclear

 $\theta = -0.455$ , null 95%:  $-0.455$  --  $0.455$ 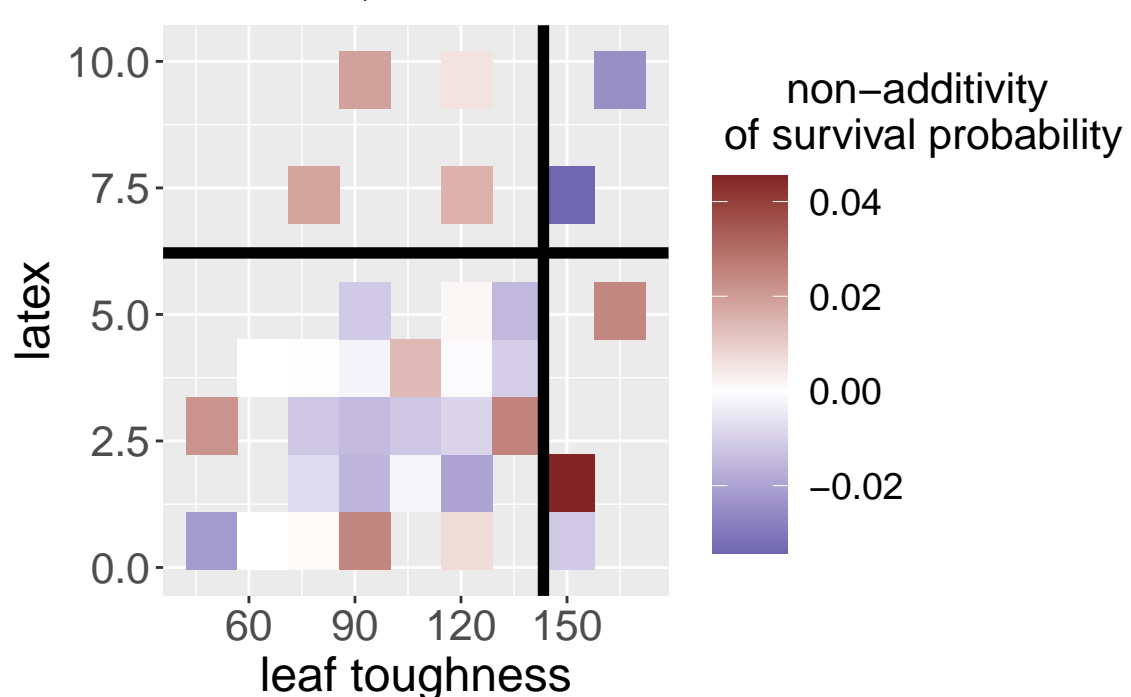

**(cp)****Random Forest predictions**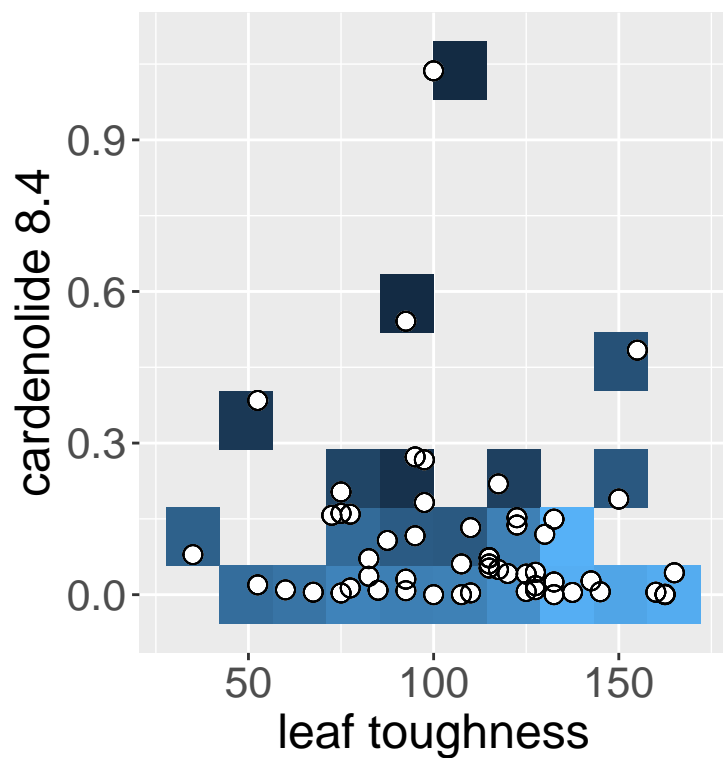**Beetle Survival**

classification : unclear

 $\theta = -0.467$ , null 95%:  $-0.733$  --  $0.733$ 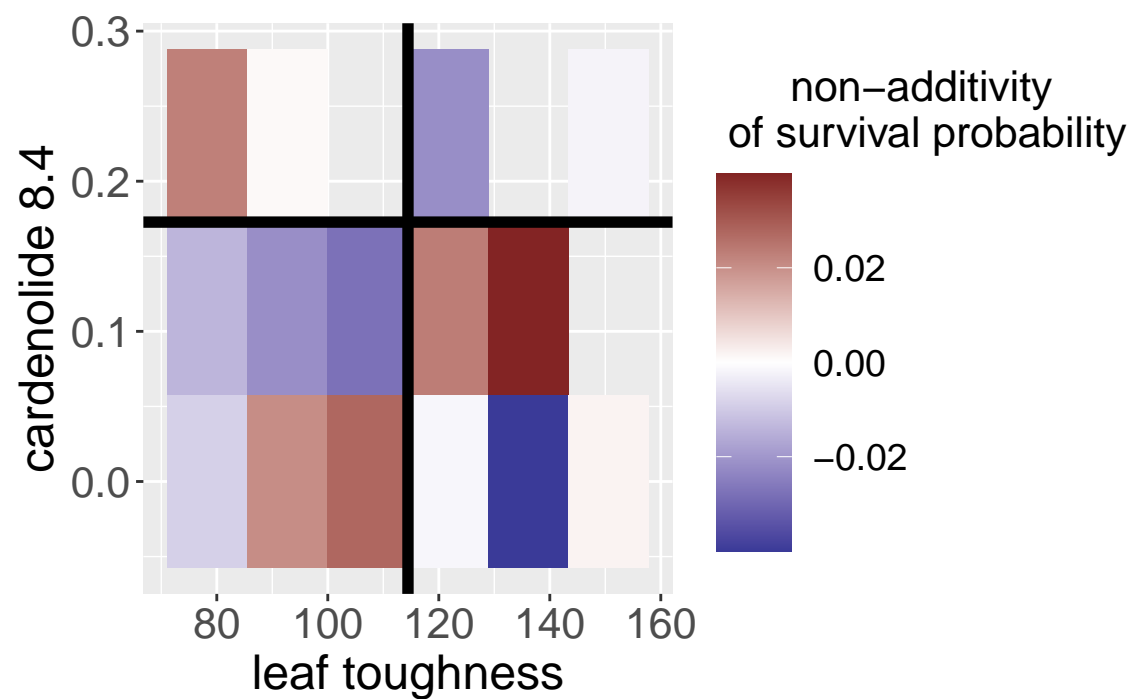**(cq)****Random Forest predictions**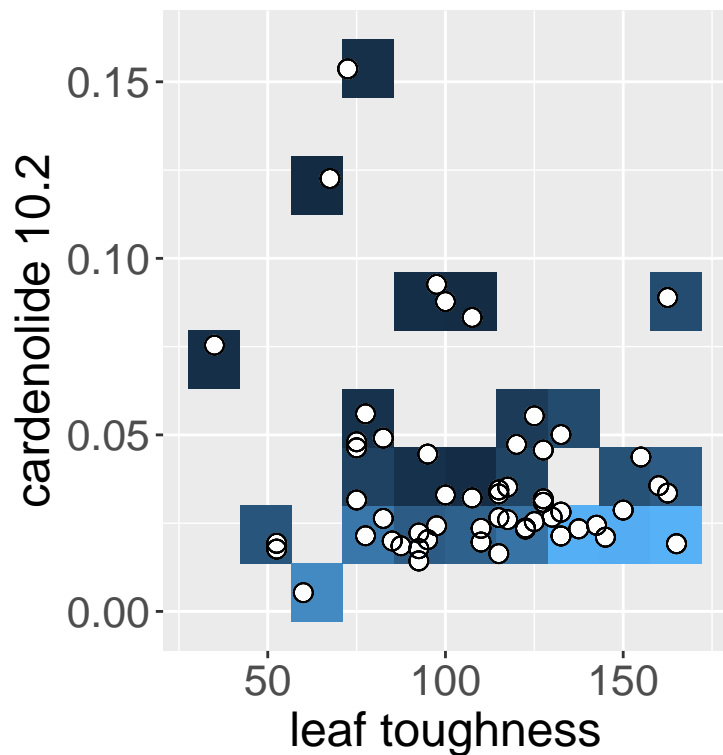**Beetle Survival**

classification : synergy

 $\theta = -1$ , null 95%:  $-0.684$  --  $0.684$ 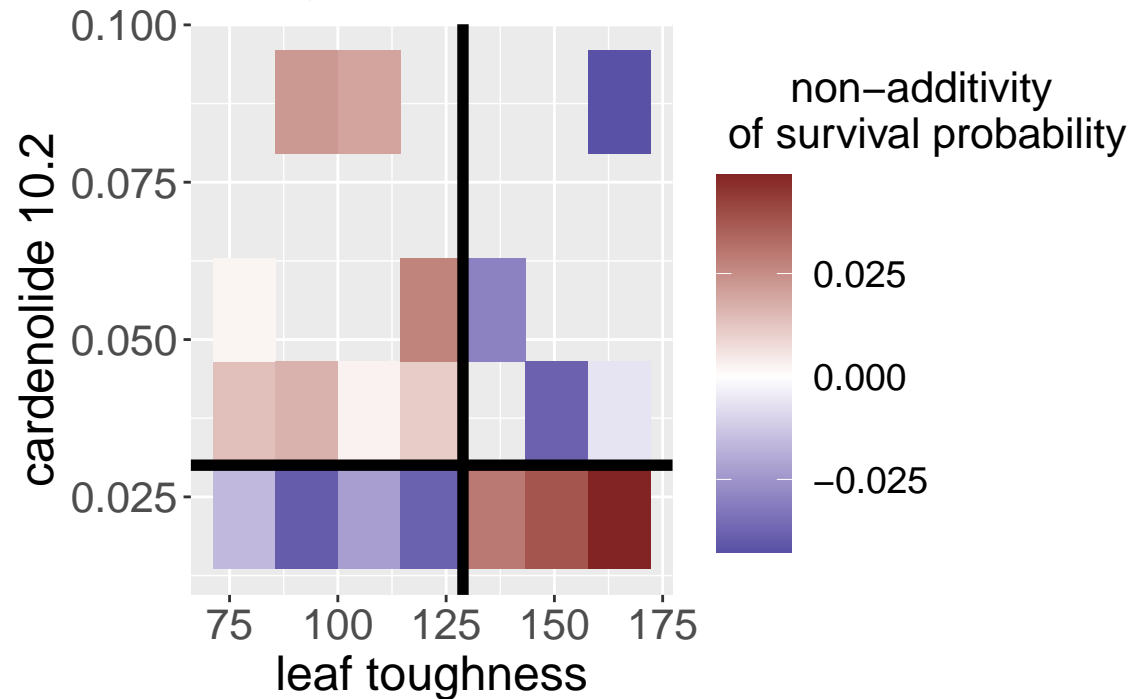**(cr)****Random Forest predictions**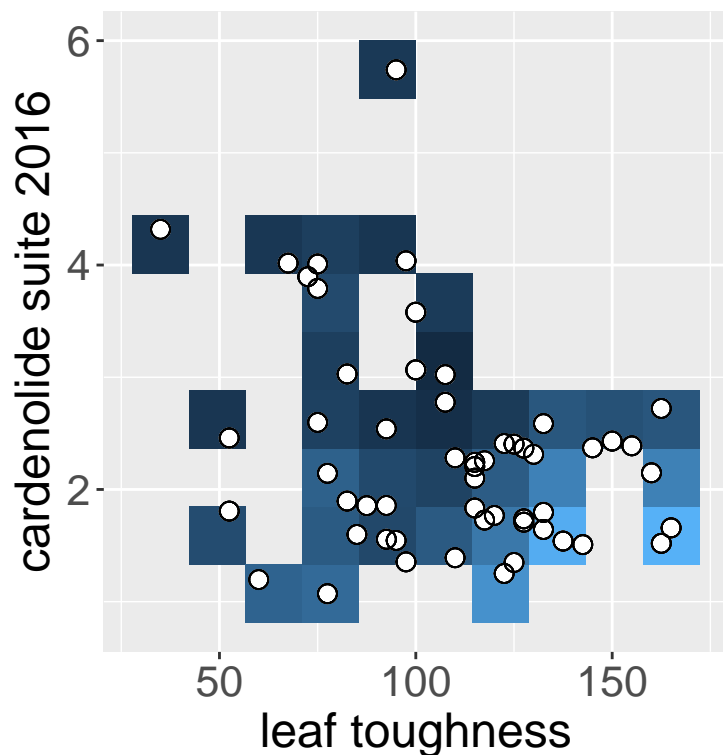**Beetle Survival**

classification : synergy

 $\theta = -0.867$ , null 95%:  $-0.533$  --  $0.533$ 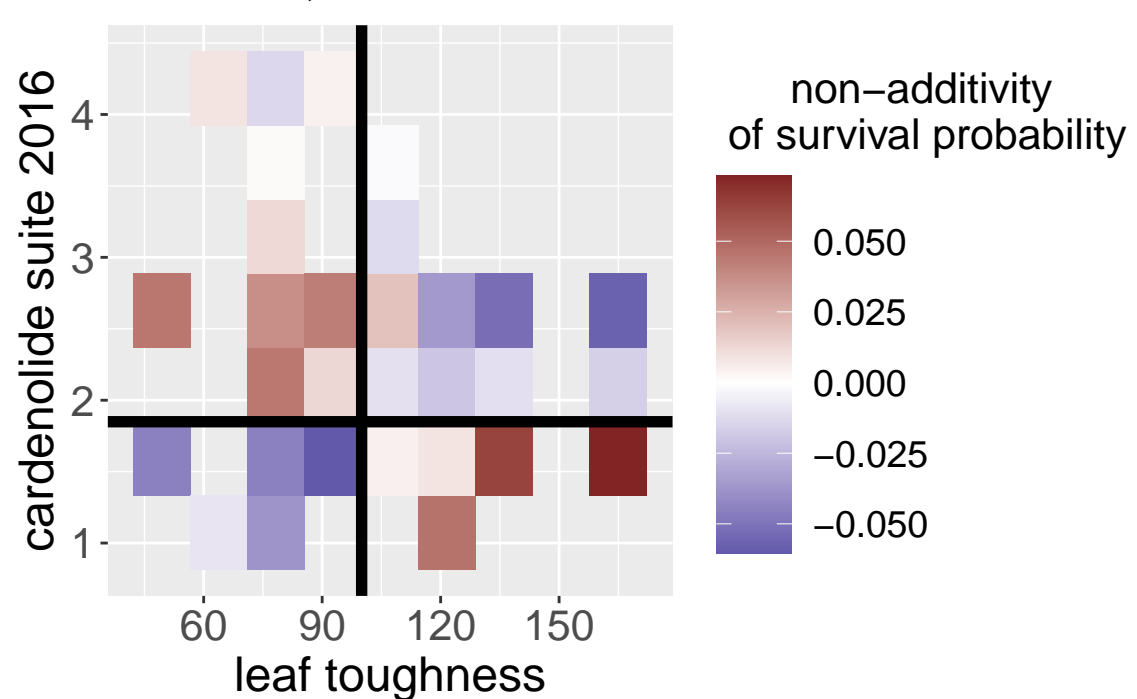



**(cs)****Beetle Survival****Random Forest predictions**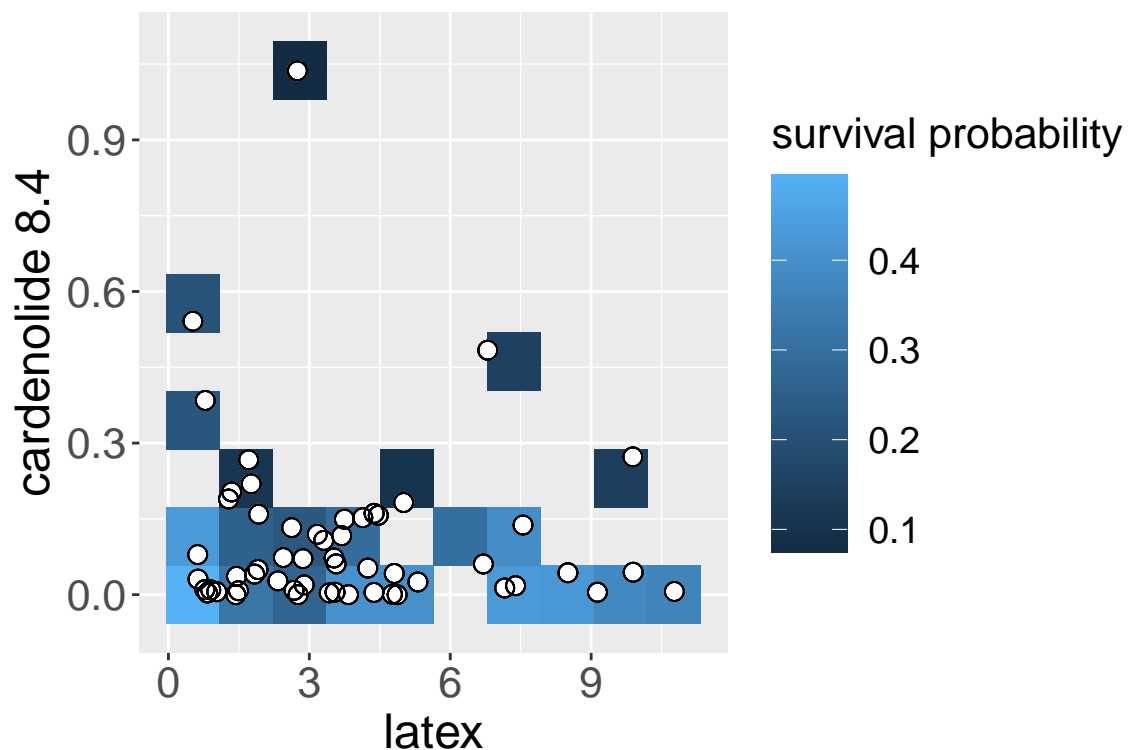

classification : unclear

 $\theta = -0.333$ , null 95%:  $-0.74$  --  $0.733$ 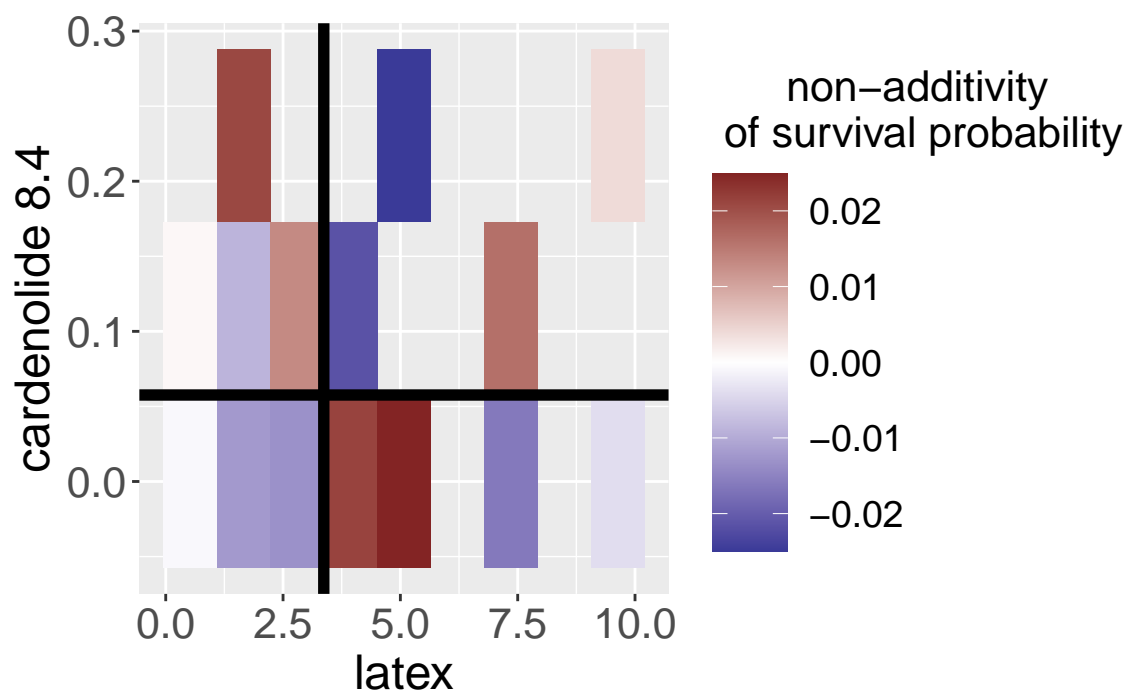**(ct)****Beetle Survival****Random Forest predictions**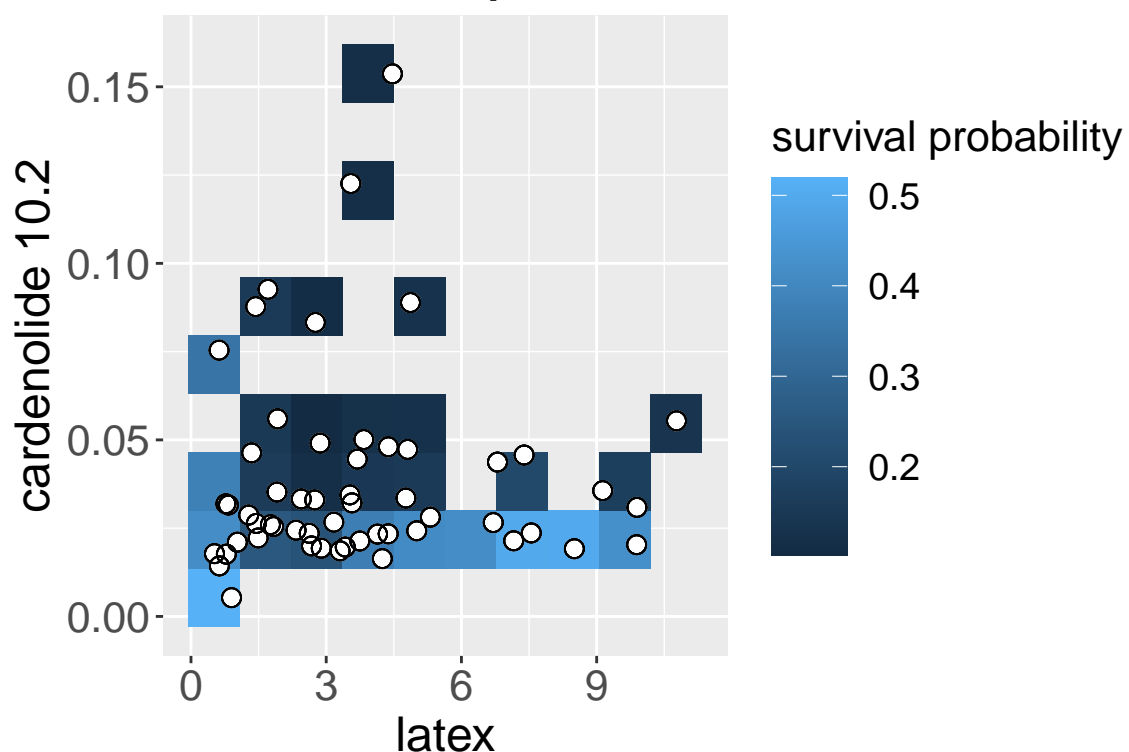

classification : synergy

 $\theta = -1$ , null 95%:  $-0.619$  --  $0.619$ 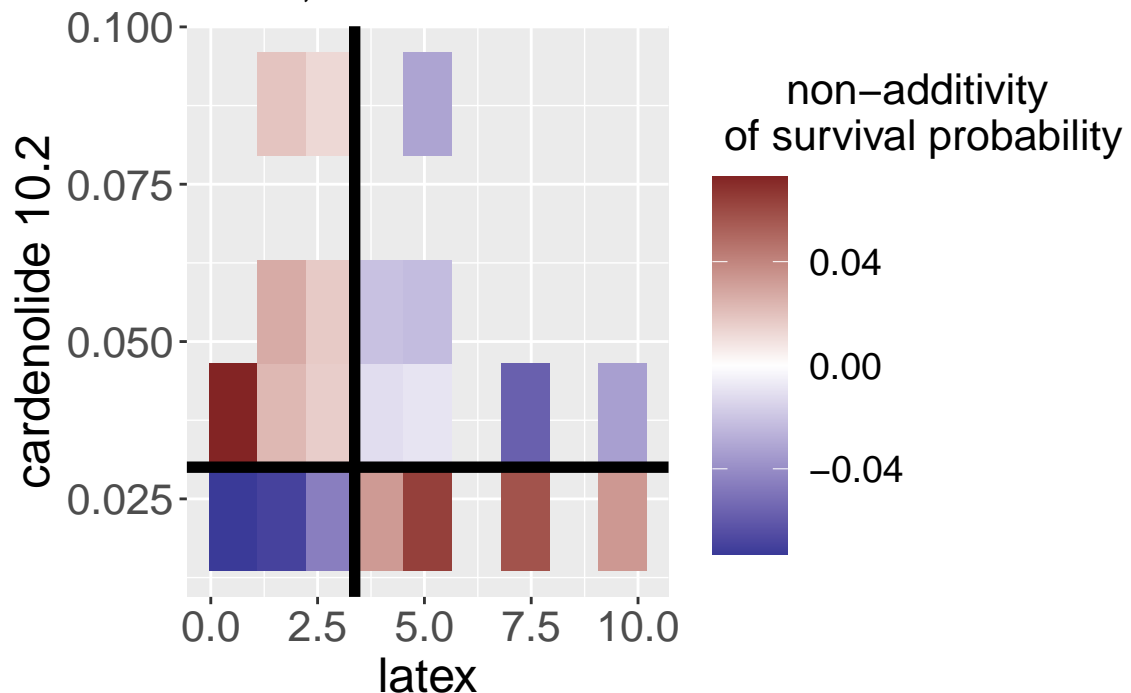**(cu)****Beetle Survival****Random Forest predictions**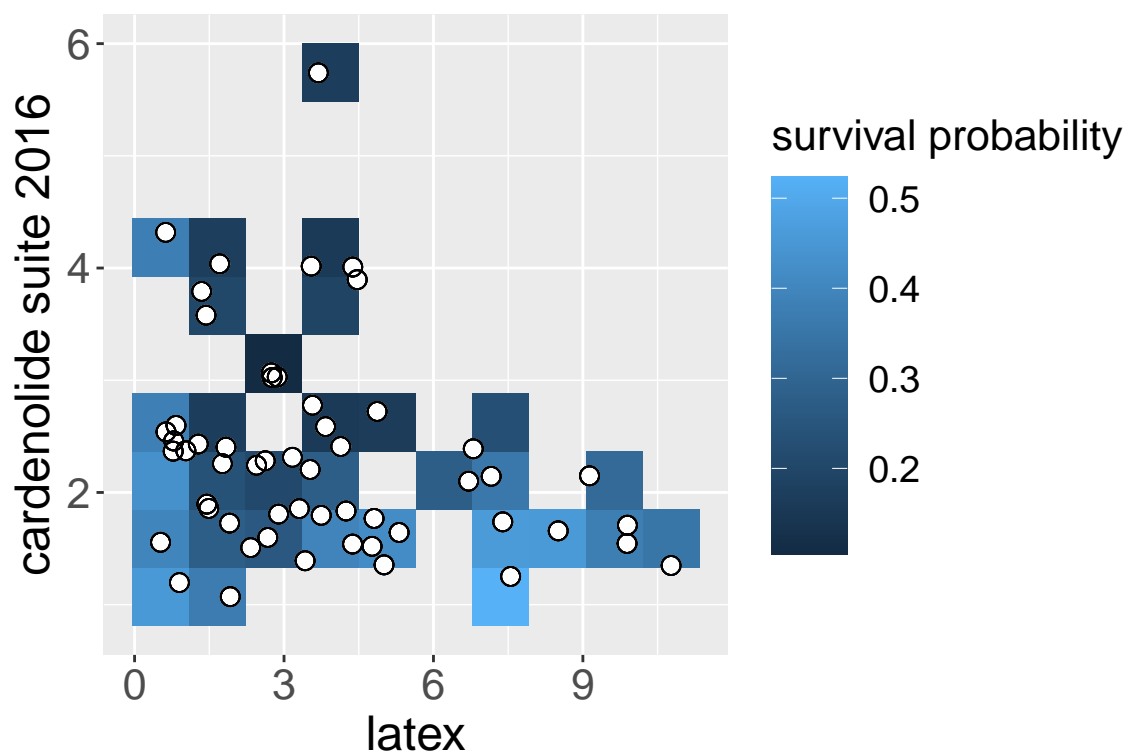

classification : synergy

 $\theta = -0.692$ , null 95%:  $-0.538$  --  $0.538$ 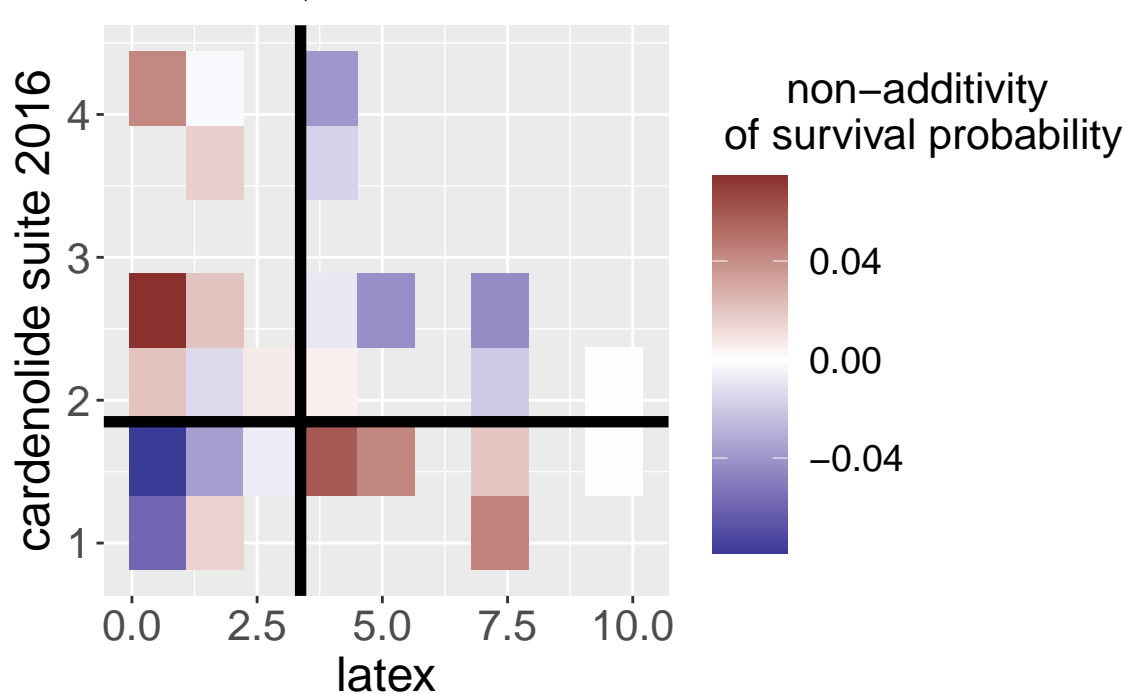

(cv)

### Beetle Survival

#### Random Forest predictions

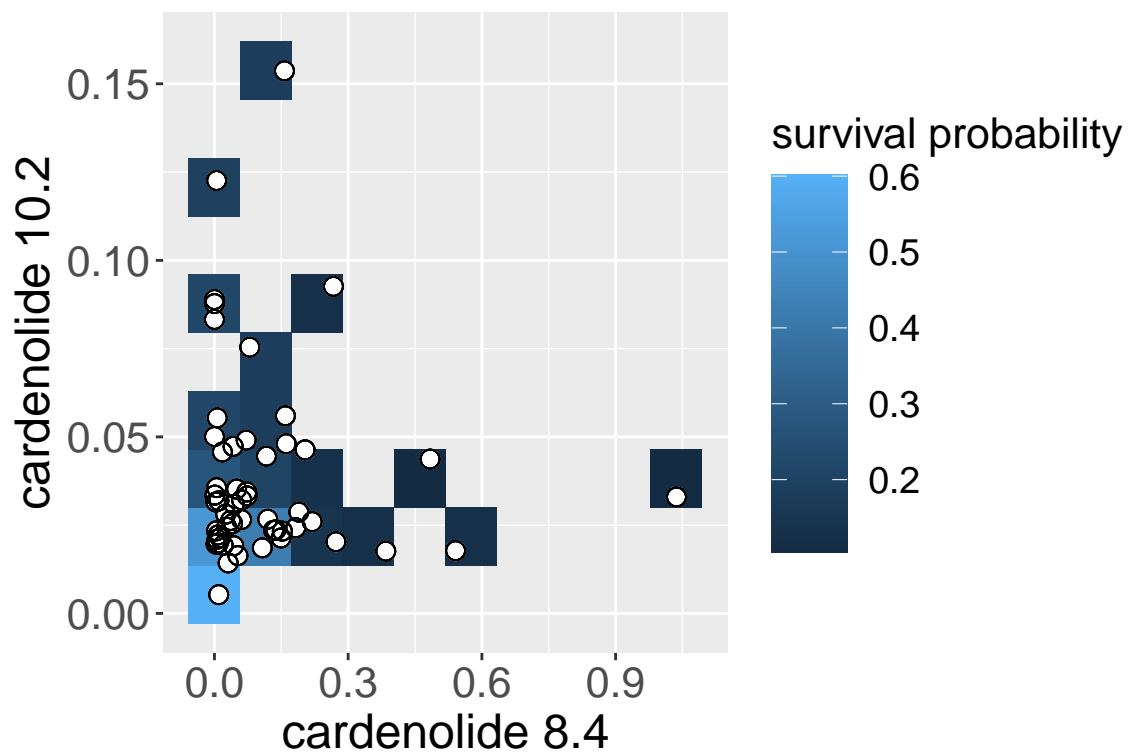

classification : unclear

$\theta = 0.8$ , null 95%: -0.8 -- 1

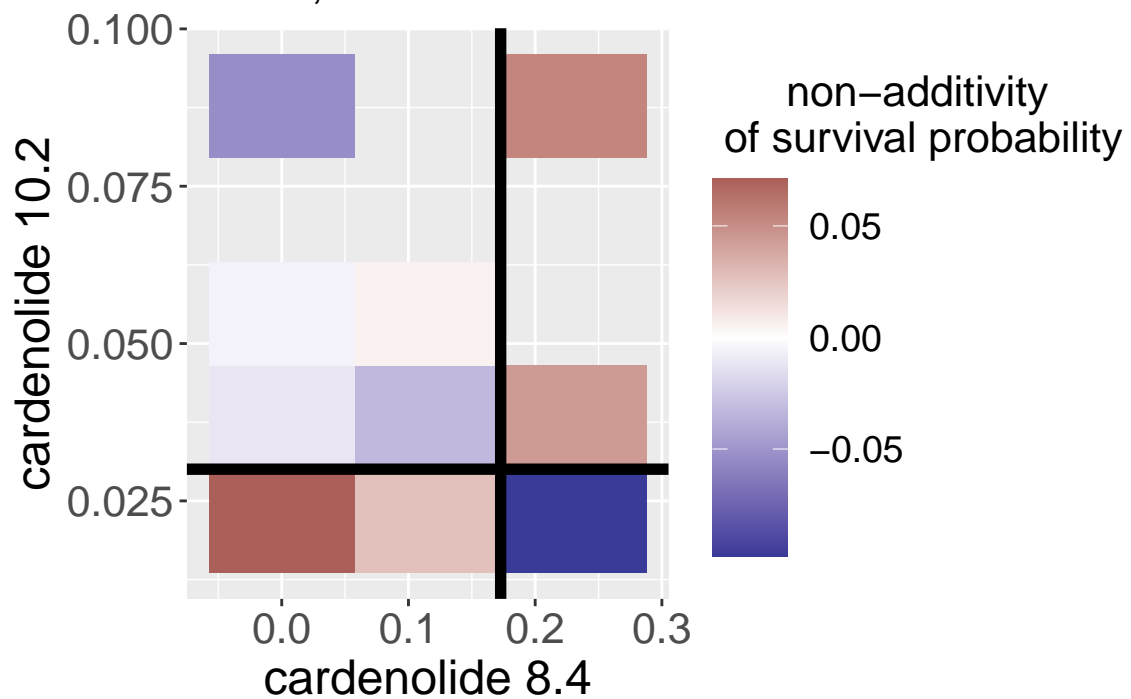

(cw)

### Beetle Survival

#### Random Forest predictions

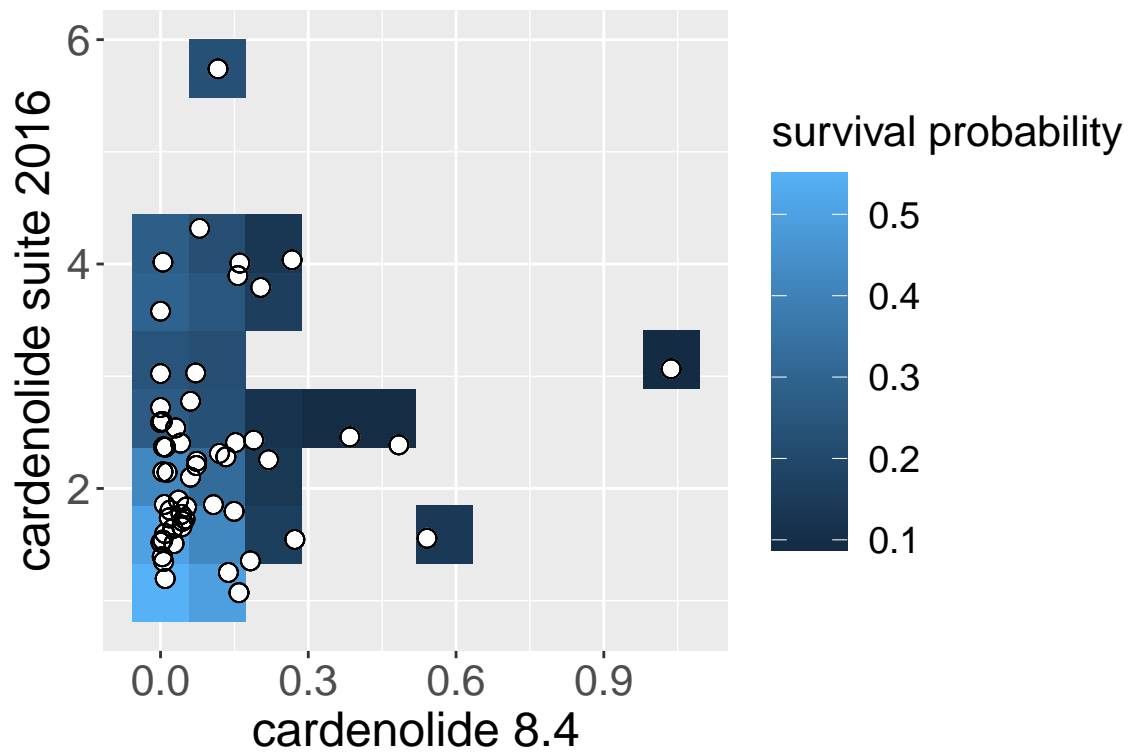

classification : unclear

$\theta = 0.684$ , null 95%: -0.684 -- 0.684

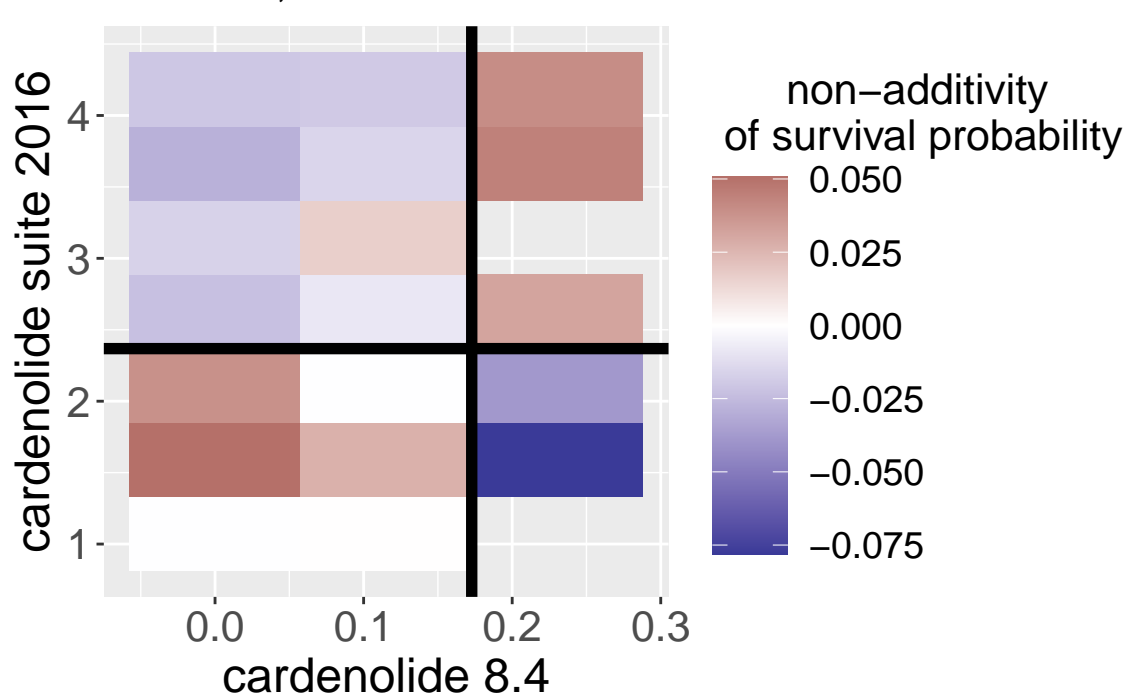

(cx)

### Beetle Survival

#### Random Forest predictions

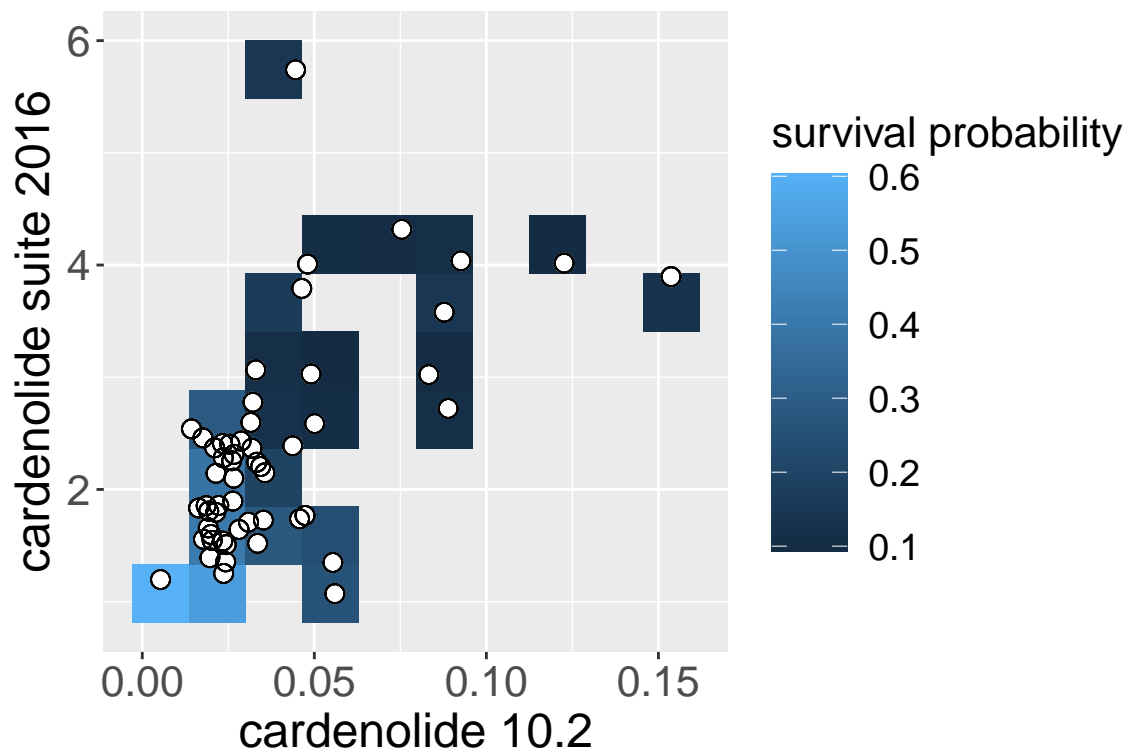

classification : unclear

$\theta = -0.333$ , null 95%: -0.667 -- 0.556

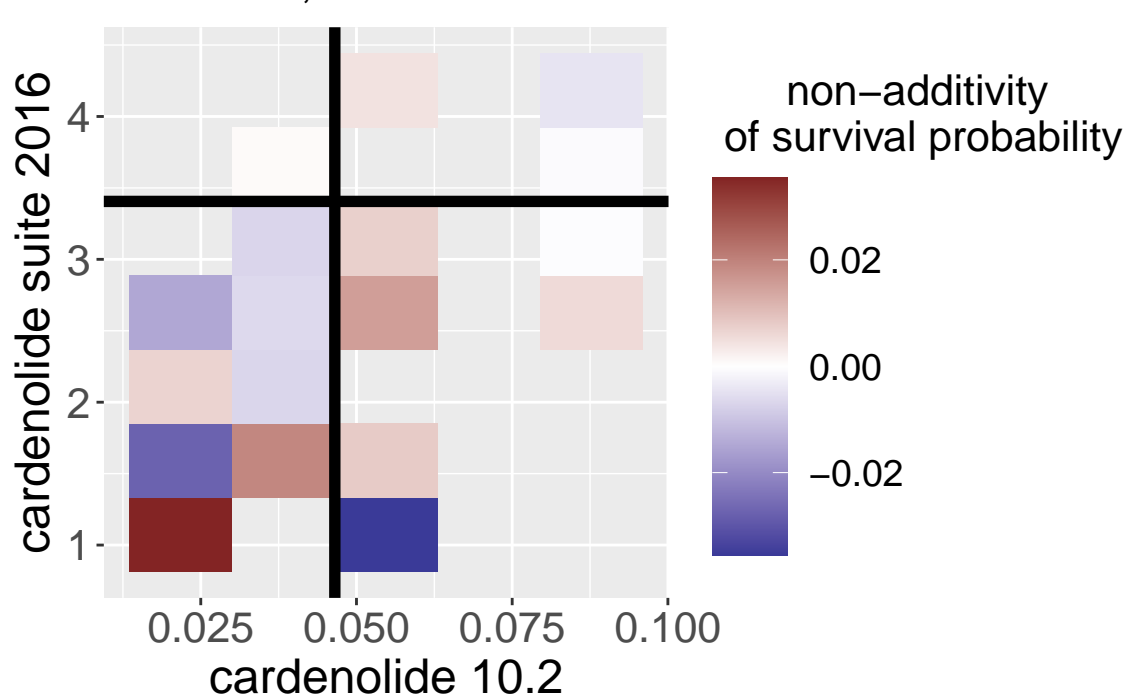

Supplement: Supplementary file [file media-4.pdf]
